# Supplementary material for: The Effect of Breed and Age on the Growth Performance, Carcass Traits and Metabolic Profile in Breast Muscle of Chinese Indigenous Chickens
Source: Foods. 2022 Feb 7;11(3):483. doi: 10.3390/foods11030483 (PMC8834177; doi:10.3390/foods11030483)
Supplement: Supplementary file 1 [file foods-11-00483-s001.zip › Supplementary tables.xlsx]

## Sheet: Table S1
Table S1. Detailed information of the annotated metabolites.
Alignment ID	Average Rt(min)	Quant mass	Metabolite name	Total score	HMDB	Super Class	Class	Sub Class	QC-2	QC-3	QC-4	QC-5	QC-6	CON-2	CON-3	CON-4	CON-6	CON-7	CON-8	MH60-3	MH60-4	MH60-5	MH60-6	MH60-7	MH60-8	MH75-1	MH75-2	MH75-3	MH75-4	MH75-7	MH75-8	TE60-1	TE60-2	TE60-3	TE60-4	TE60-6	TE60-7	TE75-2	TE75-3	TE75-4	TE75-5	TE75-6	TE75-8
4	5.214	174.1	Tranexamic acid	80.7	HMDB0014447	Organic acids and derivatives	Carboxylic acids and derivatives	Amino acids, peptides, and analogues	0.481714	0.487405	0.48835	0.494864	0.494747	0.536845	0.517536	0.512474	0.476289	2.50689e-05	0.482831	0.00056811	0.505238	0.522172	0.00104556	0.00475888	0.496303	0.00111216	0.519268	0.493378	0.51694	0.504139	0.519087	0.00156145	0.493301	0.491213	0.000851668	0.527087	0.486397	0.5184	0.00141464	0.521051	0.501679	0.50897	0.489026
8	5.295	174.1	Ethylamine	98.3	HMDB0013231	Organic nitrogen compounds	Organonitrogen compounds	Amines	0.481714	0.487079	0.48745	0.494295	0.494227	0.534858	0.516551	0.511159	0.474087	0.483595	0.479649	0.489851	0.504449	0.520538	0.505098	0.499574	0.494966	0.467152	0.518485	0.491904	0.516635	0.504218	0.518806	0.460629	0.492066	0.49018	0.490831	0.527087	0.484367	0.517797	0.490888	0.521061	0.500363	0.508692	0.488558
12	5.368	171.1	Methylamine	95.4	HMDB0000164	Organic nitrogen compounds	Organonitrogen compounds	Amines	0.690072	0.715691	0.718105	0.72156	0.718442	0.788632	0.847087	0.750315	0.723118	0.666853	0.782535	0.723588	0.691414	0.770901	0.669343	0.712277	0.758035	0.798828	0.757082	0.801036	0.760347	0.711596	0.770109	0.579791	0.715263	0.708498	0.691483	0.562945	0.668668	0.716737	0.593436	0.749553	0.651046	0.644605	0.742397
14	5.502	146.041	Hydroxylamine	80.3	HMDB0003338	Homogeneous non-metal compounds	Homogeneous other non-metal compounds		0.0017177	0.00166903	0.00132689	0.00151258	0.00153799	0.00126949	0.000368641	0.00172659	0.00166475	0.00169675	0.00157242	0.00139877	0.0014316	0.00133184	0.0020111	0.00162506	0.00171075	0.00148969	0.0011669	0.00144721	0.00123006	0.00122116	0.00133533	0.00140199	0.00168993	0.00115233	0.00154827	0.00124495	0.00165742	0.00128833	0.00181071	0.00120213	0.00145754	0.00153608	0.00146359
19	5.608	221.096	Boric acid	91.6					0.0445347	0.0462228	0.0468534	0.0461605	0.0461001	0.0514635	0.0494701	0.0482653	0.0536636	0.0338914	0.0482604	0.0554591	0.0485984	0.050383	0.048777	0.0456069	0.0451805	0.0530418	0.0329176	0.0373429	0.0430446	0.0405557	0.0479458	0.0492809	0.0427283	0.0441237	0.0532583	0.0595625	0.0439614	0.0444035	0.0529144	0.0490222	0.0419047	0.042118	0.0419173
21	5.667	147	Itaconic acid	78.3	HMDB0002092	Lipids and lipid-like molecules	Fatty Acyls	Fatty acids and conjugates	0.00416985	0.00428184	0.00419261	0.00452625	0.00448773	0.00406907	0.00478513	0.00403994	0.00713644	0.00403681	0.00388372	0.00419539	0.00329852	0.0036835	0.00416365	0.00438197	0.00435868	0.00433849	0.00435744	0.00445871	0.0041223	0.00352392	0.00413296	0.00379531	0.00406883	0.00419102	0.00488404	0.00271809	0.00348627	0.00363513	0.003699	0.00434774	0.00358226	0.00334619	0.00387732
22	5.725	160.049	Dimethylglycine	98.2	HMDB0000092	Organic acids and derivatives	Carboxylic acids and derivatives	Amino acids, peptides, and analogues	0.00557586	0.0057463	0.00595289	0.00587141	0.0058448	0.00687213	0.00556213	0.0065292	0.00420652	0.0040441	0.00486888	0.00649313	0.00509506	0.00569661	0.00677769	0.00646828	0.00812327	0.0059981	0.00530609	0.00684595	0.00557113	0.00557582	0.00589467	0.00580035	0.00649348	0.00581941	0.0104508	0.00392108	0.00558767	0.00481143	0.00271409	0.00475126	0.00428162	0.00472966	0.00404163
23	5.752	159.1	1-hexanol	92.9	HMDB0012971	Lipids and lipid-like molecules	Fatty Acyls	Fatty alcohols	0.00190691	0.00155109	0.0011382	0.00132382	0.00138312	0.00279166	0.00277115	0.00279355	0.00303432	0.00292491	0.00290114	0.00311276	0.00326327	0.00312831	0.002728	0.00302948	0.00369999	0.00411116	0.00373375	0.00393894	0.00374404	0.00337387	0.00413195	0.00241872	0.00309172	0.00309783	0.00300787	0.00237776	0.00311458	0.00320522	0.00270992	0.003652	0.00293552	0.00314161	0.00360899
24	5.781	164.969	Benzylalcohol	67.4	HMDB0003119	Benzenoids	Benzene and substituted derivatives	Benzyl alcohols	0.000371918	0.000402675	0.000410506	0.000402138	0.000399954	0.000384395	0.000320135	0.000292794	0.000241266	0.000370142	0.000325142	0.00035337	0.000368205	0.00034773	0.000306915	0.000345714	0.00039432	0.000471138	0.000446303	0.000413088	0.000423	0.000427452	0.000394781	0.00038212	0.000472701	0.000379738	0.000441075	0.000354253	0.000386559	0.000348495	0.000402213	0.000437008	0.000398805	0.000386456	0.000443614
35	6.128	156.1	Piperidone	81	HMDB0011749	Organoheterocyclic compounds	Piperidines	Piperidinones	0.000929364	0.000974365	0.000943131	0.00098656	0.000970278	0.000994508	0.00091472	0.000889502	0.00106623	0.00083366	0.0010435	0.00105992	0.000976466	0.00100476	0.000983671	0.0009058	0.000922546	0.000954905	0.000832909	0.00111749	0.000954197	0.00102529	0.000935183	0.00110131	0.00100385	0.000977752	0.00118888	0.000950411	0.00110109	0.000928786	0.00104194	0.000938211	0.00106865	0.00084101	0.00102539
38	6.24	147.024	Carbamic acid	81.8	HMDB0003551	Organic acids and derivatives	Organic carbonic acids and derivatives		0.293197	0.319053	0.33341	0.330724	0.327448	0.307746	0.317966	0.272315	0.303335	0.308201	0.301699	0.292077	0.298353	0.321185	0.269129	0.273231	0.333774	0.387498	0.371901	0.376068	0.365482	0.332118	0.368451	0.253059	0.305345	0.295545	0.306998	0.252013	0.307275	0.322399	0.282456	0.365165	0.310993	0.308149	0.348767
40	6.317	136.007	2-picolinic acid	79.6	HMDB0002243	Organoheterocyclic compounds	Pyridines and derivatives	Pyridinecarboxylic acids and derivatives	0.0370893	0.0430053	0.0452549	0.0434608	0.0428679	0.0325447	0.0285506	0.0257259	0.0322404	0.0303139	0.0326858	0.0309736	0.029388	0.0320799	0.0263712	0.0269224	0.0365177	0.042894	0.0395598	0.0426728	0.0372189	0.0358156	0.0352466	0.0297833	0.0319838	0.0309495	0.0351007	0.0249109	0.0346616	0.0322999	0.0316302	0.0341936	0.033058	0.0284851	0.0348615
43	6.416	170.076	Epsilon-caprolactam	80.9	HMDB0062769	Organoheterocyclic compounds	Lactams	Caprolactams	0.0012361	0.00151875	0.00136326	0.00140918	0.00136948	0.00136087	0.00141175	0.00169235	0.00137649	0.00138796	0.00161377	0.00168999	0.00154878	0.00178808	0.0014751	0.00137385	0.00154527	0.00140955	0.00143664	0.00160989	0.00145905	0.00176899	0.00140355	0.00126964	0.00123901	0.00129994	0.00150888	0.00154958	0.00145158	0.00158302	0.0015611	0.00129851	0.00136099	0.00138675	0.00124738
45	6.488	318.005	Kynurenic acid	71.2	HMDB0000715	Organoheterocyclic compounds	Quinolines and derivatives	Quinoline carboxylic acids	0.00714994	0.00767258	0.00783812	0.00789697	0.00784635	0.00706906	0.00762217	0.00664697	0.00660239	0.00651326	0.00644498	0.00642974	0.00722447	0.00721958	0.00687166	0.00711965	0.00728276	0.00724731	0.00738488	0.00725302	0.007878	0.0069011	0.00791436	0.00620371	0.00663526	0.00692876	0.0066494	0.00697034	0.00658732	0.00717526	0.00649679	0.00816199	0.0069129	0.00759636	0.00801581
48	6.619	174.007	Pyruvic acid	96.1	HMDB0000243	Organic acids and derivatives	Keto acids and derivatives	Alpha-keto acids and derivatives	0.0105778	0.0111736	0.0112874	0.0111875	0.0111663	0.00535454	0.0216753	0.00511172	0.0185937	0.0167475	0.0228388	0.00361562	0.00412765	0.00457928	0.00241162	0.00219635	0.00961542	0.00352843	0.0101756	0.0102927	0.0131798	0.00948545	0.0120915	0.00621099	0.0222733	0.00481568	0.00740198	0.00104725	0.0196137	0.0199382	0.00684427	0.0124623	0.00327776	0.002679	0.00500343
51	6.742	174.093	Diethylcarbamic acid	86					0.0241977	0.0253911	0.0257679	0.0256352	0.0255377	0.0258812	0.0235005	0.0242518	0.024968	0.0242875	0.0243739	0.0258691	0.0244657	0.0257868	0.0255814	0.024664	0.0251439	0.0246002	0.0238877	0.0250854	0.0244292	0.0248336	0.0237681	0.0255945	0.0260223	0.0253913	0.0261914	0.0250271	0.0246262	0.0245632	0.0253387	0.0247982	0.0260079	0.0242962	0.0242478
53	6.781	117.1	L-lactic acid	99.7	HMDB0000190	Organic acids and derivatives	Hydroxy acids and derivatives	Alpha hydroxy acids and derivatives	2.08214	2.12547	2.78515	2.51845	2.46511	2.78855	2.53448	2.05913	2.96265	2.11968	2.32531	2.9944	2.89526	2.21622	2.81569	2.84944	2.44985	3.04044	2.34319	2.42072	3.11592	2.84063	3.06183	2.67415	2.85975	2.78719	2.91786	2.42738	2.97448	2.84415	2.78868	3.03565	2.77051	2.83587	2.97847
58	6.957	272.033	D-xylose	77.3	HMDB0000098	Organic oxygen compounds	Organooxygen compounds	Carbohydrates and carbohydrate conjugates	0.000166663	0.000120404	0.000132858	0.000123438	0.000124858	0.000149444	0.000156102	0.000139034	0.000206696	0.000224064	0.000221806	0.000196513	0.000145589	0.0001305	0.000147026	0.000125783	0.000177803	0.000150652	0.000132968	0.000142543	0.000141426	0.000146686	0.000125224	0.000135257	0.000167587	0.000131926	0.000147702	0.000102651	0.000172075	0.000136419	0.000132378	0.000135647	0.000129039	0.000116274	0.000134949
61	7.039	177.062	Glycolic acid	97.1	HMDB0000115	Organic acids and derivatives	Hydroxy acids and derivatives	Alpha hydroxy acids and derivatives	0.00113393	0.00122771	0.00120717	0.00120755	0.00120506	0.00111934	0.00117024	0.00106238	0.00102328	0.0010333	0.00113882	0.0011979	0.0011647	0.00131585	0.000976574	0.00096386	0.00101864	0.00148274	0.00115623	0.0012615	0.00127104	0.00116248	0.00120477	0.000968673	0.00111644	0.00106594	0.00124932	0.000823315	0.00100767	0.000925761	0.000885252	0.00110497	0.00102557	0.000973328	0.00110249
62	7.097	169.1	Thymidine	71.6	HMDB0000273	Nucleosides, nucleotides, and analogues	Pyrimidine nucleosides	Pyrimidine 2'-deoxyribonucleosides	0.00154047	0.00151788	0.00143554	0.00152909	0.00151879	0.00140867	0.00154971	0.00147691	0.00212089	0.00245538	0.00167001	0.00178032	0.00133725	0.00147533	0.00143889	0.00143668	0.00144697	0.00281638	0.00188895	0.00185267	0.00161572	0.00156676	0.00125462	0.00157264	0.00151747	0.00125779	0.00134065	0.00143051	0.00169879	0.00126464	0.00153096	0.00126342	0.0014431	0.00137278	0.0017015
64	7.175	311.036	Shikimic acid	68.8	HMDB0003070	Organic oxygen compounds	Organooxygen compounds	Alcohols and polyols	0.00023842	0.00027407	0.000343537	0.000362315	0.000347612	0.000208749	0.000139687	0.000132941	0.000145256	0.000134044	0.000128491	0.000171055	0.000155391	0.00014681	0.000175028	0.000170067	0.000174515	0.00015934	0.000158785	0.00018487	0.000194203	0.000152687	0.000201007	0.000152746	0.000173314	0.000167527	0.000174389	0.000174664	0.000173539	0.000146905	0.000145644	0.000164602	0.000171737	0.000156738	0.000162571
66	7.224	217	2-oxo-propanoic acid	92.9					0.00101487	0.00101354	0.00104713	0.00103995	0.00103343	0.000758227	0.00212262	0.000695663	0.00155196	0.00117584	0.00146123	0.000884328	0.000732727	0.000673496	0.000670749	0.000727788	0.00131788	0.00079263	0.00141288	0.00126904	0.00161424	0.00123558	0.00125761	0.00088702	0.00149986	0.000738243	0.000972885	0.000544944	0.00152358	0.00115008	0.0012515	0.00117282	0.000686002	0.000770013	0.000927486
67	7.256	163.012	3-hydroxyphenylacetic acid	72.3	HMDB0000440	Benzenoids	Phenols	1-hydroxy-4-unsubstituted benzenoids	0.00113302	0.00106437	0.00097805	0.00101939	0.001018	0.00109729	0.00134698	0.00124167	0.0014898	0.00131826	0.00142139	0.00149306	0.00126788	0.00132455	0.00121692	0.00114227	0.00138931	0.00120789	0.00126329	0.00130767	0.0011643	0.00121497	0.00122684	0.001217	0.00121802	0.00117894	0.00134422	0.00100121	0.00130532	0.00106998	0.00116182	0.00109421	0.00103697	0.000951025	0.000993078
68	7.269	165.844	Pyrrole-2-carboxylic acid	70.1	HMDB0004230	Organoheterocyclic compounds	Pyrroles	Pyrrole carboxylic acids and derivatives	0.000331391	0.000256894	0.000312363	0.000300651	0.00030111	0.000340011	0.000380712	0.00027646	0.000329227	0.00031733	0.000406337	0.000340854	0.000334415	0.000334306	0.000240632	0.000339102	0.000353846	0.000318198	0.000292821	0.000326193	0.000357348	0.000300645	0.000310485	0.000269856	0.000306039	0.000324486	0.00024577	0.000278018	0.000313508	0.000267537	0.000246044	0.000226614	0.000285473	0.000344722	0.000304407
70	7.32	173.1	4-methylvaleric acid	82.1	HMDB0000689	Lipids and lipid-like molecules	Fatty Acyls	Fatty acids and conjugates	0.00253607	0.00283168	0.00285001	0.00287545	0.00283891	0.00275641	0.00287535	0.00251644	0.0026471	0.00253617	0.00251912	0.0025831	0.00261463	0.00284989	0.00248461	0.00262271	0.00297199	0.00345071	0.00315971	0.0032246	0.00341617	0.00295315	0.00342159	0.00243632	0.00276285	0.00284453	0.00278835	0.00228564	0.00298059	0.00306445	0.00279492	0.00335743	0.00298008	0.00289132	0.0032356
75	7.473	116.1	L-alanine	95.5	HMDB0000161	Organic acids and derivatives	Carboxylic acids and derivatives	Amino acids, peptides, and analogues	0.612875	0.621707	0.621232	0.620352	0.619749	0.641731	0.717494	0.627743	0.563983	0.511889	0.744191	0.640844	0.533055	0.694244	0.716793	0.688657	0.534591	0.473291	0.441101	0.733544	0.534789	0.745271	0.564425	0.53752	0.622447	0.513087	0.736348	0.36895	0.622879	0.616146	0.480112	0.444551	0.545075	0.466826	0.455608
78	7.542	202.095	1-butylamine	93.5	HMDB0031321	Organic nitrogen compounds	Organonitrogen compounds	Amines	0.000368994	0.000398409	0.000356811	0.000381153	0.000382546	0.000410492	0.000367383	0.000374187	0.000340911	0.000352351	0.000387397	0.000375663	0.00037406	0.00038143	0.000391856	0.000365608	0.000386281	0.000379755	0.000394138	0.000368501	0.000401036	0.000339359	0.000363142	0.000329234	0.00037519	0.000384418	0.000400828	0.000405573	0.000369741	0.00037265	0.000344722	0.000386599	0.000376367	0.000397976	0.000374355
83	7.78	168	4-aminophenol	72.4	HMDB0001169	Benzenoids	Benzene and substituted derivatives	Aniline and substituted anilines	0.00151523	0.00136694	0.00152221	0.00146124	0.00145025	0.000406054	0.00348228	0.000353654	0.00457752	0.00341827	0.00672798	0.000253853	0.000176364	0.000245312	0.000103699	7.7607e-05	0.0011515	0.000270241	0.000890918	0.00105467	0.0017033	0.00129901	0.0014672	0.00043384	0.00623023	0.000534475	0.000488222	8.71767e-05	0.00357577	0.00361154	0.000743133	0.00154199	0.000203597	9.29134e-05	0.000259038
85	7.833	116	Adrenaline	85.6	HMDB0000068	Benzenoids	Phenols	Benzenediols	0.000343115	0.000316823	0.000371013	0.0825483	0.0167935	0.000302602	0.000513233	0.000458531	0.00045226	0.000344924	0.000459385	0.000493233	0.000387006	0.00048932	0.000416384	0.000351394	0.000386428	0.000523419	0.000426465	0.000416643	0.000409416	0.000389719	0.000363439	0.000314042	0.00043683	0.000349143	0.000418648	0.000322299	0.000441779	0.000287271	0.000381466	0.000452127	0.000431874	0.000334752	0.000303819
87	7.871	131.05	2-hydroxybutyric acid	97	HMDB0000008	Organic acids and derivatives	Hydroxy acids and derivatives	Alpha hydroxy acids and derivatives	0.00121634	0.00811845	0.00801697	0.00683997	0.0065292	0.00999817	0.0106708	0.00909431	0.00845958	0.00904176	0.00854696	0.00958678	0.00829048	0.00838077	0.00540089	0.00817618	0.00852253	0.00837214	0.00820626	0.0100915	0.00726756	0.00611136	0.00656884	0.00832807	0.00834211	0.00869134	0.00932418	0.00600935	0.00853719	0.00809838	0.00826661	0.00694081	0.0068037	0.00830165	0.00683754
88	7.92	96	Phthalic acid	72.9	HMDB0002107	Benzenoids	Benzene and substituted derivatives	Benzoic acids and derivatives	0.00229913	0.00194292	0.00224913	0.00172112	0.00183209	0.00144313	0.00196509	0.00197013	0.00198869	0.00214355	0.00207195	0.00201037	0.00195548	0.0022185	0.00122784	0.00224112	0.00202539	0.000776537	0.00118617	0.00139346	0.00136939	0.000667693	0.00131038	0.00205531	0.00195729	0.00095666	0.0012121	0.00108979	0.00175412	0.000746799	0.00118818	0.000811	0.00119912	0.00137534	0.000572342
91	7.965	146.09	L-cystine	72.5	HMDB0000192	Organic acids and derivatives	Carboxylic acids and derivatives	Amino acids, peptides, and analogues	0.00129978	0.00256354	0.00166501	0.00245406	0.00225832	0.00125372	0.00375983	0.00368111	0.00127541	0.00165071	0.00143438	0.00114172	0.00199623	0.00126669	0.00318487	0.00310131	0.000871725	0.00392838	0.00232543	0.00482312	0.00374678	0.00308082	0.00436316	0.00073532	0.00358676	0.00325136	0.00365701	0.00268653	0.00090556	0.00330416	0.00303425	0.00392753	0.00297888	0.00321166	0.00341176
101	8.214	142.1	Butyrolactam	81.5	HMDB0002039	Organoheterocyclic compounds	Pyrrolidines	Pyrrolidones	0.0013202	0.00135592	0.00145263	0.00139975	0.00139967	0.00192792	0.00571611	0.00200057	0.00111288	0.00158468	0.00158605	0.00191231	0.00101266	0.00198463	0.00133311	0.00163177	0.00134631	0.000931085	0.00202889	0.00130941	0.0013828	0.00105403	0.0018473	0.00111534	0.00120864	0.00132513	0.00158033	0.000884071	0.00103293	0.000992763	0.000742163	0.00125184	0.000782607	0.00101029	0.00123097
105	8.355	100	2-((2-chloroethyl)ethylamino)ethanol	94					0.00145843	0.00143241	0.00156891	0.0015364	0.00151693	0.00143276	0.0014322	0.00141898	0.00137061	0.00137375	0.00173999	0.00163604	0.00154282	0.00147184	0.00155129	0.00153759	0.00158541	0.0016236	0.00142528	0.00139277	0.00143043	0.00148962	0.00141033	0.00142828	0.00189129	0.00165508	0.00161724	0.0018328	0.00159529	0.00162484	0.00143688	0.00174668	0.00135195	0.0016348	0.0016841
106	8.376	152.007	3-pyridinol	86.7					0.00292228	0.0030953	0.00291819	0.00300423	0.00301908	0.00296142	0.00329565	0.00298929	0.00319536	0.00293956	0.00288851	0.00331167	0.00296537	0.00300656	0.00288663	0.0028651	0.00332875	0.00336811	0.00334122	0.00331908	0.0032959	0.00300202	0.00322709	0.00273571	0.00307231	0.00306219	0.00311422	0.00293478	0.00301481	0.00308486	0.00289056	0.00317	0.00293564	0.00293709	0.00311164
107	8.401	86.1	Nonadecanoic acid	73	HMDB0000772	Lipids and lipid-like molecules	Fatty Acyls	Fatty acids and conjugates	0.00214062	0.0022335	0.00246478	0.00237356	0.00236288	0.00184918	0.00230333	0.00214618	0.00138135	0.00130002	0.000837997	0.00151029	0.00170348	0.00321483	0.0020751	0.00202604	0.00190916	0.00160964	0.00147066	0.00165578	0.00180653	0.00134371	0.00178028	0.00143559	0.0015197	0.00196226	0.00162973	0.00203278	0.00118843	0.00148757	0.00126264	0.00161914	0.00160657	0.0016248	0.00202458
108	8.429	147.02	(r)-3-hydroxybutyric acid	100	HMDB0000011	Organic acids and derivatives	Hydroxy acids and derivatives	Beta hydroxy acids and derivatives	0.103063	0.106914	0.108387	0.107728	0.107535	0.0345982	0.0679343	0.0341892	0.0579314	0.128334	0.0569322	0.107652	0.109387	0.1011	0.0790289	0.105122	0.173362	0.0790706	0.0809906	0.171374	0.0477141	0.0481879	0.112218	0.124269	0.134261	0.195207	0.156233	0.180828	0.10155	0.102899	0.149825	0.0939437	0.114118	0.0712573	0.0556205
109	8.473	179.012	2-hydroxypentanoic acid	83.7	HMDB0001863	Lipids and lipid-like molecules	Fatty Acyls	Fatty acids and conjugates	0.000720973	0.000711806	0.000700913	0.000717106	0.000717947	0.000760503	0.000718367	0.000717591	0.000726832	0.00074939	0.000809772	0.000785057	0.000737553	0.000798938	0.000733899	0.00084303	0.000748591	0.000876533	0.000758434	0.000849759	0.000823797	0.000743978	0.000805469	0.00068928	0.000670403	0.000768051	0.000853149	0.000612665	0.000742333	0.000731357	0.0007051	0.00077755	0.000791129	0.000734996	0.000830352
112	8.629	130.1	N-methylalanine	95.3	HMDB0094692	Organic acids and derivatives	Carboxylic acids and derivatives	Amino acids, peptides, and analogues	0.0230623	0.0237552	0.0229267	0.023406	0.0233278	0.0315527	0.0321504	0.0306219	0.0214782	0.0290726	0.0302288	0.0234129	0.020632	0.0213547	0.0130105	0.0194872	0.025858	0.0150512	0.0200942	0.0229173	0.0270886	0.0202078	0.0135464	0.0224812	0.0303849	0.0170479	0.0226484	0.0208399	0.0228811	0.0261366	0.0168265	0.0208188	0.0242443	0.0181693	0.0122711
115	8.708	241	Methanephosphonothioic acid	83.4					0.0459812	0.048646	0.0494292	0.0489995	0.0488714	0.056845	0.0731647	0.0534381	0.0566578	0.048287	0.0613991	0.0580907	0.0513344	0.05517	0.043239	0.0371417	0.0502425	0.0525568	0.0416968	0.0338634	0.0506494	0.0522246	0.0475326	0.0359846	0.0793231	0.0419657	0.047638	0.0308579	0.0403372	0.0582747	0.0384542	0.0405333	0.0435786	0.0350284	0.0609215
117	8.739	221.096	Erythrose	68.1	HMDB0002649	Organic oxygen compounds	Organooxygen compounds	Carbohydrates and carbohydrate conjugates	0.00702064	0.0076402	0.00753844	0.0074873	0.00746885	0.00739448	0.00705641	0.00671843	0.00776624	0.00714053	0.0075013	0.00788966	0.00743722	0.00774486	0.00709673	0.00731484	0.00813675	0.00821129	0.00827724	0.00843469	0.00819969	0.00785378	0.00788365	0.00737668	0.00767426	0.00751418	0.00797352	0.00705676	0.00776914	0.00748552	0.00776649	0.0081359	0.00786076	0.00759613	0.00811818
119	8.842	151.021	Phenol	83.8	HMDB0000228	Benzenoids	Phenols	1-hydroxy-4-unsubstituted benzenoids	0.000755802	0.000780172	0.000728885	0.00078285	0.000789074	0.000907102	0.0010075	0.000908222	0.000881794	0.000745545	0.000836214	0.000945423	0.000791444	0.000847522	0.00080978	0.00077846	0.000773714	0.000702233	0.000773338	0.000817444	0.000848205	0.000818438	0.000744177	0.000701323	0.00075415	0.000719114	0.000865562	0.000796176	0.000779951	0.000760406	0.000742783	0.000762257	0.00071516	0.000719324	0.000756082
120	8.859	89	2-ketobutyric acid	88.6	HMDB0000005	Organic acids and derivatives	Keto acids and derivatives	Short-chain keto acids and derivatives	0.000175345	0.000185885	0.000222685	0.000234818	0.000238595	0.000257999	0.000181448	0.000233704	0.000285899	0.000215674	9.40872e-05	0.000252949	0.000376258	0.000404105	0.000217388	0.000358344	8.77822e-05	0.000292171	5.1988e-05	0.000281239	0.000137382	0.00027917	0.000109091	7.20242e-05	0.000111159	0.000314016	0.00014049	0.000329754	0.000361074	0.000107007	8.14482e-05	0.000273674	0.000161513	0.000153461	0.000157424
126	8.958	210.027	3-dehydroshikimic acid	63.9					0.000293259	0.000306625	0.000297911	0.000305295	0.000306655	0.000316934	0.000319671	0.000276001	0.000289286	0.000296019	0.000295413	0.000304639	0.000302466	0.000291047	0.000288085	0.000269389	0.00032657	0.000339344	0.000341943	0.00033873	0.000326144	0.000307078	0.000313046	0.000266198	0.000292937	0.000286427	0.000302891	0.000260093	0.000296853	0.000311658	0.000255336	0.000330616	0.00025097	0.000281619	0.000317509
127	8.983	102.057	Beta-alanine	97.7	HMDB0000056	Organic acids and derivatives	Carboxylic acids and derivatives	Amino acids, peptides, and analogues	0.00627836	0.00378259	0.00248703	0.00312239	0.00338462	0.00923407	0.0101997	0.0178759	0.0155137	0.00307339	0.00582324	0.00710138	0.00385669	0.00255919	0.00402104	0.00172842	0.00209618	0.00319569	0.00171852	0.00112035	0.00100395	0.00212979	0.000991896	0.00251585	0.00281091	0.00266743	0.00452889	0.00204657	0.00257894	0.00123345	0.00117522	0.000878531	0.000883431	0.00090958	0.00111109
131	9.126	226.04	N-{2-hydroxyethyl}tetradecan-1-amine	70.4					0.00221429	0.00183307	0.00159077	0.00167836	0.00172898	0.00216251	0.00353411	0.00290432	0.00310898	0.00262031	0.00284038	0.00300618	0.0027328	0.00286557	0.00237842	0.00234985	0.00293003	0.00237803	0.00232783	0.00232836	0.00213871	0.00208162	0.00215698	0.00193538	0.00231168	0.00218343	0.00233276	0.00196858	0.00218551	0.00178222	0.00167258	0.00187235	0.00150997	0.0016585	0.00187055
134	9.364	131.1	3-hydroxyisovaleric acid	93.8	HMDB0000754	Lipids and lipid-like molecules	Fatty Acyls	Fatty acids and conjugates	0.00160062	0.00174821	0.00163363	0.00165606	0.00167016	0.00200776	0.00167782	0.00247893	0.00142506	0.00129621	0.00150411	0.00193743	0.00150392	0.00283184	0.00195084	0.00235435	0.0021484	0.0018727	0.00142892	0.00139264	0.00170507	0.00176047	0.00161343	0.00175412	0.00146617	0.00167786	0.00183795	0.00163548	0.000253948	0.00136107	0.00109522	0.00124447	0.000272416	0.0012881	0.00142487
135	9.369	144.1	L-valine	97.5	HMDB0000883	Organic acids and derivatives	Carboxylic acids and derivatives	Amino acids, peptides, and analogues	0.131182	0.137086	0.137036	0.136992	0.136632	0.173592	0.126319	0.16605	0.115415	0.106021	0.109914	0.171802	0.119656	0.219056	0.165348	0.160724	0.156419	0.153897	0.121429	0.127241	0.131313	0.141439	0.102935	0.127749	0.130545	0.144837	0.14756	0.143786	0.110404	0.117782	0.0839898	0.108841	0.103885	0.106533	0.10805
137	9.414	202.098	5-aminovaleric acid	78.6	HMDB0003355	Organic acids and derivatives	Carboxylic acids and derivatives	Amino acids, peptides, and analogues	0.00134185	0.00140237	0.00144803	0.00145801	0.001445	0.00141826	0.00135954	0.00128304	0.0013178	0.00131908	0.00129123	0.00140009	0.0013319	0.00129785	0.0014079	0.00135461	0.00138922	0.00139357	0.00133839	0.00136245	0.00139299	0.001318	0.00134728	0.0013539	0.00135829	0.00138408	0.0013633	0.00131311	0.00134752	0.00136889	0.00129602	0.00140804	0.00140858	0.00132472	0.00136443
139	9.477	117	Capric acid	78.5	HMDB0000511	Lipids and lipid-like molecules	Fatty Acyls	Fatty acids and conjugates	0.00217009	0.00249885	0.00263349	0.00247866	0.00246167	0.003272	0.00187437	0.00205976	0.00125335	0.000286957	0.00169456	0.00215171	0.0017863	0.00237631	0.00340247	0.00250194	0.00230605	0.00473168	0.00204134	0.00279481	0.0018264	0.00174852	0.00352263	0.00224617	0.00200336	0.00196986	0.00210097	0.0011087	0.0016572	0.0029453	0.00265905	0.00200688	0.00184188	0.00174744	0.0018012
143	9.66	116.1	L-alanine-alanine	85.3					0.0128384	0.0137349	0.013907	0.0135342	0.0135444	0.0133232	0.0122466	0.0121974	0.0128008	0.0128091	0.0124678	0.0127944	0.0131059	0.0135089	0.0131133	0.0132926	0.0132207	0.0129014	0.012025	0.0128157	0.0122791	0.0128551	0.0123488	0.0123547	0.0132258	0.0130319	0.0125692	0.01286	0.0123808	0.0130642	0.0125312	0.0131968	0.0128748	0.0118108	0.0115976
144	9.734	143	Phytol	79.6	HMDB0002019	Lipids and lipid-like molecules	Prenol lipids	Diterpenoids	0.00195834	0.00189144	0.00177995	0.00187932	0.00187707	0.00192178	0.00191662	0.00194189	0.0025443	0.00185761	0.00243627	0.00267561	0.00266949	0.00378977	0.00130488	0.00122641	0.00176529	0.00111883	0.00179554	0.00185099	0.00140142	0.00236874	0.00286503	0.0021413	0.00374029	0.00178413	0.0022511	0.000907002	0.00254524	0.0011804	0.00116846	0.00215007	0.000970707	0.00118638	0.00192162
145	9.742	147.024	4-hydroxybutanoic acid	97.3	HMDB0000549	Organoheterocyclic compounds	Lactones	Gamma butyrolactones	0.0262009	0.02764	0.0298856	0.0281421	0.0278371	0.0265687	0.0289464	0.026299	0.0340761	0.0253354	0.0371331	0.0337589	0.0367901	0.0511436	0.0164383	0.0184002	0.0276893	0.0146998	0.0277353	0.0266809	0.0173741	0.0350312	0.0442407	0.0289587	0.0569529	0.0268005	0.0284508	0.0133462	0.0337298	0.01518	0.0176535	0.0336518	0.013291	0.0174767	0.0308927
149	9.991	192.059	3-(4-hydroxyphenyl)propionic acid	81.8	HMDB0002199	Phenylpropanoids and polyketides	Phenylpropanoic acids		0.00250195	0.00264533	0.00272501	0.00267777	0.00268076	0.00255935	0.00223192	0.00225016	0.00230105	0.00223448	0.00240556	0.00236893	0.0022956	0.00252121	0.00229555	0.00251105	0.00277615	0.00259586	0.0027101	0.00284406	0.00271431	0.00280008	0.00286468	0.00242751	0.0023691	0.00239868	0.00270183	0.00244174	0.00263495	0.00263647	0.00244823	0.00295027	0.00267218	0.00271284	0.00274256
150	10.028	102.059	Dodecanoic acid, isopropanol ester	77.1					0.00408021	0.00371838	0.00339324	0.00342063	0.00346842	0.00359664	0.00356402	0.00366713	0.00415599	0.00390484	0.00383354	0.00421948	0.00386885	0.00374539	0.00372565	0.00359924	0.00369809	0.00304088	0.00286974	0.00315339	0.00288811	0.00301017	0.00284631	0.0034395	0.00347658	0.00344245	0.00362981	0.00312115	0.00338244	0.0029505	0.00284708	0.00290831	0.00273827	0.00246127	0.00248017
151	10.05	220.019	Sinapinic acid	70.1	HMDB0032616	Phenylpropanoids and polyketides	Cinnamic acids and derivatives	Hydroxycinnamic acids and derivatives	0.000387486	0.000443124	0.000420058	0.000424458	0.000423561	0.00040365	0.000379548	0.000402288	0.00036511	0.000375506	0.000370832	0.000389849	0.000367891	0.000413626	0.000399303	0.000382444	0.000430546	0.000404884	0.000374402	0.000405903	0.000396475	0.000375275	0.000374838	0.000400066	0.000366819	0.00040423	0.000414478	0.000350188	0.000357612	0.000405224	0.000447365	0.000398376	0.00039766	0.000354047	0.000354864
153	10.214	189.067	Urea	93.5	HMDB0000294	Organic acids and derivatives	Organic carbonic acids and derivatives	Ureas	0.00783	0.00802658	0.00809993	0.00797999	0.00798398	0.00877207	0.0151023	0.00883636	0.00702235	0.00735278	0.00910876	0.00527925	0.00883909	0.00462869	0.0052737	0.00558322	0.00495375	0.0067204	0.00547302	0.00611184	0.0087669	0.00673763	0.00916662	0.00512799	0.0098454	0.00525493	0.013935	0.00923374	0.00607268	0.00799756	0.0039229	0.00699788	0.00331789	0.00561632	0.00683519
154	10.233	174.1	Ethanolamine	98.1	HMDB0000149	Organic nitrogen compounds	Organonitrogen compounds	Amines	0.0192173	0.0208471	0.0223076	0.0216831	0.0215247	0.0164225	0.0182258	0.0149763	0.0141188	0.0153907	0.0178644	0.0185939	0.0184386	0.0141419	0.0206178	0.0184208	0.0165969	0.016031	0.0163345	0.0193238	0.0161638	0.019136	0.0148114	0.0163459	0.020818	0.0189472	0.0190554	0.0149783	0.0176369	0.0166702	0.0121998	0.0172331	0.0133054	0.0168214	0.018508
155	10.246	201.1	Octanoate radical	91.1					0.00419622	0.00455642	0.00461591	0.00458576	0.00455313	0.00430489	0.00399517	0.004087	0.00402672	0.00406931	0.00417513	0.00412418	0.00422289	0.00418996	0.00429362	0.00433174	0.00423406	0.00430841	0.00437935	0.0043313	0.00434611	0.00434487	0.00454011	0.00424062	0.00432793	0.00438601	0.00436197	0.00436984	0.00433873	0.00449011	0.00448716	0.00439341	0.00439956	0.00442146	0.00445872
157	10.321	299.1	Ciliatine	93.9	HMDB0011747	Organic acids and derivatives	Organic phosphonic acids and derivatives	Organic phosphonic acids	2.26877	2.35227	2.37388	2.35759	2.34883	2.51236	2.47735	2.34338	2.48404	2.33859	2.41845	2.51384	2.42138	2.56939	2.38578	2.37804	2.54013	2.62146	2.29102	2.54571	2.53613	2.43236	2.57122	2.26505	2.41192	2.4256	2.53349	2.09245	2.48854	2.34696	2.28629	2.45102	2.45158	2.26864	2.41015
161	10.358	147.1	Glycerol	91.7	HMDB0000131	Organic oxygen compounds	Organooxygen compounds	Carbohydrates and carbohydrate conjugates	0.196633	0.195732	0.19422	0.173832	0.169777	0.196837	0.0958998	0.0878512	0.104212	0.0984265	0.204706	0.206503	0.20156	0.105209	0.196939	0.189627	0.104065	0.0878411	0.200952	0.213593	0.195473	0.098683	0.208657	0.097963	0.111098	0.0989486	0.21595	0.100925	0.112312	0.103747	0.183928	0.196048	0.182252	0.18042	0.19302
169	10.569	180.948	Metharbital	68	HMDB0014606	Organoheterocyclic compounds	Diazines	Pyrimidines and pyrimidine derivatives	0.000379865	0.00030756	0.000332908	0.000318918	0.000328921	0.000341383	0.000458899	0.000433165	0.000433354	0.000360187	0.000370236	0.000288289	0.000459787	0.000400664	0.00039898	0.000336123	0.000366794	0.000339778	0.000313006	0.000240521	0.000244645	0.000405387	0.000271821	0.000332197	0.000381041	0.000374225	0.000359465	0.00033514	0.000339745	0.000286772	0.000242256	0.00027724	0.000232071	0.000224323	0.000278355
172	10.676	146.106	Leucine	84.5	HMDB0000687	Organic acids and derivatives	Carboxylic acids and derivatives	Amino acids, peptides, and analogues	0.00238556	0.00219007	0.00211365	0.00213114	0.00221609	0.00317875	0.00261338	0.00290396	0.00212125	0.0020228	0.0022055	0.00292618	0.00219912	0.0028856	0.00250894	0.00248989	0.00244899	0.00221019	0.00216131	0.00206947	0.00170973	0.00156684	0.00176216	0.00219701	0.00160555	0.00192829	0.00232389	0.0017269	0.00187501	0.00157086	0.00140908	0.00199378	0.00156659	0.00139344	0.00137449
173	10.684	158.1	L-isoleucine	96.7	HMDB0000172	Organic acids and derivatives	Carboxylic acids and derivatives	Amino acids, peptides, and analogues	0.0898344	0.0931556	0.0947327	0.0942646	0.0936114	0.115908	0.0968158	0.109814	0.0827378	0.0021767	0.075257	0.114631	0.0843635	0.153889	0.116032	0.111487	0.104172	0.104164	0.0827083	0.09646	0.0759055	0.10424	0.0717397	0.0925577	0.0846902	0.104618	0.101201	0.0984027	0.0823671	0.0834208	0.0633828	0.0744557	0.0756393	0.0806998	0.0795925
175	10.778	142.1	L-proline	96	HMDB0000162	Organic acids and derivatives	Carboxylic acids and derivatives	Amino acids, peptides, and analogues	0.120609	0.123625	0.123926	0.123079	0.122769	0.188273	0.131893	0.179484	0.116821	0.106808	0.157525	0.129051	0.0933804	0.144043	0.130496	0.137506	0.12315	0.0908378	0.090506	0.112585	0.115638	0.11523	0.0793978	0.0938624	0.12522	0.107774	0.134671	0.0781926	0.105652	0.103266	0.0754304	0.0758052	0.0762028	0.0746769	0.0783756
179	10.905	174.1	Glycine	99.4	HMDB0000123	Organic acids and derivatives	Carboxylic acids and derivatives	Amino acids, peptides, and analogues	0.25808	0.280348	0.289346	0.284832	0.282383	0.414103	0.261937	0.372346	0.211829	0.209995	0.239213	0.263519	0.181309	0.313537	0.295581	0.271166	0.256413	0.305281	0.216111	0.254923	0.238267	0.286966	0.217737	0.217345	0.2863	0.188829	0.356009	0.199471	0.209288	0.243078	0.174492	0.190368	0.177505	0.192068	0.178979
181	10.949	294.116	7-methylguanine	71.6	HMDB0000897	Organoheterocyclic compounds	Imidazopyrimidines	Purines and purine derivatives	0.000223145	0.000292498	0.00036469	0.000336393	0.00032759	0.000594814	0.000488385	0.000422556	0.000486449	0.00047023	0.000507784	0.000524667	0.000475308	0.0005104	0.00046253	0.000399119	0.000423689	0.000771759	0.000798466	0.000807734	0.00074357	0.000686526	0.000663652	0.000431361	0.00039794	0.000352169	0.000344061	0.000729213	0.000809462	0.000657478	0.000649568	0.000523247	0.000535558	0.000442573	0.000439491
183	11.044	240.084	1,3-dihydroxypyridine	82.9					0.00183076	0.00187641	0.00186089	0.00190671	0.00189732	0.00180791	0.00227677	0.00192205	0.00220165	0.00206968	0.00209469	0.00210138	0.00194082	0.00199972	0.00184837	0.00187497	0.00215098	0.00209967	0.00211263	0.00214165	0.00210942	0.00184733	0.00205675	0.0016748	0.00194325	0.00185115	0.00197604	0.00174247	0.00199585	0.00191669	0.00173761	0.00202131	0.00168459	0.00177352	0.00194183
184	11.074	147.039	Butanedioic acid	94.9	HMDB0000254	Organic acids and derivatives	Carboxylic acids and derivatives	Dicarboxylic acids and derivatives	0.0235611	0.0246958	0.0255708	0.0249338	0.0247822	0.00586169	0.0940972	0.00567267	0.0699065	0.0107921	0.0350434	0.00339079	0.00750489	0.00717993	0.00343326	0.0160952	0.00602405	0.00616177	0.0892839	0.0547057	0.0303205	0.00557136	0.0671706	0.0150127	0.0382506	0.00480523	0.048261	0.00872422	0.0671031	0.0144602	0.00770816	0.0134088	0.00375162	0.0122842	0.00605228
185	11.104	410.107	Pinitol	71.1	HMDB0034219	Organic oxygen compounds	Organooxygen compounds	Alcohols and polyols	0.000120166	0.000110782	0.000129848	0.000116114	0.000117693	9.70859e-05	9.94912e-05	9.3023e-05	9.88831e-05	9.59279e-05	9.62383e-05	0.000111998	0.000103236	9.31163e-05	9.92618e-05	0.000105822	9.32817e-05	9.41637e-05	0.000102536	0.000106081	9.3958e-05	0.00011987	9.88402e-05	0.000109408	0.000125166	0.000113001	0.000127365	0.000100048	0.000100066	0.000100852	0.000118324	0.000109026	0.000114031	9.7321e-05	9.52446e-05
189	11.247	466.083	Nicotinic acid	68.4	HMDB0001488	Organoheterocyclic compounds	Pyridines and derivatives	Pyridinecarboxylic acids and derivatives	0.000620781	0.000674309	0.00068584	0.000696962	0.000692371	0.000648167	0.00071453	0.000619174	0.000639889	0.000607394	0.000618771	0.000658604	0.000634871	0.000663654	0.000666651	0.000639027	0.000704259	0.000663873	0.000695812	0.000707313	0.000738851	0.000694028	0.000735136	0.000650539	0.00065617	0.000704456	0.000701995	0.000611925	0.000700385	0.000714247	0.000672334	0.000733495	0.000612312	0.000688677	0.000702608
191	11.288	147.014	Glyceric acid	96.7	HMDB0000139	Organic oxygen compounds	Organooxygen compounds	Carbohydrates and carbohydrate conjugates	0.0620405	0.0636762	0.0681819	0.0655093	0.0655544	0.0452097	0.121447	0.0435964	0.10232	0.0811667	0.0866902	0.0633071	0.0610083	0.0398901	0.0407565	0.0458801	0.0886769	0.0359452	0.0827508	0.0753954	0.0830324	0.0675686	0.102579	0.0568842	0.0902233	0.0403301	0.0471172	0.0312142	0.102143	0.0831749	0.0490235	0.0654156	0.0318691	0.0348987	0.0495807
194	11.34	215.1	2-imidazolidinone	82.5					0.00110147	0.00120215	0.00127516	0.0012794	0.00126343	0.00123696	0.00125027	0.00108638	0.0010464	0.000986644	0.00123027	0.00117982	0.00111869	0.00104916	0.0010899	0.00112471	0.00112438	0.00108194	0.00102412	0.00106744	0.0010063	0.00113369	0.00100148	0.000884839	0.00104974	0.00109011	0.00104948	0.00101246	0.00106168	0.00105008	0.000850206	0.00109966	0.00102999	0.000991229	0.00118843
199	11.439	241.066	Uracil	99.4	HMDB0000300	Organoheterocyclic compounds	Diazines	Pyrimidines and pyrimidine derivatives	0.00663769	0.00721916	0.00740997	0.00736991	0.00732136	0.00891687	0.00639303	0.00800271	0.00449383	0.00443195	0.00661926	0.00673583	0.00637211	0.00708799	0.00881214	0.00465724	0.00551017	0.00585716	0.00488333	0.00573977	0.00345899	0.00437623	0.00304515	0.00804483	0.00891641	0.00802111	0.00833556	0.0069732	0.00562992	0.00571031	0.00469534	0.00323715	0.00483813	0.00332064	0.00364391
201	11.527	152.029	1-methylhydantoin	66.3	HMDB0003646	Organoheterocyclic compounds	Azolines	Imidazolines	0.00066147	0.000621343	0.00057351	0.000577891	0.000581498	0.000650274	0.000848046	0.000758297	0.000814502	0.000703332	0.000739366	0.00077487	0.000730149	0.000760385	0.000669977	0.000630033	0.000738486	0.000596608	0.000629254	0.000587332	0.000578294	0.000607435	0.000557533	0.00060725	0.000670652	0.000616715	0.0006979	0.000556623	0.000565736	0.00049825	0.000481843	0.000488199	0.000444008	0.000469582	0.000516879
203	11.615	239.026	Dehydroabietic acid	64.8	HMDB0061925	Lipids and lipid-like molecules	Prenol lipids	Diterpenoids	0.000284633	0.00028199	0.00030859	0.000301967	0.000299809	0.000243614	0.000322414	0.000272421	0.000226474	0.000263977	0.000233443	0.000252976	0.000251163	0.000253124	0.000260153	0.000233536	0.000251468	0.000219737	0.000259912	0.000255808	0.000254835	0.000223215	0.000253076	0.000212889	0.000288533	0.000246712	0.000247055	0.000272412	0.000231599	0.000255988	0.000242597	0.000271771	0.000260904	0.000237115	0.000257905
204	11.64	292.1	4-deoxyerythronic acid	98.8	HMDB0000498	Organic oxygen compounds	Organooxygen compounds	Carbohydrates and carbohydrate conjugates	0.000723107	0.000736938	0.000766494	0.000765964	0.000757338	0.000887361	0.000913222	0.000807953	0.000542736	0.00100251	0.000541475	0.00137875	0.00040324	0.000460022	0.000671564	0.0010462	0.00251236	0.000642313	0.000437208	0.000938688	0.000587044	0.000258899	0.00068265	0.000746191	0.000474152	0.00101497	0.000497121	0.000595371	0.000932018	0.000714961	0.000593845	0.000565998	0.00100095	0.000776119	0.000554363
206	11.672	147.1	Isocitric acid	89	HMDB0000193	Organic acids and derivatives	Carboxylic acids and derivatives	Tricarboxylic acids and derivatives	0.00687772	0.00842433	0.00762226	0.00780842	0.00778185	0.00622586	0.00733467	0.0060478	0.0062869	0.00346705	0.00674036	0.00429487	0.00851227	0.00953504	0.00885456	0.00724569	0.0056798	0.00788264	0.00617309	0.00859699	0.00581355	0.00529569	0.00846098	0.0063058	0.00785095	0.00838395	0.00915525	0.00604447	0.0047871	0.00720255	0.00631278	0.00688905	0.005594	0.00604609	0.00647211
207	11.677	245.018	Fumaric acid	96	HMDB0000134	Organic acids and derivatives	Carboxylic acids and derivatives	Dicarboxylic acids and derivatives	0.00819569	0.00900503	0.00909523	0.00913442	0.00903642	0.00534096	0.00615258	0.004298	0.00568967	0.00403192	0.00608548	0.0049591	0.0110542	0.014143	0.00931239	0.00754258	0.0046106	0.00798854	0.00501405	0.00859373	0.0052077	0.00441391	0.00885792	0.006103	0.00895977	0.00796904	0.0118723	0.00569754	0.00557999	0.00743713	0.00565285	0.00847784	0.00399727	0.00529802	0.00706234
208	11.727	358.973	L-cysteine-glycine	77.8					0.000202267	0.000164818	0.000165604	0.00018235	0.000181379	0.000166006	0.000528405	0.000387252	0.000284112	0.000252542	0.000260977	0.00023342	0.000201815	0.000216851	0.000181408	0.000198565	0.000180329	0.000239013	0.000174024	0.000174086	0.000193012	0.000204673	0.000188533	0.000191007	0.000175997	0.00017388	0.000186615	0.000154291	0.000199904	0.000194297	0.000189407	0.000218035	0.000221295	0.000185056	0.000198411
210	11.76	340.1	Formononetin	78.9	HMDB0005808	Phenylpropanoids and polyketides	Isoflavonoids	O-methylated isoflavonoids	0.00776855	0.00815769	0.00835696	0.00838193	0.00831256	0.00984333	0.00620339	0.00908076	0.00855635	0.00750422	0.0112109	0.00607711	0.00755261	0.00933989	0.00865724	0.00679834	0.00896457	0.00880753	0.00633777	0.00729081	0.00794476	0.00730613	0.00767671	0.00544131	0.00695465	0.00703813	0.00681608	0.00774434	0.00677623	0.0072511	0.00732165	0.00810695	0.00760219	0.0070396	0.00769735
211	11.787	204.1	Serine	96.7	HMDB0000187	Organic acids and derivatives	Carboxylic acids and derivatives	Amino acids, peptides, and analogues	0.183658	0.190318	0.192583	0.192286	0.191408	0.21459	0.157215	0.197475	0.140859	0.155011	0.152085	0.208591	0.199692	0.260293	0.247035	0.168333	0.212374	0.224264	0.158305	0.195388	0.144437	0.21998	0.13994	0.191838	0.196474	0.156232	0.195562	0.207224	0.145945	0.149972	0.171824	0.14924	0.176034	0.129731	0.13601
212	11.806	293.087	L-cystathionine	68.7	HMDB0000099	Organic acids and derivatives	Carboxylic acids and derivatives	Amino acids, peptides, and analogues	0.000233704	0.000294815	0.000338979	0.000313288	0.00030728	0.000285537	0.000238672	0.000259084	0.000228928	0.000192971	0.000210676	0.000262896	0.000245117	0.000260733	0.000296164	0.000274217	0.000267931	0.0002244	0.000244218	0.000243307	0.000262882	0.000298671	0.000269243	0.00027032	0.000295187	0.000281133	0.000272218	0.000309564	0.000254629	0.000309424	0.000264127	0.00029223	0.000277508	0.000295678	0.00027828
213	11.863	215.102	Pelargonic acid	91.9	HMDB0000847	Lipids and lipid-like molecules	Fatty Acyls	Fatty acids and conjugates	0.00223747	0.0023292	0.00243846	0.0024107	0.00240446	0.00194234	0.00208535	0.0018171	0.00207319	0.00215462	0.0019379	0.00235051	0.00217897	0.00193899	0.00234637	0.00206241	0.00208105	0.00227505	0.00208528	0.00191395	0.00210938	0.00229703	0.00218701	0.0016252	0.00200086	0.00238421	0.00240764	0.00203293	0.00224698	0.00222701	0.00234657	0.00184577	0.00239762	0.00205241	0.00226809
215	11.902	185.004	2-piperidinobenzonitrile	81.7					0.00107366	0.00144287	0.00172657	0.00168404	0.0016388	0.00140803	0.000963212	0.000983606	0.000925897	0.00102171	0.00106461	0.00121878	0.00120561	0.00127773	0.00129177	0.00124528	0.00141554	0.00183735	0.00185122	0.00192802	0.00192554	0.0018547	0.00191624	0.00151558	0.00156591	0.00154476	0.00171018	0.00153103	0.0016184	0.00198804	0.00200172	0.00215545	0.00201978	0.00212147	0.00227857
217	11.988	141.065	5,6-dihydrouracil	71	HMDB0000076	Organoheterocyclic compounds	Diazines	Pyrimidines and pyrimidine derivatives	0.000524243	0.000537905	0.000569484	0.000562997	0.000562625	0.000756408	0.000544479	0.000701239	0.000432164	0.000451455	0.000543497	0.000626413	0.000396581	0.000726847	0.000538955	0.000616146	0.000515472	0.000656957	0.00048925	0.00051423	0.000505554	0.000499929	0.000432306	0.000581422	0.000508379	0.000466662	0.000513674	0.000412161	0.000474025	0.000417194	0.000376363	0.000402432	0.000504556	0.00049138	0.000472971
219	12.082	308.047	Ferulic acid	72.5	HMDB0000954	Phenylpropanoids and polyketides	Cinnamic acids and derivatives	Hydroxycinnamic acids and derivatives	9.26571e-05	0.000119531	0.000122933	0.000132847	0.000128503	0.0014095	0.00151924	0.00103375	0.000260615	0.000316671	0.000404292	0.000508024	0.000234205	4.69861e-05	0.000745393	0.000258304	0.000238762	0.000598191	3.17364e-05	0.000186499	5.98211e-05	4.41828e-05	0.000723964	0.000126249	1.22233e-05	0.000185061	0.000116036	2.46069e-05	4.65088e-05	0.000117751	6.37482e-05	3.75974e-05	9.71699e-05	0.000285741	6.31092e-05
220	12.196	218.1	L-threonine	99.3	HMDB0000167	Organic acids and derivatives	Carboxylic acids and derivatives	Amino acids, peptides, and analogues	0.0725326	0.0759557	0.0774148	0.076954	0.0765633	0.183801	0.109736	0.171	0.043588	0.0545086	0.0752549	0.0869189	0.0586504	0.0861769	0.0844365	0.0781037	0.0680504	0.0720995	0.0531549	0.070947	0.0567249	0.0599585	0.0500974	0.0608418	0.091051	0.0543971	0.11025	0.0805476	0.0499714	0.084687	0.0447215	0.0577266	0.0478703	0.0733807	0.0530098
224	12.286	198.005	Allothreonine	73.9					0.000612238	0.000646501	0.000679045	0.000656191	0.000656722	0.000534724	0.000749722	0.000565474	0.000573038	0.000563801	0.000680224	0.000768211	0.000724876	0.00057102	0.000631856	0.000526125	0.00070515	0.000832995	0.000617072	0.000562164	0.000530861	0.00061143	0.000499517	0.000498667	0.000596471	0.000561624	0.000655895	0.000494953	0.000556952	0.000606499	0.000375022	0.00063731	0.000450717	0.000566865	0.000777047
227	12.434	305.06	Malonic acid	83.4	HMDB0000691	Organic acids and derivatives	Carboxylic acids and derivatives	Dicarboxylic acids and derivatives	0.000216136	0.00023266	0.000229756	0.000225754	0.000224298	0.000169959	0.000281866	0.000163769	0.00018602	0.00017974	0.000178054	0.000172599	0.000274582	0.000173331	0.00021662	0.000218784	0.000262275	0.000214407	0.000396388	0.000240236	0.000318037	0.000230436	0.000269166	0.00015547	0.000202	0.000177682	0.000191428	0.000165472	0.000209502	0.000199576	0.000234893	0.00030691	0.000170183	0.000230757	0.000304286
230	12.476	180.01	1,2,4-benzenetriol	74.2	HMDB0124831	Benzenoids	Phenols	Benzenetriols and derivatives	0.000116783	0.000124605	0.000132553	0.0001424	0.000138979	0.00016712	9.19527e-05	0.000129559	9.5983e-05	8.60125e-05	0.000143886	0.000142755	0.000164522	0.000182621	0.000159665	0.000115699	0.000136495	0.000266001	0.000422391	0.000399734	0.000335168	0.000275485	0.000202832	0.000236723	0.000224468	0.00012483	0.000407467	0.000343548	0.000737844	0.000281262	0.000230419	0.000252912	0.000214329	0.000167115	9.59946e-05
231	12.574	261.045	Glutaric acid	93.2	HMDB0000661	Organic acids and derivatives	Carboxylic acids and derivatives	Dicarboxylic acids and derivatives	0.000148907	0.000145666	0.000161471	0.000152124	0.000153266	0.00032221	0.000125923	0.000311172	0.000160545	8.02377e-05	0.000181205	0.000235956	8.80141e-05	0.00011633	6.97898e-05	7.84688e-05	0.000112432	9.02909e-05	0.000135207	0.0001345	0.000102222	0.000254014	9.85626e-05	0.000349886	0.000177925	0.00015038	0.000107162	9.35901e-05	0.000135012	0.00027592	0.000113046	0.000128645	8.86828e-05	8.79925e-05	6.47512e-05
233	12.65	270.073	Harmol	73.8	HMDB0034217	Alkaloids and derivatives	Harmala alkaloids		0.000279478	0.00028105	0.000252143	0.000267508	0.000267146	0.000332914	0.000194174	0.000313544	0.000220761	0.000145676	0.000291628	0.000271517	0.000325446	0.000354964	0.000350415	0.000222357	0.000313695	0.000320304	0.000488083	0.000336498	0.000367645	0.000332596	0.00025875	0.000158427	0.000311021	0.000253223	0.000342738	0.000187763	0.000162093	0.00023615	0.000158716	0.00040201	0.000153081	0.000225057	0.000262142
234	12.694	229.047	Aconitic acid	76.3	HMDB0000072	Organic acids and derivatives	Carboxylic acids and derivatives	Tricarboxylic acids and derivatives	0.000257076	0.00024847	0.000266325	0.00027419	0.000270082	0.000318242	0.000246369	0.00025308	0.000215402	0.000219619	0.00023131	0.000239045	0.000200759	0.000273276	0.000242663	0.000240457	0.000280134	0.000312993	0.00023261	0.000269953	0.000234624	0.000267824	0.000246642	0.000218565	0.00027579	0.000227715	0.000273744	0.000204874	0.000232575	0.000280474	0.000227684	0.000285811	0.000233505	0.000249332	0.000277739
236	12.947	174.1	3-aminoisobutyric acid	92.4	HMDB0003911	Organic acids and derivatives	Carboxylic acids and derivatives	Amino acids, peptides, and analogues	0.108596	0.111985	0.112609	0.113598	0.113132	0.119371	0.107489	0.111482	0.112922	0.130284	0.103854	0.109507	0.104438	0.13942	0.107717	0.127822	0.141027	0.115488	0.107962	0.139394	0.138157	0.116861	0.131729	0.107705	0.115466	0.113557	0.119963	0.111652	0.111141	0.111901	0.108806	0.139931	0.139071	0.109554	0.106257
237	13.011	94.0455	L-histidine	77	HMDB0000177	Organic acids and derivatives	Carboxylic acids and derivatives	Amino acids, peptides, and analogues	0.00125775	0.00139018	0.00143843	0.00142503	0.00141476	0.00142431	0.00158252	0.0014567	0.00161639	0.00150547	0.00170999	0.00143612	0.00128889	0.00120416	0.00115086	0.00128254	0.00126208	0.00154869	0.00148444	0.0015825	0.00129606	0.00145795	0.00108442	0.00160791	0.00176175	0.00152877	0.00170055	0.00123033	0.00173659	0.00141569	0.00130337	0.00125705	0.00122181	0.00120723	0.00119876
239	13.109	243.06	Noradrenaline	80.7	HMDB0000216	Benzenoids	Phenols	Benzenediols	0.000899219	0.00128727	0.00142233	0.00140641	0.00137321	0.00124746	0.000698463	0.000696639	0.00074627	0.00082093	0.000901322	0.001238	0.00105955	0.00108725	0.00107779	0.00101696	0.00115205	0.00141433	0.00135205	0.00146915	0.00150847	0.00148489	0.00152776	0.00122123	0.00140744	0.00137936	0.00145159	0.00134169	0.00126398	0.00159302	0.00159055	0.00178278	0.00177928	0.00177833	0.00181718
241	13.243	218.104	Homoserine	81.1	HMDB0000719	Organic acids and derivatives	Carboxylic acids and derivatives	Amino acids, peptides, and analogues	0.00108459	0.00117203	0.00112593	0.00118761	0.00115929	0.00134345	0.00129506	0.00115875	0.00112335	0.000801485	0.00100012	0.00143113	0.00119805	0.0012465	0.000756796	0.0011735	0.00157645	0.00101594	0.0011954	0.00153261	0.00127338	0.00147385	0.00126894	0.00141115	0.00115033	0.00107933	0.00136876	0.000402742	0.000987272	0.000877282	0.00100456	0.000732562	0.000956215	0.00074333	0.00103242
243	13.28	350.1	Phosphenodiimidic amide	79.5					0.0102206	0.0119246	0.0130669	0.0129661	0.0126889	0.0115412	0.00841212	0.0096445	0.00976936	0.00764123	0.00961869	0.0105638	0.00962329	0.0103914	0.0108942	0.0104255	0.0111985	0.0101029	0.00900843	0.0104882	0.0112386	0.0119342	0.0116213	0.00984177	0.0115662	0.0111061	0.0109384	0.0100871	0.0102568	0.0118399	0.0106394	0.0115517	0.0101121	0.0110857	0.0110984
245	13.311	251.998	Quinolinic acid	68.4	HMDB0000232	Organoheterocyclic compounds	Pyridines and derivatives	Pyridinecarboxylic acids and derivatives	0.000353505	0.000285157	0.000251855	0.000298357	0.000297717	0.000415578	0.000674807	0.000649682	0.000599259	0.00043562	0.000729162	0.000139945	0.00018527	0.000296483	0.000319157	0.000319128	0.000338144	0.000157893	0.000264995	0.000292427	0.000336384	0.000349991	0.000176458	0.000230412	0.000430248	0.000332317	0.000361473	0.000213523	0.000176755	0.000281921	0.000214177	0.000290693	0.000177105	0.000186529	0.000170577
252	13.534	211	Phosphoenolpyruvate	80.6	HMDB0000263	Organic acids and derivatives	Organic phosphoric acids and derivatives	Phosphate esters	0.00123576	0.0013763	0.00122714	0.00136544	0.00136551	0.00140936	0.00126942	0.0012033	0.000962644	0.00102709	0.00123824	0.00100142	0.00137371	0.0013443	0.00135492	0.00114188	0.00144764	0.0014695	0.00128041	0.00121832	0.00120278	0.001519	0.00117827	0.00135781	0.00174291	0.00146726	0.00196991	0.00114814	0.00110741	0.0013063	0.00117697	0.00132932	0.0010514	0.00117481	0.00134771
253	13.557	218.098	Aminomalonate	91.4	HMDB0001147	Organic acids and derivatives	Carboxylic acids and derivatives	Amino acids, peptides, and analogues	0.00549499	0.00630774	0.00671494	0.00654741	0.0064594	0.00758153	0.00347512	0.00605886	0.00326678	0.00342469	0.00443589	0.00420093	0.00320513	0.00634685	0.0054829	0.00441338	0.00493169	0.00783153	0.00380668	0.00564857	0.00453686	0.00546734	0.00409499	0.00393462	0.00611735	0.00314314	0.00753196	0.00357384	0.00361351	0.00518332	0.00367209	0.00339642	0.00340022	0.00397703	0.00329864
258	13.704	281.021	Beta-hydroxymyristic acid	78	HMDB0010731	Lipids and lipid-like molecules	Fatty Acyls	Fatty acids and conjugates	0.000317221	0.00036413	0.000345787	0.000356392	0.000350074	0.000374725	0.000300185	0.000314368	0.000382566	0.000306188	0.000374782	0.000401054	0.000334412	0.00041956	0.00033492	0.000329602	0.000412452	0.000476247	0.000454267	0.000453529	0.000427943	0.000424923	0.000443156	0.000371455	0.000370593	0.000380928	0.000446334	0.000328457	0.000422192	0.000372787	0.000423803	0.000439214	0.000423907	0.000381946	0.000464603
259	13.716	160.017	N-methyldiethanolamine	87.3					0.00402184	0.00420816	0.00422088	0.00417313	0.00416933	0.00569728	0.000413848	0.00562551	0.000898597	0.00152766	0.000712785	0.00983384	0.00308684	0.0060177	0.0057202	0.00760688	0.00231645	0.00257215	0.00336436	0.00199448	0.00235144	0.00336133	0.00176623	0.00491878	0.00199494	0.00351381	0.0076484	0.00366813	0.000671851	0.00113395	0.0018098	0.00182941	0.00284693	0.00238333	0.00188809
261	13.808	179.009	Nicotinamide	95.7	HMDB0001406	Organoheterocyclic compounds	Pyridines and derivatives	Pyridinecarboxylic acids and derivatives	0.066402	0.0686063	0.0693558	0.0692076	0.0689143	0.0728832	0.0881368	0.0699641	0.072531	0.0767469	0.0691701	0.0747755	0.0749993	0.0603203	0.0791128	0.0751247	0.0978334	0.0952318	0.0640652	0.067224	0.0642608	0.0664011	0.0645037	0.065822	0.0571306	0.0737748	0.0647573	0.0540661	0.0716268	0.0690456	0.0711498	0.0665707	0.0662134	0.0674228	0.071403
262	13.848	147.025	Malic acid	97	HMDB0000156	Organic acids and derivatives	Hydroxy acids and derivatives	Beta hydroxy acids and derivatives	0.0296694	0.0295594	0.030105	0.0299623	0.0299689	0.015425	0.0264023	0.0164739	0.0227929	0.0149685	0.0223541	0.0210709	0.0464394	0.0478428	0.037696	0.0302487	0.0203661	0.0254817	0.0163425	0.0323009	0.0208125	0.0177374	0.031455	0.0231599	0.0331244	0.0316519	0.0476685	0.0268405	0.0237592	0.02995	0.0223989	0.0366419	0.0143956	0.0228529	0.0284907
263	13.892	174.1	N-acetylornithine	87.5	HMDB0003357	Organic acids and derivatives	Carboxylic acids and derivatives	Amino acids, peptides, and analogues	0.0020167	6.17127e-05	0.00263706	0.00222582	0.00206669	0.00228569	0.00166418	0.00175012	0.00182798	0.00187058	0.00199029	0.00191508	0.00214086	0.00204466	0.00216994	0.00218019	0.00232928	0.00270367	0.00278508	0.000109146	0.00290239	0.00267025	0.0029591	0.00215529	0.00240145	0.00238354	0.00236496	0.00244353	0.00222337	9.73038e-05	0.0027561	0.00287978	0.00300028	0.00291321	0.00304036
264	13.923	271.1	Kojic acid	75.6	HMDB0032923	Organoheterocyclic compounds	Pyrans	Pyranones and derivatives	0.00807588	0.0081511	0.00689442	0.00750492	0.00743224	0.00816395	0.00726388	0.00623223	0.00947799	0.00858557	0.0106857	0.00861794	0.00908616	0.0102962	0.00810284	0.00785531	0.00956621	0.0114225	0.00897906	0.0110021	0.0102505	0.0102907	0.0107731	0.00713527	0.0095839	0.00898697	0.00957663	0.0059838	0.00854869	0.00889574	0.00854871	0.00829482	0.00809318	0.00700639	0.0076121
265	13.926	85.0913	Tetracosane	90.4					0.00317322	0.00299042	0.00309576	0.00312101	0.00309848	0.0029418	0.00260607	0.0029441	0.00302266	0.00305747	0.00321279	0.00293131	0.00298169	0.00313926	0.00289437	0.00301536	0.00304646	0.00317439	0.003127	0.00300399	0.00291383	0.00320072	0.00297352	0.00295306	0.0030941	0.00311433	0.0031265	0.00301276	0.00295751	0.00317642	0.002982	0.00288635	0.00315902	0.00291679	0.000996011
266	13.955	235.119	Myo-inositol	72.4	HMDB0000211	Organic oxygen compounds	Organooxygen compounds	Alcohols and polyols	0.000535945	0.000595295	0.000570622	0.000574494	0.000573192	0.00058124	0.000594075	0.00054848	0.000566409	0.000552499	0.000563858	0.000585271	0.000538477	0.000564928	0.000625833	0.000555141	0.000577822	0.000593263	0.000603376	0.000596447	0.00061359	0.000588022	0.000581481	0.000586976	0.000553789	0.00053827	0.000562868	0.000601899	0.000594847	0.000576579	0.000611073	0.000594059	0.000581828	0.000589339	0.000564373
267	13.982	207.067	3,5-dimethyl-benzoic acid	87.8					0.000593726	0.00065704	0.000633812	0.000639788	0.000637041	0.000186418	0.001009	0.000152278	0.000500467	0.00098834	0.00100386	0.00102819	0.000315678	0.000179371	0.00039206	0.000347772	0.000864293	0.00086211	0.000725997	0.000537107	0.000731543	0.00110344	0.000599774	0.000741269	0.000570173	0.000488083	0.000782433	0.000272256	0.000368385	0.000387033	0.000408988	0.000283728	0.000242914	0.000254295	0.000728361
269	14.084	232.102	Serotonin	82.6	HMDB0000259	Organoheterocyclic compounds	Indoles and derivatives	Tryptamines and derivatives	0.000561783	0.000558057	0.000557423	0.000574104	0.00057454	0.000654415	0.000471249	0.000548928	0.000628703	0.000437359	0.000652043	0.000757628	0.00060603	0.000681811	0.000695146	0.000605494	0.000637883	0.000503965	0.000442793	0.00063862	0.000559535	0.000591625	0.00053903	0.000693723	0.000612813	0.000564328	0.00066739	0.000531558	0.000688492	0.000511355	0.000579158	0.000513623	0.000621121	0.000468508	0.00053881
271	14.121	174.1	N-acetylputrescine	89.3	HMDB0002064	Organic acids and derivatives	Carboximidic acids and derivatives	Carboximidic acids	0.00903225	0.0104934	0.0116439	0.0116049	0.0113807	0.0100919	0.00869964	0.00843748	0.00849074	0.00860821	0.00860526	0.00895334	0.00923737	0.00951815	0.00967512	0.00974532	0.0099284	0.0112875	0.0112953	0.0112113	0.0115416	0.0113228	0.0117577	0.00950185	0.0104039	0.0100484	0.0103441	0.0105194	0.0100621	0.0116666	0.0113594	0.0122613	0.0122516	0.0120928	0.0119583
274	14.334	147	Citraconic acid	72.5	HMDB0000634	Lipids and lipid-like molecules	Fatty Acyls	Fatty acids and conjugates	0.047155	0.000359322	0.000351755	0.0292218	0.0251812	0.000358325	0.000168094	0.0425635	0.023458	0.000174807	0.0239317	0.0603302	0.000395137	0.000182715	0.0654655	0.0399342	0.055835	0.0505029	0.0373518	0.0334396	0.000420924	0.0432074	0.0325334	0.0385019	0.0498259	0.0440774	0.0600688	0.000207585	0.000352839	0.000162175	0.029939	0.0352055	0.0365658	0.000474662	0.0388242
275	14.343	176.1	L-methionine	94.5	HMDB0000696	Organic acids and derivatives	Carboxylic acids and derivatives	Amino acids, peptides, and analogues	0.0245592	0.0248515	0.0245009	0.024356	0.0243815	0.0276098	0.0130355	0.0250328	0.0118128	0.0181208	0.0109378	0.0314453	0.0238158	0.0493919	0.0446493	0.0351325	0.0278024	0.035347	0.0185875	0.0263971	0.0217609	0.0324215	0.0208104	0.0213817	0.0178951	0.0267584	0.0194278	0.0280318	0.0182203	0.0259659	0.0199163	0.0223787	0.0259697	0.0262861	0.0267751
276	14.364	232.1	L-aspartic acid	99.4	HMDB0000191	Organic acids and derivatives	Carboxylic acids and derivatives	Amino acids, peptides, and analogues	0.0797127	0.0832981	0.0842706	0.0837142	0.083396	0.057139	0.043343	0.0522069	0.0353625	0.0650857	0.0439735	0.13772	0.0476642	0.0769102	0.0901879	0.0491993	0.128842	0.0671832	0.0409953	0.0584421	0.0494659	0.0936633	0.0505525	0.0498212	0.0660728	0.0754475	0.0773477	0.0674458	0.0318136	0.0646118	0.0577102	0.05141	0.074958	0.0654004	0.0787648
277	14.38	156.098	Oxoproline	93.2	HMDB0000267	Organic acids and derivatives	Carboxylic acids and derivatives	Amino acids, peptides, and analogues	0.180396	0.185348	0.18797	0.186747	0.185932	0.199072	0.140678	0.184385	0.109257	0.137578	0.0865841	0.18462	0.209652	0.277128	0.261776	0.159252	0.170308	0.202329	0.169736	0.11674	0.121425	0.132314	0.124238	0.16292	0.226841	0.165676	0.270586	0.204567	0.0816014	0.118367	0.103443	0.141446	0.118889	0.118153	0.131124
279	14.451	230.1	4-hydroxyproline	96.4	HMDB0000725	Organic acids and derivatives	Carboxylic acids and derivatives	Amino acids, peptides, and analogues	0.0487817	0.0501182	0.05087	0.0504292	0.0502444	0.0714265	0.0518508	0.0663911	0.0374035	0.0766549	0.0744193	0.0591282	0.0408655	0.0401943	0.0783077	0.0386655	0.0451474	0.0197361	0.0251612	0.0336749	0.0417774	0.0331243	0.0382455	0.0352448	0.0365442	0.055877	0.0577737	0.0204111	0.0306663	0.053623	0.0385496	0.0345793	0.0343734	0.056894	0.033007
282	14.476	113	Glycerol-3-galactoside	74.5					0.0758609	0.0492409	0.0479164	0.0468522	0.0503457	0.0562377	0.0592129	0.0424028	0.0792227	0.0747799	0.0839032	0.0401219	0.0513686	0.0733469	0.0398763	0.0485156	0.047427	0.0610417	0.0377609	0.039901	0.0359072	0.0428613	0.0373338	0.0448928	0.0585056	0.0360942	0.0502391	0.0339754	0.043067	0.0368515	0.028485	0.0321854	0.027861	0.0181321	0.0193358
284	14.526	174.1	4-aminobutyric acid	74.5	HMDB0000112	Organic acids and derivatives	Carboxylic acids and derivatives	Amino acids, peptides, and analogues	0.00348174	0.00346328	0.00355881	0.00355286	0.00354752	0.00370354	0.0038414	0.00349413	0.00531377	0.00217775	0.00549911	0.00350664	0.0036291	0.00370071	0.00175923	0.00251415	0.00499408	0.00155246	0.00433196	0.00349526	0.00282887	0.00523173	0.00363212	0.00215931	0.0142258	0.00308873	0.00433154	0.00144324	0.0038347	0.00224439	0.00284986	0.00327486	0.00250884	0.00212676	0.00318168
286	14.582	447.1	3,17,20-trihydroxy-pregn-5-en-11-one	70.2					0.00134596	0.00136787	0.00110068	0.00121138	0.00123279	0.00168896	0.00264622	0.0023614	0.00161949	0.00156747	0.00157516	0.00135364	0.00140657	0.00158866	0.00167876	0.00153865	0.00162106	0.00133659	0.0013125	0.00129242	0.00124364	0.00101731	0.00111478	0.00136269	0.00129658	0.0012341	0.00142147	0.00119489	0.000975562	0.00118145	0.00092053	0.00108698	0.000927539	0.00104324	0.00120815
289	14.655	113	Thymine	72.8	HMDB0000262	Organoheterocyclic compounds	Diazines	Pyrimidines and pyrimidine derivatives	0.121262	0.155424	0.173136	0.151184	0.162126	0.0707252	0.0732996	0.283961	0.291377	0.071231	0.321478	0.0701415	0.120324	0.136805	0.0939501	0.27769	0.0855943	0.211122	0.394419	0.39759	0.196323	0.0856261	0.108378	0.0603168	0.078724	0.134136	0.0763129	0.0815185	0.066416	0.0746015	0.13117	0.0790573	0.141131	0.136105	0.166079
290	14.66	292.1	Erythronic acid	93.9	HMDB0000613	Organic oxygen compounds	Organooxygen compounds	Carbohydrates and carbohydrate conjugates	0.00251018	0.0026033	0.00266997	0.00265897	0.00263965	0.00486732	0.00330748	0.0045875	0.00313586	0.00160315	0.00248421	0.00486182	0.00195296	0.0024121	0.00218803	0.00180094	0.00195262	0.00221784	0.00161783	0.00253651	0.00198661	0.00123776	0.00123554	0.00371036	0.00260365	0.00262603	0.0066988	0.00076464	0.00130413	0.00237569	0.00276927	0.00125248	0.0017003	0.00104234	0.00122658
291	14.676	263.141	2,6-bis(tert-butyl)phenol	83.2					0.00105544	0.00112029	0.001146	0.00113963	0.00113539	0.00100548	0.00105121	0.000948482	0.00105499	0.00103845	0.0011212	0.0010463	0.000988399	0.00091119	0.00102357	0.00100767	0.0010382	0.0010194	0.00114502	0.00107324	0.00113002	0.00107879	0.00104741	0.00100721	0.00100538	0.00109188	0.0010339	0.000997507	0.00099872	0.00105739	0.000995683	0.000966031	0.00102133	0.000979668	0.00105955
296	14.832	115.1	Creatinine	92.5	HMDB0000562	Organic acids and derivatives	Carboxylic acids and derivatives	Amino acids, peptides, and analogues	0.729991	0.722239	0.702814	0.708087	0.711103	0.767257	0.000119226	0.775004	0.876033	0.721241	0.86866	0.825385	0.755687	0.800673	0.703269	3.07371e-05	0.753753	1.28524e-05	0.694763	0.830299	0.755988	0.735603	0.728682	0.716484	0.758706	0.709016	0.795996	0.609026	0.784088	7.96435e-05	0.683823	0.679205	0.698642	8.47851e-05	0.693135
298	14.855	228.1	2-deoxyerythritol	78.2					0.013984	0.0123676	0.0132859	0.00856935	0.00989799	0.0017266	0.00307005	0.0306569	0.00222732	0.0107511	0.00259048	0.011966	0.0112453	0.00229561	0.0091701	0.0183514	0.00278168	0.0146412	0.013611	0.000992177	0.00136003	0.00175817	0.0148321	0.0116307	0.0111885	0.0206467	0.0016921	0.0160591	0.00217694	0.00124335	0.0127914	0.00162051	0.0214052	0.00137026	0.00118816
302	14.913	292.095	Isothreonic acid	79.6					9.34462e-05	0.000634111	0.000639676	0.000532553	0.000508506	0.00117601	0.00034543	0.00116816	0.00035895	0.000544472	0.000263061	0.00114493	0.000673089	0.000717004	0.00101107	0.000949755	0.000465983	0.000424244	0.000574991	0.000371969	0.000412933	0.00063546	0.000320019	0.00101424	0.000656997	0.00058705	0.0012265	0.000849662	0.00032018	0.00037473	0.000899723	0.000430004	0.000448847	0.000892955	0.000462761
303	14.916	314.1	Dehydroascorbic acid	90.4	HMDB0001264	Organoheterocyclic compounds	Lactones	Gamma butyrolactones	0.177969	3.89056e-05	0.176608	0.140586	0.133593	0.189881	0.227305	4.81144e-05	0.232102	0.167245	0.230625	0.209706	0.18765	0.202358	0.000110659	0.162166	0.182598	6.80793e-05	0.165249	0.221166	0.194814	0.180015	3.68405e-05	0.171894	6.24087e-05	0.173895	0.200679	0.132905	0.201511	4.92277e-05	4.29741e-05	4.48826e-05	5.49964e-05	0.126498	0.162951
304	14.959	141.003	Pentobarbital	76.8	HMDB0014457	Organoheterocyclic compounds	Diazines	Pyrimidines and pyrimidine derivatives	0.00252035	0.00274763	0.00288595	0.00282102	0.00278777	0.00268947	0.00290029	0.00221223	0.00233081	0.00231249	0.00236196	0.00197367	0.0029522	0.00255089	0.00205646	0.00249132	0.00264536	0.00304722	0.00303038	0.00290195	0.00308565	0.00278095	0.00338745	0.00195917	0.00246505	0.00245135	0.00229531	0.00243645	0.00213709	0.00269499	0.00241552	0.00293026	0.00252437	0.00256216	0.00318445
308	15.039	141.003	Cyano-l-alanine	73.2					0.0104105	0.010486	0.0112144	0.0107401	0.0107004	0.00928819	0.0100167	0.00863525	0.00970142	0.00926708	0.00918438	0.00870623	0.00975833	0.00979099	0.00721543	0.00849045	0.00884733	0.0113863	0.011156	0.0105497	0.0110849	0.0106693	0.0112528	0.00836502	0.00979279	0.00944946	0.00988839	0.00814113	0.00871957	0.00776631	0.00909701	0.00930841	0.0089046	0.0084409	0.0103195
309	15.064	166.004	L-kynurenine	71.7	HMDB0000684	Organic oxygen compounds	Organooxygen compounds	Carbonyl compounds	0.000168441	0.000133275	0.000101449	0.000135343	0.000130655	0.000166449	0.000161404	0.000112444	9.76968e-05	0.000124339	0.000142842	0.000104071	9.69576e-05	0.000129182	0.000135386	0.0001223	9.14882e-05	0.000150127	0.000117911	0.000115449	4.66439e-05	0.000153669	4.83271e-05	0.000175522	9.35766e-05	0.000129477	0.000116435	0.000103616	2.54585e-05	0.00014123	0.000116014	0.000127508	9.38971e-05	9.95627e-05	0.000116928
311	15.102	240.061	1,5-anhydroglucitol	77.8	HMDB0002712	Organic oxygen compounds	Organooxygen compounds	Carbohydrates and carbohydrate conjugates	0.000333438	0.00032258	0.000335786	0.000310542	0.000318798	0.000345358	0.000478937	0.000382356	0.000365957	0.000367222	0.000417527	0.000460007	0.000392623	0.000363736	0.000356297	0.000285008	0.000451996	0.000391702	0.000320362	0.000289102	0.000296032	0.000269328	0.000275927	0.000283152	0.000356584	0.000307268	0.000386329	0.000283993	0.000303397	0.000281378	0.000197516	0.000278732	0.000206355	0.000265549	0.000290935
312	15.143	185.096	Naproxen	78.3	HMDB0001923	Benzenoids	Naphthalenes		0.000689925	0.000792132	0.000720393	0.000776402	0.000780129	0.00176055	0.00132899	0.00174923	0.000284645	0.00081068	0.000686887	0.00116932	0.000445401	0.000471401	0.00105514	0.000881016	0.000362057	0.000763238	0.00015453	0.000648393	0.000373988	0.000134904	0.000988497	0.000847037	0.000136323	0.000371657	0.000697422	0.000112832	0.000171186	0.000315284	0.000256093	0.00019493	0.000187528	0.00038989	0.000330621
313	15.176	247.097	L-2-hydroxyglutaric acid	96.4	HMDB0000694	Organic acids and derivatives	Hydroxy acids and derivatives	Short-chain hydroxy acids and derivatives	0.000927066	0.000901127	0.000939515	0.000924203	0.000924668	0.000870693	0.0010252	0.000772171	0.00130813	0.000562272	0.00100586	0.000704089	0.000788648	0.000905349	0.000437105	0.000546481	0.000756883	0.00106415	0.00108086	0.00130641	0.000579626	0.00102289	0.00131504	0.00067476	0.00134894	0.000838769	0.00123989	0.000407781	0.00102082	0.000674106	0.000556251	0.000630497	0.000419831	0.000574695	0.000982531
315	15.189	299.04	D-ribose-5-phosphate	79.2					0.00134117	0.00124486	0.000922681	0.00101283	0.00103635	0.000822421	0.00125135	0.000855272	0.000830138	0.000951061	0.000951648	0.00131183	0.00116234	0.000997114	0.0012869	0.000823033	0.000750708	0.000583578	0.000349702	0.000581797	0.000501154	0.000456806	0.000313328	0.000927111	0.00101299	0.00080349	0.00152643	0.000574124	0.000527199	0.000462523	0.000417139	0.000470832	0.000313467	0.000369198	0.00055397
317	15.256	171.076	Glycocyamine	90.4	HMDB0000128	Organic acids and derivatives	Carboxylic acids and derivatives	Amino acids, peptides, and analogues	0.00256378	0.00279179	0.00265788	0.0027201	0.00269321	0.00430182	0.00371982	0.00331116	0.00289117	0.00319817	0.00395196	0.0049394	0.00285137	0.00264736	0.00363047	0.00250584	0.00395996	0.00371368	0.00301527	0.00329803	0.00334853	0.00274274	0.0032693	0.00219886	0.00259454	0.00277039	0.00308154	0.00221488	0.00270674	0.00301449	0.00235398	0.00319094	0.0022692	0.00264965	0.00270483
320	15.308	193.05	2-hydroxy-2-phenylpropanoic acid	95.9	HMDB0142137	Benzenoids	Benzene and substituted derivatives		0.000419055	0.000436195	0.000402172	0.000433742	0.000431188	0.000211635	0.000233664	0.000203765	0.000305617	0.000219323	0.000233893	0.00045275	0.000213311	0.00153794	0.000201032	0.000628257	0.000210061	0.000376328	0.00022078	0.000695438	0.000217607	0.00036084	0.000237074	0.000271087	0.0002222	0.000193186	0.000692474	0.000187006	0.000389471	0.000436662	0.000409721	0.000272923	0.000285748	0.00022098	0.000286165
321	15.378	227.1	L-glutamine dehydrated	87.8					0.00293407	0.00340812	0.00406625	0.00385011	0.00365555	0.00619653	0.00103007	0.00181047	0.00110508	0.00214478	0.00240962	0.00486379	0.00154555	0.00245126	0.00480818	0.00213229	0.00292482	0.0046741	0.000322265	0.00223245	0.00232509	0.00220164	0.00635192	0.00117026	0.00462929	0.000512177	0.00415025	0.000375503	0.000230707	0.000598512	0.000308204	0.000319732	0.000306973	0.000241498	0.000266985
322	15.381	147.1	Chlorogenic acid	71.7	HMDB0003164	Organic oxygen compounds	Organooxygen compounds	Alcohols and polyols	0.000351173	0.000219217	0.00030097	0.000363656	0.000296022	0.00133019	0.000454143	0.000678656	0.00036662	0.000466458	0.000122592	0.000842854	0.000171384	0.000780029	0.00198191	0.000515138	0.00053857	0.000493624	0.00782201	0.000641505	0.000506711	6.10006e-05	0.000589537	0.000123914	0.000827195	0.000208292	0.000716834	0.000147247	0.00229716	0.000296888	0.0042042	0.000354545	0.000245764	0.00013209	5.50945e-05
323	15.406	343.067	Guanidinosuccinate	65.5	HMDB0003157	Organic acids and derivatives	Carboxylic acids and derivatives	Amino acids, peptides, and analogues	0.000171936	0.000115881	0.000163281	0.000169631	0.000159134	0.000204231	0.000143484	0.000134602	0.000161441	0.000174913	0.000180468	0.000200069	0.000182467	0.000203223	0.000148072	0.000160082	0.000147068	0.000246474	0.000169179	0.000170746	0.000157239	0.000192985	0.000219404	0.000140685	0.000241996	0.000149851	0.000182032	0.00012255	0.000141722	0.000149602	0.000129761	0.000187907	0.000122779	0.000160491	0.000131398
324	15.418	216.094	5-methoxypsoralen	67.8	HMDB0030637	Phenylpropanoids and polyketides	Coumarins and derivatives	Furanocoumarins	0.000224487	0.000249062	0.000251492	0.000248819	0.000247085	0.000161668	0.000157719	0.000136631	0.00019045	0.000214581	0.000280396	0.000412403	0.000381981	0.000286044	0.000568491	0.000329072	0.000458751	0.000546138	0.000341705	0.000353589	0.000335115	0.000363868	0.000300735	0.000362365	0.000279845	0.000352988	0.000169895	0.000191703	0.000135679	0.00032168	0.000267226	0.000341884	0.000264784	0.000279423	0.000331339
325	15.443	214.08	Diclofenac	66.5	HMDB0014724	Benzenoids	Benzene and substituted derivatives	Halobenzenes	0.000351936	0.000340099	0.000341699	0.000346382	0.000348487	0.000108387	0.00103453	0.000119457	0.00115932	0.0009092	0.001543	0.000112357	0.000124699	9.70478e-05	8.04414e-05	9.91275e-05	0.000356198	9.21897e-05	0.000219034	0.000317155	0.000454455	0.000269845	0.000441429	0.000199872	0.00153421	0.000127296	0.000145796	8.4283e-05	0.00103462	0.000878724	0.00022807	0.00026823	0.000109983	9.27988e-05	0.000149054
328	15.537	188.1	Allantoin	88.6	HMDB0000462	Organoheterocyclic compounds	Azoles	Imidazoles	0.00826975	0.00899279	0.00958956	0.00942857	0.00930936	0.0204974	0.0150619	0.0172914	0.00634972	0.00801609	0.00725302	0.00649292	0.00406768	0.00805094	0.0120555	0.00710987	0.00617206	0.0092815	0.00467066	0.00589584	0.00446968	0.00391111	0.00696561	0.00365249	0.0117187	0.00409124	0.00773729	0.00383848	0.00337687	0.00634876	0.00292625	0.0074001	0.00283341	0.00348365	0.0054037
332	15.624	277.053	Indoxyl sulfate	68.5	HMDB0000682	Organic acids and derivatives	Organic sulfuric acids and derivatives	Arylsulfates	0.00028899	0.00020396	0.000168771	0.000210534	0.000206568	0.000327404	0.000469132	0.000388073	0.000360212	0.000305874	0.000308316	5.62767e-05	0.000345583	0.000319624	0.000243439	0.000272101	0.000344189	0.000301223	0.000328039	0.000290208	0.000234047	0.000285635	0.000265371	0.000249259	0.000287345	0.0002191	0.000274283	0.0001955	0.000226983	0.000200187	0.000214406	0.000225754	0.000203857	0.000196147	0.000239238
333	15.636	231.097	3-deoxyhexitol	77.5					0.000298003	0.000335571	0.000329954	0.000325993	0.000325849	0.000462185	0.00029695	0.000425421	0.000366347	0.000371963	0.000342244	0.000325376	0.000364228	0.000268522	0.000276972	0.00029031	0.000367946	0.00043248	0.000432973	0.00039502	0.000235269	0.000324713	0.00023124	0.000234862	0.00031513	0.000345826	0.00042109	0.000183699	0.000266438	0.000512001	0.000310286	0.000305955	0.000392975	0.000192589	0.000318711
335	15.713	335.115	Mucic acid	72.8	HMDB0000639	Organic oxygen compounds	Organooxygen compounds	Carbohydrates and carbohydrate conjugates	6.05206e-05	6.8115e-05	6.33219e-05	6.53558e-05	6.50994e-05	7.59231e-05	6.35282e-05	7.08294e-05	7.76e-05	0.000109447	5.72317e-05	0.00010331	9.60983e-05	7.42247e-05	0.000158436	8.87817e-05	0.00012765	0.000126246	9.07037e-05	0.000101637	8.29091e-05	6.78466e-05	5.63953e-05	5.66313e-05	8.48008e-05	8.4757e-05	6.19211e-05	5.73036e-05	2.89679e-05	9.53002e-05	5.09328e-05	0.000101498	6.40901e-05	7.99435e-05	6.64294e-05
338	15.838	246.1	L-glutamic acid	98.5	HMDB0000148	Organic acids and derivatives	Carboxylic acids and derivatives	Amino acids, peptides, and analogues	0.0641584	0.0666949	0.0670888	0.0670398	0.0668284	0.0791822	0.0440212	0.070391	0.0319399	0.0455429	0.0169836	0.0680588	0.0880821	0.122279	0.11634	0.0682091	0.0662399	0.0873347	0.0632327	0.0401424	0.0372915	0.0330674	0.0324834	0.0655781	0.0773644	0.0661167	0.108455	0.0842013	0.0192393	0.0401601	0.0343243	0.0515993	0.0498166	0.0411047	0.0484166
341	15.937	218.1	L-phenylalanine	98	HMDB0000159	Organic acids and derivatives	Carboxylic acids and derivatives	Amino acids, peptides, and analogues	0.0335178	0.0352507	0.0351422	0.0351397	0.0349806	0.0420801	0.0313661	0.0379099	0.0269941	0.0294138	0.0295249	0.0438371	0.0318601	0.0617879	0.0479265	0.043834	0.0371974	0.0422271	0.0272393	0.0344491	0.0271436	0.0401882	0.0278827	0.0317734	0.0300373	0.0358775	0.0353477	0.0345144	0.0277583	0.0334202	0.024389	0.0266664	0.0284198	0.0309544	0.0319271
353	16.293	240.073	D-ribose	74.6	HMDB0000283	Organic oxygen compounds	Organooxygen compounds	Carbohydrates and carbohydrate conjugates	0.000108991	0.000106232	0.000106235	0.000100745	9.98134e-05	0.000145049	6.21819e-05	0.000123848	7.42797e-05	9.68799e-05	4.02268e-05	0.00020056	0.000146557	0.000187897	0.000245378	0.000157978	0.000163762	0.000181759	9.06183e-05	0.000174395	8.66264e-05	0.000101423	0.000100598	0.000115173	6.76867e-05	0.000117325	0.000102807	7.74788e-05	4.14281e-05	9.12518e-05	3.39777e-05	0.000115418	0.000115952	0.000104134	9.76827e-05
354	16.332	401.169	Isoheptadecanoic acid	66.7					0.000106864	0.000124307	0.000143846	0.000136027	0.000133749	0.000129812	0.000132703	0.000112856	0.000146854	0.000112793	0.000145831	0.000120897	0.000107415	0.000119307	0.000101103	0.000106827	0.000122756	0.00016626	0.000145811	0.000168707	0.000154815	0.000143357	0.000166149	0.000119018	0.000126047	0.000117323	0.000127506	9.95458e-05	0.000119398	0.000142543	0.000136101	0.00015051	0.000141877	0.000126726	0.00014013
355	16.354	257.137	Lauric acid	82.5	HMDB0000638	Lipids and lipid-like molecules	Fatty Acyls	Fatty acids and conjugates	0.000620352	0.000740228	0.000788661	0.000800505	0.000790554	0.000693822	0.000680755	0.000722952	0.000619564	0.000549557	0.000558157	0.000545623	0.000778166	0.000571243	0.0006915	0.000718612	0.000599035	0.000744117	0.000768094	0.000693843	0.000771123	0.00086818	0.000790537	0.000730148	0.000832223	0.000713573	0.000828467	0.00082176	0.000716093	0.000879778	0.000862649	0.000878972	0.000840404	0.000977791	0.000848274
356	16.366	158.1	N-acetylaspartic acid	81.8	HMDB0000812	Organic acids and derivatives	Carboxylic acids and derivatives	Amino acids, peptides, and analogues	0.00180539	0.00180737	0.000533614	0.0011376	0.00122363	0.00128392	0.000488939	0.000765908	0.000192496	0.00185808	0.00262442	0.000565859	0.00185604	0.00251845	0.000819601	0.00158809	0.00476831	0.0025127	0.00180222	0.00236062	0.000211924	0.000111298	0.00152405	0.000733269	0.0011563	0.000748864	0.000919378	0.00042694	0.00135252	0.000197853	0.000299511	0.000659697	0.000397883	0.000417949	0.000388298
363	16.489	345.2	Cyanuric acid	93	HMDB0041861	Organoheterocyclic compounds	Triazines	1,3,5-triazines	0.0406736	0.0463753	0.067224	0.0523368	0.0509531	0.0418913	0.0455692	0.0520701	0.0822759	0.0447024	0.0549277	0.0477296	0.0418826	0.0524916	0.0625852	0.0334666	0.0639025	0.0548639	0.081339	0.097053	0.0442484	0.0534939	0.0742446	0.0493291	0.0537305	0.0624209	0.0716589	0.0317504	0.0678069	0.052564	0.0411729	0.066901	0.0455854	0.0364527	0.054092
365	16.503	326.1	Taurine	98.9	HMDB0000251	Organic acids and derivatives	Organic sulfonic acids and derivatives	Organosulfonic acids and derivatives	0.0323935	0.0268662	0.0338246	0.0328299	0.0304534	0.0128905	0.0196212	0.013953	0.0358976	0.0237409	0.0202284	0.0354515	0.0340504	0.0237407	0.0294402	0.0170728	0.0140875	0.022071	0.0144066	0.0137178	0.0179598	0.0857032	0.0436073	0.0159638	0.0708866	0.0311448	0.0433266	0.0301055	0.0191813	0.0260742	0.0208115	0.0161225	0.0124731	0.00962964	0.011462
366	16.538	116.088	L-asparagine	96.5	HMDB0000168	Organic acids and derivatives	Carboxylic acids and derivatives	Amino acids, peptides, and analogues	0.0116308	0.0114674	0.0108791	0.0109366	0.0110137	0.0168117	0.0103496	0.0143265	0.0101397	0.010418	0.0121777	0.0127202	0.00945327	0.0179687	0.0117375	0.0117924	0.0112046	0.0146356	0.00808777	0.0096654	0.00878232	0.0113311	0.00968648	0.00871064	0.00984207	0.00855968	0.0108196	0.00843519	0.0076549	0.00722718	0.00623709	0.00632094	0.00736009	0.00738574	0.00735323
367	16.589	205.1	D-xylulose	89	HMDB0001644	Organic oxygen compounds	Organooxygen compounds	Carbohydrates and carbohydrate conjugates	0.00631282	0.0068453	0.00684926	0.0068425	0.00680288	0.00423641	0.00226027	0.00406392	0.00188418	0.00413779	0.000904297	0.0091399	0.0112591	0.00927152	0.0158883	0.00895602	0.00702462	0.0112356	0.00501886	0.00686075	0.00553521	0.00734073	0.00397766	0.0075274	0.00409824	0.010943	0.00379466	0.00798953	0.00162325	0.00659202	0.00443399	0.00719297	0.00804314	0.00683027	0.00670934
369	16.606	307.105	D-arabinose	95.6	HMDB0029942	Organic oxygen compounds	Organooxygen compounds	Carbohydrates and carbohydrate conjugates	0.00102731	0.0010744	0.00108509	0.00108113	0.00108093	0.000692111	0.000392167	0.000660256	0.000318815	0.000546473	0.000207838	0.00125784	0.00152741	0.00143541	0.00219081	0.00124333	0.000877525	0.00123218	0.00101556	0.000941841	0.000841443	0.000952741	0.0006277	0.000981418	0.000715708	0.00112255	0.000644076	0.00126118	0.000422329	0.000939253	0.000615816	0.0013433	0.00100292	0.00129798	0.00121171
372	16.726	243.1	Digalacturonic acid	86.2	HMDB0039721	Organic oxygen compounds	Organooxygen compounds	Carbohydrates and carbohydrate conjugates	0.000574009	0.000574416	0.000561009	0.000525422	0.00053335	0.000514527	0.000188867	0.000317567	0.000392658	0.000345086	0.000500784	0.000475087	0.000489091	0.000580006	0.000668964	0.00035792	0.000557432	0.000405195	0.000425399	0.00034244	0.00035992	0.000432435	0.000312879	0.000333122	0.000484854	0.000331132	0.000537011	0.000260706	0.000256529	0.000359591	0.000244268	0.000339517	0.000215972	0.000263892	0.000290265
374	16.788	306.108	L-threo-2-pentulose	87.6	HMDB0000751	Organic oxygen compounds	Organooxygen compounds	Carbohydrates and carbohydrate conjugates	0.000166794	0.000176513	0.000175995	0.000180143	0.000177686	0.000144037	0.000175393	0.000179645	6.98579e-05	0.000273249	0.000117594	0.000406694	0.000393328	0.000363905	0.000859254	0.000328191	0.000535257	0.000506797	0.000225762	0.000251361	0.000179497	0.000253292	0.000145142	0.000264069	0.000157902	0.000396024	0.00017247	0.000212336	5.48513e-05	0.000327692	0.000186026	0.000426511	0.0002499	0.000324381	0.000209604
383	17	217.1	L-arabitol	99.2	HMDB0001851	Organic oxygen compounds	Organooxygen compounds	Carbohydrates and carbohydrate conjugates	0.00417202	0.00434996	0.00439005	0.00438528	0.00435906	0.00572251	0.00188893	0.00538061	0.00341581	0.00365035	0.00225499	0.00699544	0.00720058	0.00751866	0.00392018	0.00350233	0.00699314	0.00672244	0.0051391	0.00207288	0.00201327	0.00204046	0.00166428	0.00379594	0.006093	0.00525226	0.00405044	0.00274807	0.00211352	0.0032781	0.00213228	0.00354003	0.00509556	0.00122644	0.00279496
386	17.065	218.1	Dl-dopa	82.7	HMDB0000609	Organic acids and derivatives	Carboxylic acids and derivatives	Amino acids, peptides, and analogues	0.000417075	0.000407084	0.000391818	0.000415364	0.000406776	0.000552519	0.000466566	0.000496373	0.000417392	0.000261336	0.00054422	0.000240924	0.000158515	0.000677739	0.000248956	0.00025379	0.000408502	0.00024055	0.000330677	0.000508605	0.000580158	0.000370791	0.000556485	0.000186258	0.000525881	0.000230784	0.000396814	8.2474e-05	0.00029723	0.000379144	0.000127602	0.00025004	0.000127393	0.00017001	0.000178293
389	17.161	337.1	Guanine	73.7	HMDB0000132	Organoheterocyclic compounds	Imidazopyrimidines	Purines and purine derivatives	0.00245689	0.00233102	0.00233089	0.00233888	0.00234264	0.0091846	0.0143095	0.00973685	0.0111553	0.0148735	0.0113519	0.00801698	0.00851426	0.00950851	0.00574955	0.00479339	0.00510391	0.0119652	0.0128363	0.0100341	0.0100518	0.00605645	0.00780798	0.00327353	0.00405405	0.0036346	0.0026624	0.00772492	0.00955826	0.00625683	0.00469189	0.00515604	0.00326957	0.00355072	0.00247199
390	17.202	260.115	Aminoadipic acid	93.1	HMDB0000510	Organic acids and derivatives	Carboxylic acids and derivatives	Amino acids, peptides, and analogues	0.000695792	0.000694479	0.000680897	0.000702109	0.000707145	0.000986918	0.000600801	0.000811665	0.000645353	0.000646808	0.000710588	0.00103928	0.000568756	0.0010161	0.000508752	0.000460876	0.000724547	0.000207835	0.000804939	0.000434922	0.000766173	0.000610542	0.000415433	0.000847424	0.00120695	0.000568408	0.000809032	0.000665859	0.000435053	0.000569089	0.000357633	0.000488851	0.000240742	0.000423715	0.000292558
392	17.286	243.005	Beta-glycerophosphoric acid	98.6	HMDB0002520	Lipids and lipid-like molecules	Glycerophospholipids	Glycerophosphates	0.00446741	0.00458872	0.00338229	0.00398654	0.0040563	0.00489571	0.00549009	0.00449301	0.00401594	0.00434227	0.00483825	0.00466438	0.00454092	0.0039449	0.0040369	0.00439745	0.00496428	0.00407292	0.00365087	0.00377736	0.00366683	0.00443664	0.00393003	0.00449342	0.00461056	0.0041972	0.00470631	0.00272777	0.0037597	0.00384168	0.00342122	0.00331923	0.00334398	0.00346374	0.00366501
396	17.491	174.1	Putrescine	92.9	HMDB0001414	Organic nitrogen compounds	Organonitrogen compounds	Amines	0.0206122	0.0215077	0.0218601	0.0220598	0.0218808	0.031028	0.0278018	0.0290223	0.0220269	0.0163843	0.0258405	0.0304721	0.0233178	0.0169003	0.0218317	0.0289151	0.026945	0.013754	0.0158857	0.0177933	0.0213116	0.0138303	0.0177917	0.0263921	0.0289364	0.0211844	0.0336486	0.0216639	0.0174472	0.0188141	0.00051947	0.0180087	0.000533902	0.016792	0.0227575
397	17.512	130.1	Spermidine	72.3	HMDB0001257	Organic nitrogen compounds	Organonitrogen compounds	Amines	0.0292496	0.0317142	0.0323716	0.032585	0.0323168	0.0309347	0.0318949	0.027141	0.0291614	0.027729	0.0292513	0.0269697	0.0314729	0.0326788	0.024997	0.0278231	0.0294708	0.0367498	0.0340895	0.0347155	0.0370063	0.0326252	0.0382789	0.0245372	0.0316363	0.0297631	0.0299094	0.0257631	0.0286368	0.0282092	0.0268112	0.0323855	0.0314373	0.0276877	0.0335759
398	17.513	147.056	N-acetyl-d-mannosamine	79.4	HMDB0001129	Organic oxygen compounds	Organooxygen compounds	Carbohydrates and carbohydrate conjugates	0.0700232	0.0753747	0.0773725	0.0775187	0.076813	0.0726575	0.0749089	0.0644855	0.0684903	0.0653795	0.0684063	0.0632981	0.0743655	0.0771085	0.0594681	0.0664036	0.0687598	0.0875008	0.0801852	0.0819575	0.0878462	0.0791981	0.0901109	0.0577725	0.0763601	0.0705668	0.0709852	0.0604926	0.0681991	0.0682286	0.0645269	0.0751095	0.0757024	0.0676872	0.0810339
400	17.537	103.002	N-acetyl-5-hydroxytryptamine	75.8	HMDB0001238	Organoheterocyclic compounds	Indoles and derivatives	Hydroxyindoles	0.0331102	0.0433842	0.0501827	0.0487288	0.0472136	0.0319118	0.0271908	0.0222432	0.0296342	0.0309819	0.0303726	0.0288652	0.0272124	0.0299806	0.0253757	0.0253178	0.0357641	0.0496027	0.0458979	0.0481931	0.0431482	0.0404997	0.0409792	0.0284958	0.0336396	0.0313807	0.0362792	0.0258569	0.0368105	0.0376019	0.0358526	0.042096	0.0385073	0.0342797	0.0423121
408	17.787	357.1	Glycerol 3-phosphate	96	HMDB0000126	Lipids and lipid-like molecules	Glycerophospholipids	Glycerophosphates	0.0663702	0.0744651	0.0634223	0.0676711	0.0679914	0.0898983	0.0820871	0.0750921	0.0510332	0.0604523	0.0729175	0.0586041	0.057759	0.101162	0.0659661	0.0579221	0.0626861	0.0711165	0.0807922	0.0652898	0.0609889	0.0599533	0.0666481	0.0592477	0.0803709	0.0628653	0.0704415	0.0455924	0.0529652	0.0696458	0.0485235	0.0563684	0.0543125	0.0600974	0.0593281
410	17.872	217.1	Glucose-1-phosphate	90.8	HMDB0001586	Organic oxygen compounds	Organooxygen compounds	Carbohydrates and carbohydrate conjugates	0.0156557	0.0154216	0.0162714	0.0160429	0.0160419	0.00203839	0.00349185	0.00206612	0.00370498	0.0122377	0.00661145	0.00223603	0.0236807	0.00430012	0.0159994	0.0178696	0.0125524	0.00461821	0.0718307	0.0224849	0.0322847	0.0194536	0.0183407	0.00486288	0.0154209	0.00695248	0.00224669	0.0209509	0.00991765	0.0212148	0.0243706	0.0400037	0.00553765	0.034912	0.0341888
412	17.899	271.156	Cellobiose	77.3	HMDB0000055	Organic oxygen compounds	Organooxygen compounds	Carbohydrates and carbohydrate conjugates	0.000822721	0.00101565	0.00117711	0.00101663	0.00102609	0.000863681	0.00121087	0.000959648	0.000682539	0.00085887	0.000734783	0.000947316	0.000807376	0.000735576	0.000754342	0.0008614	0.000901938	0.000698415	0.00101084	0.000869977	0.00100049	0.000876856	0.000749901	0.00101647	0.00109241	0.000693307	0.00112829	0.00069834	0.000909823	0.000973822	0.00113125	0.00119732	0.000844128	0.00109261	0.000891033
413	17.931	292.1	Ribonic acid	84.6	HMDB0000867	Organic oxygen compounds	Organooxygen compounds	Carbohydrates and carbohydrate conjugates	0.00240104	0.00281425	0.0028225	0.00270226	0.00271873	0.00301165	0.000284088	0.00300182	0.00236967	0.00267957	0.00310955	0.00239028	0.0028386	0.00252459	0.00289659	0.00206589	0.00308453	0.00226467	0.00218327	0.00250839	0.00457846	0.00323577	0.00172813	0.00227046	0.00334904	0.00282143	0.00319558	0.00257805	0.00248243	0.0031298	0.00268158	0.00238292	0.00221168	0.0029379	0.00237172
414	17.984	156.1	L-glutamine	99.2	HMDB0000641	Organic acids and derivatives	Carboxylic acids and derivatives	Amino acids, peptides, and analogues	0.334894	0.344704	0.314655	0.31867	0.322004	0.265272	0.162015	0.18436	0.265928	0.152003	0.292895	0.267392	0.253936	0.384894	0.359963	0.152664	0.359469	0.25018	0.170547	0.174253	0.251223	0.267522	0.17945	0.178168	0.480282	0.178852	0.480611	0.157385	0.139298	0.15613	0.147577	0.158774	0.0849616	0.108971	0.138408
417	18.074	174.1	O-phosphoethanolamine	97.4	HMDB0000224	Organic acids and derivatives	Organic phosphoric acids and derivatives	Phosphate esters	0.026667	0.0336321	0.0359314	0.0361506	0.0354143	0.0270717	0.0224488	0.0184523	0.0161982	0.0191051	0.0241053	0.0300853	0.0289787	0.0257324	0.0340754	0.0243895	0.0270001	0.029988	0.0243366	0.0268205	0.0221811	0.0250702	0.020839	0.0275923	0.0376422	0.0277709	0.0444383	0.032043	0.021813	0.0292227	0.0221	0.027971	0.0201828	0.0278303	0.031019
420	18.123	419.197	Trimethoprim	73.1	HMDB0014583	Benzenoids	Phenol ethers	Anisoles	0.073813	0.0702117	0.061719	0.0605991	0.0618541	0.0791458	0.0158139	0.0357157	0.076621	0.0740728	0.0950843	0.101648	0.0845363	0.115128	0.0717775	0.0559242	0.141605	0.107677	0.070022	0.0829868	0.0724525	0.0578706	0.0715242	0.0384457	0.0619609	0.0528628	0.0808285	0.0266692	0.0539976	0.043706	0.0314424	0.0496505	0.0296988	0.0249823	0.0380948
424	18.326	217.1	D-fructose	92.9	HMDB0000660	Organic oxygen compounds	Organooxygen compounds	Carbohydrates and carbohydrate conjugates	0.0513682	0.0530557	0.0531952	0.0533961	0.0531653	0.00763765	0.0241421	0.0072256	0.0109456	0.0682786	0.00584602	0.0273401	0.145137	0.0205901	0.109225	0.0717004	0.0845879	0.0337509	0.242798	0.073251	0.0880534	0.0737475	0.0563092	0.0287315	0.0464641	0.0317084	0.0132332	0.0678438	0.0198506	0.0725772	0.0934167	0.178031	0.0277183	0.18404	0.163424
426	18.385	357.075	3-phosphoglyceric acid	92.3	HMDB0000807	Organic oxygen compounds	Organooxygen compounds	Carbohydrates and carbohydrate conjugates	0.000861507	0.00112415	0.00117881	0.00107149	0.00108	0.000439023	0.00663993	0.000513653	0.000429769	0.00134659	0.000404243	0.000438042	0.000699848	0.000280696	0.000598413	0.000582764	0.000435968	0.000526474	0.00210732	0.000720303	0.000956918	0.000626197	0.000439497	0.0006184	0.00118941	0.000644449	0.00040994	0.000490797	0.000664305	0.000884905	0.000747984	0.000544893	0.000498345	0.000625516	0.000602273
427	18.433	265.1	Hypoxanthine	99.9	HMDB0000157	Organoheterocyclic compounds	Imidazopyrimidines	Purines and purine derivatives	0.444983	0.476529	0.477887	0.482498	0.477932	0.40793	0.240314	0.352307	0.209507	0.284102	0.156246	0.761508	0.524081	0.598434	0.695511	0.493882	0.345889	0.611501	0.297275	0.349662	0.32028	0.44418	0.295601	0.602906	0.57993	0.628488	0.678366	0.411557	0.293619	0.415394	0.353464	0.435046	0.366576	0.436397	0.476534
429	18.484	204.1	L-sorbose	92.6	HMDB0001266	Organic oxygen compounds	Organooxygen compounds	Carbohydrates and carbohydrate conjugates	0.0219693	0.0218854	0.022301	0.0224254	0.0223963	0.00301125	0.00792388	0.00310501	0.00287576	0.0206555	0.00176499	0.0117187	0.0638082	0.00831281	0.0333212	0.0275643	0.0268031	0.0123777	0.0891819	0.0312105	0.0419291	0.0365002	0.0234993	0.0117413	0.0167253	0.0111784	0.00559859	0.026553	0.00615666	0.019406	0.0474683	0.0432366	0.0121998	0.0550939	0.08066
430	18.536	142.1	Ornithine	95.7	HMDB0000214	Organic acids and derivatives	Carboxylic acids and derivatives	Amino acids, peptides, and analogues	0.0143066	0.0147065	0.0146422	0.0147918	0.0147517	0.0202429	0.0224995	0.0180353	0.0126228	0.0101972	0.0230401	0.0151456	0.00928623	0.0106798	0.0146543	0.0183498	0.0100963	0.0070445	0.00825711	0.011219	0.0129144	0.00757562	0.00877809	0.0083317	0.0225438	0.0107468	0.0219976	0.0151927	0.0092625	0.0116934	0.0061368	0.00943526	0.00806396	0.00848949	0.0095508
431	18.552	273.093	Citric acid	96.1	HMDB0000094	Organic acids and derivatives	Carboxylic acids and derivatives	Tricarboxylic acids and derivatives	0.00505714	0.00505151	0.005127	0.0052153	0.00518661	0.0108136	0.0058767	0.0101477	0.00457784	0.00449319	0.00524045	0.00577728	0.00216928	0.00368008	0.00296867	0.00252469	0.00634958	0.00749685	0.00280701	0.00273437	0.00352776	0.00390663	0.00498531	0.00285912	0.00508018	0.00522416	0.00610816	0.00382084	0.00238277	0.00326744	0.00394492	0.00288023	0.00496578	0.00352004	0.0039105
432	18.614	147.054	2-amino-3-(3,4-dimethoxyphenyl)-4h-benzo[g]chromen-4-one	75.8					0.0342303	0.0298179	0.028879	0.0308737	0.0309179	0.0572971	0.0787454	0.0634372	0.0765354	0.0732056	0.0788376	0.0717455	0.0704621	0.0813727	0.065371	0.0629669	0.0819525	0.104034	0.0863057	0.10259	0.0907841	0.0807956	0.0876005	0.0559802	0.0746129	0.0684148	0.0752704	0.0527533	0.07937	0.0780842	0.0640705	0.0872565	0.0706215	0.0663106	0.0791573
433	18.66	157.1	Citrulline	90.1	HMDB0000904	Organic acids and derivatives	Carboxylic acids and derivatives	Amino acids, peptides, and analogues	0.012671	0.0137295	0.0130303	0.0131049	0.0131024	0.0163136	0.00864283	0.0134868	0.00956099	0.0102005	0.0126716	0.0205012	0.013731	0.0264532	0.021423	0.0186918	0.013622	0.0152676	0.0119048	0.0180775	0.0109701	0.0122292	0.0107647	0.011053	0.019954	0.0152487	0.0124198	0.0127397	0.0137893	0.0187702	0.00816084	0.00922804	0.00976781	0.00989695	0.00998687
434	18.671	276.059	Nicotianamine	78.7					0.00058294	0.000599165	0.000598062	0.000579868	0.00057928	0.000680547	0.000481468	0.000526868	0.00167519	0.000524665	0.00146757	0.000769315	0.000875105	0.00091937	0.00126789	0.00095827	0.000618308	0.00113695	0.0021411	0.000696558	0.0021384	0.00081681	0.000664311	0.000562547	0.00171476	0.000532702	0.00179766	0.000458134	0.00159403	0.000645844	0.000498841	0.00073404	0.000742197	0.000815151	0.000736578
435	18.71	226.05	Udp-n-acetylglucosamine	88.4	HMDB0000290	Nucleosides, nucleotides, and analogues	Pyrimidine nucleotides	Pyrimidine nucleotide sugars	0.000645663	0.000596365	0.000753825	0.000648468	0.000660334	0.000262954	0.000998308	0.000328488	0.00100917	0.000574325	0.000872243	0.000269967	0.000848742	0.000378099	0.000234524	0.000563444	0.000833469	0.000268268	0.000889169	0.000570534	0.00065449	0.000838185	0.000506222	0.000508693	0.00114846	0.000467257	0.00124478	0.000579456	0.000805091	0.00096468	0.000591166	0.000942983	0.000300146	0.000480019	0.00052591
437	18.774	356.1	O-phosphoserine	86.4	HMDB0000272	Organic acids and derivatives	Carboxylic acids and derivatives	Amino acids, peptides, and analogues	0.00111704	0.00124408	0.00111564	0.00109005	0.00109993	0.000434309	0.00059534	0.00036421	0.000519656	0.000298435	0.000374836	0.000348481	0.000801775	0.000762603	0.000532161	0.000251728	0.00028093	0.000701763	0.000290092	0.000400992	0.000332859	0.00041529	0.000451292	0.000411535	0.000564188	0.000439266	0.000754661	0.000463399	0.000325024	0.000444382	0.000310149	0.00023954	0.00025864	0.00032343	0.000282742
438	18.801	174.1	Cadaverine	90.1	HMDB0002322	Organic nitrogen compounds	Organonitrogen compounds	Amines	0.0044208	0.00456998	0.00445868	0.00447917	0.00447812	0.00142046	0.00101343	0.00128065	0.000978952	0.000424798	0.000587286	0.00365034	0.000854243	0.0356516	0.00368932	0.00276705	0.001525	0.000624452	0.000329509	0.000792347	0.000521067	0.000876943	0.000606696	0.0076385	0.00480741	0.000972227	0.0126978	0.00109288	0.00497762	0.000734851	0.000450072	0.00060616	0.00113858	0.00143145	0.00106552
439	18.837	217.1	Ethyl beta-d-galactofuranoside	90.5					0.0117938	0.0127771	0.012569	0.0127965	0.012656	0.00777955	0.0157785	0.00694619	0.0113805	0.018908	0.0104103	0.0103313	0.0220916	0.00968305	0.0273824	0.0165512	0.0178992	0.0169133	0.0334408	0.013159	0.0177035	0.0119848	0.0159093	0.00801088	0.0138206	0.00903331	0.010692	0.0146012	0.0117866	0.0162242	0.0205072	0.033498	0.0109447	0.0283066	0.0224132
443	18.956	144.1	Norvaline	75.1	HMDB0013716	Organic acids and derivatives	Carboxylic acids and derivatives	Amino acids, peptides, and analogues	0.00623992	0.0062511	0.00655869	0.006316	0.00630807	0.00438222	0.00411507	0.00336042	0.00432428	0.00331321	0.00119045	0.00711341	0.00752834	0.0135626	0.0126444	0.00885315	0.00788099	0.0100534	0.00619149	0.0100617	0.00591119	0.00905001	0.00803248	0.00583129	0.00358534	0.00350517	0.00237145	0.00248608	0.00302485	0.00979874	0.00528373	0.00700447	0.00671369	0.0116281	0.0101745
444	19.02	117	Myristic acid	97.7	HMDB0000806	Lipids and lipid-like molecules	Fatty Acyls	Fatty acids and conjugates	0.0118258	0.0126609	0.0129122	0.0129253	0.0129163	0.00976318	0.0110811	0.0103751	0.0096103	0.00880874	0.00930513	0.00995638	0.00971893	0.00945278	0.010865	0.00987831	0.00978326	0.00899904	0.0110124	0.0100185	0.0106742	0.0124926	0.00964669	0.010089	0.0107911	0.00937	0.0117016	0.0101241	0.00922846	0.00953757	0.00958555	0.0105674	0.00930592	0.00991253	0.0108419
446	19.066	117.1	Quinic acid	78.9	HMDB0003072	Organic oxygen compounds	Organooxygen compounds	Alcohols and polyols	0.0118258	0.000262485	0.0130794	0.00768027	0.00662224	0.00980894	0.0001896	0.0103751	0.00976422	0.000271894	0.00930513	0.000401536	0.00971893	0.00962551	0.010865	0.000391519	0.00978326	0.000428598	0.000153067	0.00028536	0.0106742	0.000326358	0.000291765	0.000289781	0.0107911	0.000218003	0.0122703	0.0001605	0.00922846	0.000265138	0.00958555	0.010732	0.00930592	0.00991253	0.0108419
447	19.133	96.0455	3-methylhistidine	90.4	HMDB0000479	Organic acids and derivatives	Carboxylic acids and derivatives	Amino acids, peptides, and analogues	0.00410715	0.00478541	0.00457387	0.00472404	0.00457292	0.00329103	0.00185569	0.00222264	0.00223276	0.00286287	0.00415344	0.00329576	0.00332831	0.00567917	0.0033583	0.0038335	0.0058392	0.00566155	0.00349348	0.00657826	0.00619211	0.00559911	0.00585665	0.00336452	0.00742962	0.0033041	0.00480297	0.00236598	0.00306598	0.00424187	0.0040548	0.00420849	0.00618845	0.00468511	0.00345193
449	19.229	264.098	Adenine	87	HMDB0000034	Organoheterocyclic compounds	Imidazopyrimidines	Purines and purine derivatives	0.0137382	0.0151158	0.0152626	0.0153196	0.0151334	0.0194274	0.0182858	0.0181324	0.0157945	0.0173943	0.0159902	0.0162209	0.0144491	0.0153162	0.0118286	0.0140856	0.019286	0.0121077	0.0173234	0.0171174	0.0135505	0.0160826	0.0137252	0.0167762	0.0211558	0.0159201	0.0178612	0.00958681	0.0163872	0.0178293	0.0115858	0.0172281	0.0145354	0.0139643	0.0143573
450	19.32	103.003	D-tagatose	97.2	HMDB0003418	Organic oxygen compounds	Organooxygen compounds	Carbohydrates and carbohydrate conjugates	0.0565426	0.0572773	0.0573658	0.0577763	0.0575515	0.0092653	0.0171368	0.00876092	0.00695888	0.0573104	0.00388158	0.0201624	0.145468	0.0219829	0.0891877	0.0569448	0.0433559	0.0209581	0.141019	0.0543364	0.06257	0.0614978	0.0345153	0.030964	0.0439708	0.0322171	0.00982569	0.111222	0.0177472	0.0639155	0.0574758	0.135188	0.0318484	0.154829	0.13147
458	19.585	179.079	Galactinol	87.2	HMDB0005826	Organic oxygen compounds	Organooxygen compounds	Carbohydrates and carbohydrate conjugates	0.0122807	0.0123118	0.0109733	0.0124509	0.0124474	0.0123619	0.0360005	0.0228546	0.018363	0.0103423	0.013794	0.0144075	0.0103592	0.017683	0.0198555	0.0132957	0.00808066	0.0124991	0.00991679	0.013913	0.0152533	0.013061	0.00908419	0.0104749	0.010402	0.0179497	0.0151594	0.0128551	0.00937923	0.011939	0.0167354	0.0116571	0.0139026	0.0131404	0.020522
465	19.745	319.1	Glucose	97.5	HMDB0000122	Organic oxygen compounds	Organooxygen compounds	Carbohydrates and carbohydrate conjugates	0.159483	0.167586	0.168534	0.168478	0.16782	0.0979838	0.16057	0.0909417	0.11614	0.190015	0.108939	0.0895929	0.288693	0.116592	0.229053	0.168977	0.108595	0.130915	0.249934	0.132592	0.180227	0.137766	0.139703	0.0904252	0.162142	0.0978104	0.0756977	0.270092	0.154904	0.170227	0.184141	0.317139	0.175255	0.264196	0.251992
467	19.803	85.0926	2-monopalmitin	82.3	HMDB0011533	Lipids and lipid-like molecules	Glycerolipids	Monoradylglycerols	0.00909152	0.00919929	0.00939013	0.00933295	0.00930254	0.00880353	0.00841918	0.00851649	0.00931871	0.00847756	0.00881607	0.00927152	0.00870392	0.00829912	0.00871474	0.00858545	0.0092678	0.00911051	0.00844135	0.00853524	0.00838798	0.00786423	0.0081317	0.00864244	0.00855948	0.00863162	0.0087044	0.00885109	0.00852173	0.00837051	0.00917989	0.00907618	0.00955602	0.00775396	0.00803741
469	19.819	144.1	Alprenolol	79.3	HMDB0015004	Benzenoids	Phenol ethers		0.0148678	0.0155194	0.0151228	0.015217	0.0152296	0.0169453	0.00864102	0.0142117	0.00739124	0.0114412	0.00212554	0.0230632	0.0215523	0.0296494	0.0368111	0.0290599	0.0251971	0.0262019	0.0173207	0.0272556	0.014467	0.0306519	0.0202569	0.0166923	0.0137464	0.0120649	0.00818065	0.00795216	0.00672714	0.0212902	0.0143268	0.021019	0.0211014	0.0242679	0.0228233
471	19.864	174.1	L-lysine	95.2	HMDB0000182	Organic acids and derivatives	Carboxylic acids and derivatives	Amino acids, peptides, and analogues	0.272991	0.282194	0.271349	0.274194	0.274411	0.37579	0.203406	0.322064	0.247295	0.211877	0.270374	0.382778	0.215045	0.414974	0.348137	0.27671	0.274317	0.250479	0.167844	0.223567	0.214704	0.234104	0.181146	0.279515	0.539663	0.273239	0.280178	0.242925	0.215794	0.232264	0.152502	0.161706	0.223758	0.176076	0.135058
472	19.881	205.1	Sophorose	85.6					0.00782603	0.00814486	0.00833734	0.0084108	0.00835388	0.00386242	0.00661159	0.00401475	0.00573608	0.00721876	0.00312943	0.0151223	0.0100229	0.00637126	0.00735926	0.012617	0.00916834	0.0110812	0.00499952	0.00701448	0.00511011	0.0106451	0.0133387	0.0110121	0.00735177	0.00879838	0.0104131	0.00350798	0.00308738	0.00584749	0.00893474	0.00679072	0.013666	0.00629661	0.0200695
475	19.968	319.1	Sorbitol	90.4	HMDB0000247	Organic oxygen compounds	Organooxygen compounds	Carbohydrates and carbohydrate conjugates	0.0046473	0.00488292	0.00452673	0.00476595	0.00474618	0.00320462	0.00317844	0.00313177	0.00301999	0.00350975	0.00250609	0.00399019	0.00530576	0.00472144	0.00666747	0.00281903	0.00317641	0.0043139	0.00473745	0.00288281	0.00298101	0.00485707	0.00454133	0.0033329	0.00565544	0.00326098	0.00624592	0.00283085	0.00293617	0.00281355	0.00524061	0.00376161	0.00270431	0.00353411	0.00327721
478	20.056	218.1	L-tyrosine	92.4	HMDB0000158	Organic acids and derivatives	Carboxylic acids and derivatives	Amino acids, peptides, and analogues	0.27678	0.28274	0.275727	0.278846	0.278047	0.373328	0.214895	0.309116	0.280965	0.232363	0.251669	0.386174	0.266465	0.513041	0.514746	0.373695	0.279324	0.331192	0.194821	0.279759	0.239957	0.333685	0.209518	0.273891	0.231438	0.30444	0.342092	0.288794	0.202085	0.228007	0.211466	0.20949	0.232331	0.254464	0.263953
480	20.116	332.1	Ascorbic acid	97.5	HMDB0000044	Organoheterocyclic compounds	Dihydrofurans	Furanones	0.00496808	0.00516312	0.0052072	0.00518525	0.00519119	0.00541443	0.00776061	0.00525216	0.00801855	0.00301394	0.00622673	0.00299517	0.0042805	0.00425141	0.00804221	0.00338724	0.0131784	0.00566901	0.00578415	0.0180314	0.0105572	0.00304973	0.0167774	0.00198911	0.00490831	0.00956418	0.00381232	0.00483581	0.00197394	0.0109185	0.00226875	0.00781697	0.0010608	0.0037656	0.0076506
482	20.155	239.082	Catechin	70	HMDB0002780	Phenylpropanoids and polyketides	Flavonoids	Flavans	0.00871748	0.00855232	0.00863626	0.00873279	0.00867871	0.00880984	0.0170409	0.0090058	0.00748176	0.00730334	0.00713214	0.00628185	0.00785431	0.00860704	0.008443	0.0108728	0.0115791	0.0175787	0.00842126	0.00909358	0.0113282	0.0090121	0.0143748	0.00790646	0.0102398	0.00735344	0.00959857	0.00823357	0.00579229	0.0095174	0.0109395	0.00907053	0.0113126	0.0139794	0.0102926
484	20.197	299.156	Pentadecanoic acid	83.6	HMDB0000826	Lipids and lipid-like molecules	Fatty Acyls	Fatty acids and conjugates	0.00201289	0.00229351	0.00220716	0.00220779	0.00224435	0.00167527	0.00242199	0.00200264	0.00142216	0.00153769	0.00165133	0.00194955	0.00185559	0.00151375	0.00164368	0.00158599	0.00174713	0.00140639	0.00194701	0.0018247	0.00193246	0.00227764	0.00191654	0.00230496	0.00212369	0.00194065	0.00248615	0.002045	0.00177083	0.00204732	0.00188714	0.00200164	0.00196293	0.00230207	0.0019898
485	20.222	217.1	Melezitose	92.8	HMDB0011730	Organic oxygen compounds	Organooxygen compounds	Carbohydrates and carbohydrate conjugates	0.00933814	0.00977137	0.00951069	0.0096949	0.00963594	0.00541845	0.00864195	0.0052584	0.00669128	0.0106446	0.00599589	0.00501127	0.0162376	0.00666657	0.0134873	0.00961225	0.00618931	0.00763167	0.013311	0.0075673	0.00911003	0.00764962	0.00812303	0.0051519	0.00888964	0.00531686	0.00457107	0.0146162	0.00847512	0.00951438	0.0100438	0.0173145	0.00996266	0.0149133	0.0144286
486	20.269	373.136	13beta-ethyl-3-oximinogon-4-en-17-one	80.9					0.00670593	0.0067915	0.00704503	0.00699454	0.00695084	0.00787344	0.00914283	0.00725338	0.00752387	0.00996942	0.0082692	0.00705143	0.00842023	0.0096197	0.00629632	0.00657769	0.0105296	0.0112276	0.0095677	0.00958415	0.0092137	0.00821349	0.00958181	0.00516793	0.0072038	0.00681046	0.00747493	0.00552064	0.00630572	0.00731164	0.00567535	0.00857285	0.0060743	0.00630807	0.00711653
487	20.271	194	Chenodeoxycholic acid	73.2	HMDB0000518	Lipids and lipid-like molecules	Steroids and steroid derivatives	Bile acids, alcohols and derivatives	0.00212658	0.00221355	0.00244633	0.00237098	0.00229376	0.00230302	0.00153585	0.00142855	0.0015233	0.0016354	0.00183461	0.00211596	0.0021097	0.00261199	0.00270953	0.000325943	0.00290486	0.00361162	0.00256715	0.00295288	0.00314687	0.00208144	0.00247586	0.00210405	0.00224549	0.00232562	0.00237172	0.00166199	0.00176589	0.00225951	0.00254038	0.00250767	0.00255394	0.00251781	0.00295959
489	20.33	147.1	Maltitol	81.5	HMDB0002928	Lipids and lipid-like molecules	Fatty Acyls	Fatty acyl glycosides	0.0105993	0.00571675	0.00434487	0.00509452	0.00560835	0.00304699	0.00446748	0.00966843	0.0117641	0.0148726	0.00980832	0.00383672	0.00991022	0.0106029	0.00715501	0.00823741	0.00740538	0.0075437	0.00529534	0.00644962	0.00979317	0.00205204	0.00682422	0.140571	0.00692758	0.00528488	0.0187155	0.00326651	0.000712874	0.00635576	0.0121034	0.00199049	0.00877254	0.00449241	0.0035353
490	20.333	299.2	1-hexacosanol	85.1					0.00345174	0.00538202	0.00548456	0.00559179	0.00545328	0.00506131	0.00266893	0.00288309	0.003033	0.00289886	0.00289708	0.00392952	0.00420561	0.00419333	0.00459979	0.00419827	0.00526722	0.00534834	0.00552647	0.00604186	0.00502447	0.00688656	0.00547026	0.0053747	0.00564602	0.00518466	0.00598905	0.00498375	0.0045739	0.00569277	0.00625272	0.0068848	0.00689052	0.00626194	0.00673904
493	20.429	204.1	D-mannose	98.9	HMDB0000169	Organic oxygen compounds	Organooxygen compounds	Carbohydrates and carbohydrate conjugates	0.868483	0.884659	0.897876	0.895656	0.893191	0.548147	1.22257	0.520206	0.907996	1.66562	0.851651	0.779052	1.63762	0.728042	1.78776	1.13018	1.25052	1.19254	2.08863	1.01973	1.27234	0.924739	1.16994	0.54225	1.09832	0.611309	0.649583	1.12885	0.934762	1.41217	1.48806	2.34305	0.862158	1.83293	1.55468
494	20.434	217.1	Tocopherol acetate	85.5	HMDB0033685	Lipids and lipid-like molecules	Prenol lipids	Quinone and hydroquinone lipids	0.185009	0.000331147	0.192795	0.154404	0.14602	0.112873	0.262707	0.106431	0.187641	0.385212	0.176484	0.157333	0.384845	0.150734	0.423019	0.242517	0.265134	0.255344	0.527304	0.214138	0.275924	0.193002	0.251082	0.110095	0.234388	0.126207	0.130222	0.249348	0.196623	0.315097	0.331487	0.616499	0.183252	0.445049	0.35243
495	20.458	217	5-methoxytryptamine	90.2	HMDB0004095	Organoheterocyclic compounds	Indoles and derivatives	Tryptamines and derivatives	0.000146709	0.000331147	0.00021808	0.078738	0.055399	0.112882	0.262451	0.106431	0.187641	0.384906	0.176484	0.157347	0.384845	0.150796	0.423019	0.000161178	0.265134	0.255422	0.524744	0.214138	0.275693	0.193063	0.251125	0.000160612	0.234376	0.125974	0.130212	0.248838	0.195798	0.314857	0.331512	0.614759	0.183307	0.000319472	0.351377
497	20.51	158.1	Glycyl proline	83.5					0.00351766	0.00359814	0.00350149	0.00354927	0.00349349	0.0046028	0.00224959	0.00355653	0.00164467	0.00241748	0.000489784	0.00512817	0.00383225	0.00710244	0.00989781	0.00626175	0.00484835	0.00653523	0.00238204	0.00496118	0.00318413	0.00481609	0.0044695	0.00329397	0.00171217	0.00316527	0.00181977	0.00222991	0.00135579	0.00391106	0.00188475	0.00280789	0.00501263	0.0038068	0.00393833
499	20.558	413.05	5,7-dihydroxy-4'-methoxyisoflavone	65.8	HMDB0002338	Phenylpropanoids and polyketides	Isoflavonoids	O-methylated isoflavonoids	0.000269544	0.000286335	0.0003566	0.000308694	0.000301163	0.000211363	8.08886e-05	0.000190684	0.000125079	0.000135871	9.95943e-05	0.000397482	0.000320564	0.000358505	0.000377852	0.000243607	0.000226246	0.000368285	0.000208244	0.000243064	0.000210193	0.00025718	0.000227898	0.000340892	0.000354742	0.000362342	0.000377085	0.000282265	0.000204096	0.000307405	0.000222765	0.000343878	0.00022946	0.000325718	0.000339721
500	20.598	103.01	Pantothenic acid	98.6	HMDB0000210	Organic oxygen compounds	Organooxygen compounds	Alcohols and polyols	0.0183777	0.0184246	0.0186244	0.0187072	0.0186192	0.0212218	0.0426526	0.0214037	0.0251345	0.0255862	0.0144372	0.0219557	0.0119932	0.021711	0.0154852	0.0284391	0.0254101	0.0135744	0.0144016	0.0194271	0.0126706	0.00576716	0.0189637	0.0137457	0.0191726	0.0124157	0.0123894	0.0153491	0.0093903	0.00914283	0.00580664	0.00839337	0.0036592	0.00601104	0.011878
501	20.622	221.079	Glucosaminic acid	84.1					0.00510517	0.00692228	0.0085859	0.00851406	0.00817391	0.00555851	0.00400791	0.00381927	0.00343914	0.00426383	0.0037867	0.00664221	0.00570777	0.00473883	0.0054525	0.00530905	0.00531482	0.00638519	0.0066273	0.00634835	0.00646389	0.00615445	0.00632343	0.00514336	0.0055155	0.00525301	0.00568322	0.00561623	0.00568946	0.00666946	0.00661655	0.00728568	0.00695966	0.00718187	0.00792511
502	20.638	333.1	Gluconic acid	97.5	HMDB0000625	Organic oxygen compounds	Organooxygen compounds	Carbohydrates and carbohydrate conjugates	0.00619537	0.00613065	0.00631959	0.00636856	0.00634284	0.00329527	0.00386541	0.00327165	0.00317679	0.00579154	0.00150865	0.0136891	0.00870831	0.0045299	0.0121354	0.00731201	0.00649229	0.00570931	0.00926201	0.00499717	0.00628896	0.00521381	0.00517764	0.00382472	0.00431034	0.00387604	0.00278137	0.00481541	0.00292018	0.00423517	0.00568198	0.00779588	0.00506773	0.00725839	0.00888669
503	20.64	103	Lactobionic acid	78.1					0.0183777	0.000363297	0.0186244	0.00761843	0.00909214	0.0003523	0.000428541	0.0214037	0.000322404	0.0255862	0.0144372	0.0140746	0.000292317	0.000571421	0.0102511	0.000172327	0.0254101	0.00705107	0.00772837	0.0194271	0.00695274	0.00503136	0.000323323	0.000308226	0.0192751	0.0124324	0.0123894	0.015439	0.00944029	0.00396516	0.00433008	0.00625675	0.00406562	0.00531856	0.00891674
504	20.673	260.036	Isohexonic acid	84.7					0.000552105	0.000926905	0.00116099	0.00106601	0.00105351	0.00118988	0.000586694	0.000657491	0.000354239	0.00045916	0.00065044	0.000579206	0.000488456	0.000697686	0.000928113	0.000880365	0.000878713	0.00105813	0.001052	0.0012028	0.00178779	0.00113265	0.00112311	0.000692448	0.00103192	0.000914809	0.00100972	0.000693483	0.000993649	0.00135002	0.0011805	0.0015149	0.00134812	0.00161657	0.00173388
507	20.788	326.105	2-amino-7,10-dimethyldibenzo[b,f][1,4]oxazepin-11(10h)-one	66.5					0.00558137	0.00485641	0.00444611	0.00437103	0.00451007	0.0049004	0.00828271	0.00574584	0.00712345	0.0061432	0.00822887	0.00697235	0.00640846	0.00571942	0.00446292	0.00433489	0.00654774	0.00547798	0.00366085	0.00427077	0.00334352	0.00369229	0.00287328	0.00343698	0.00481984	0.00404988	0.00530254	0.00338126	0.00460922	0.00303614	0.00237168	0.00329484	0.00244451	0.00237778	0.00317877
512	20.872	243.08	Cytidine-5-monophosphate	86.3					0.0109538	0.010278	0.0069978	0.0093582	0.00947513	0.010558	0.0102472	0.0100353	0.00973066	0.00855158	0.0119488	0.00721688	0.00757882	0.00841412	0.00920756	0.00734761	0.00925037	0.00795876	0.00702369	0.00732365	0.00755193	0.0102927	0.00835022	0.00778067	0.00925265	0.00860509	0.00946065	0.00675615	0.00688725	0.00795442	0.00703334	0.00859648	0.0069835	0.00745669	0.00836934
514	20.916	204.1	Scyllo-inositol	97.4	HMDB0006088	Organic oxygen compounds	Organooxygen compounds	Alcohols and polyols	0.00918238	0.00935268	0.0102262	0.0102649	0.0101256	0.00620543	0.00848612	0.00546508	0.00662743	0.00844666	0.00636066	0.00690065	0.0126628	0.00766032	0.0118071	0.00909039	0.00617307	0.00761344	0.0115187	0.00835833	0.00993775	0.00788821	0.00823959	0.00687508	0.0110694	0.00741316	0.00745139	0.0133959	0.00752256	0.00959748	0.00976224	0.0157785	0.00979125	0.0144508	0.0129628
516	20.98	311.2	Palmitelaidic acid	99.1	HMDB0012328	Lipids and lipid-like molecules	Fatty Acyls	Fatty acids and conjugates	0.00648377	0.00690065	0.00734706	0.00727091	0.0072181	0.00225891	0.00256292	0.00198583	0.00166402	0.00122973	0.00217387	0.00618713	0.00288945	0.00525767	0.00673661	0.0053726	0.00454377	0.00360519	0.00262611	0.00494861	0.00368325	0.0194182	0.00308709	0.00271766	0.00335632	0.00378391	0.00593575	0.00404857	0.00303156	0.00244206	0.00358018	0.00339065	0.00166094	0.00270724	0.00482413
520	21.172	117	Palmitic acid	99.1	HMDB0000220	Lipids and lipid-like molecules	Fatty Acyls	Fatty acids and conjugates	0.262109	0.275049	0.284149	0.285086	0.286098	0.203123	0.217663	0.195281	0.195657	0.172693	0.204211	0.230436	0.201615	0.170144	0.216892	0.222838	0.20297	0.207114	0.205627	0.235282	0.217277	0.346997	0.187892	0.205468	0.204464	0.219742	0.264464	0.21031	0.203814	0.202383	0.18113	0.212085	0.182585	0.226526	0.260783
521	21.173	313.2	Barbital	80.9					0.195346	0.208091	0.219436	0.218045	0.218407	0.155818	0.155391	0.137682	0.1391	0.123826	0.150806	0.169364	0.148426	0.125547	0.161545	0.165588	0.153676	0.158451	0.156859	0.181666	0.16751	0.269254	0.14409	0.16071	0.153797	0.165356	0.198935	0.158774	0.154692	0.153241	0.13929	0.16348	0.141155	0.175794	0.200664
524	21.316	355.053	Epigallocatechin	75.5	HMDB0001871	Phenylpropanoids and polyketides	Flavonoids	Flavans	0.00270216	0.00342647	0.00461119	0.00507431	0.00473692	0.00121053	0.000534736	0.000787477	0.000697827	0.00113948	0.000828462	0.000830266	0.00175747	0.000909574	0.000641367	0.00143517	0.00104823	0.000734316	0.000717264	0.00115368	0.00100149	0.000797891	0.00077241	0.000466738	0.000704289	0.00067836	0.00109079	0.000839453	0.00119267	0.00089101	0.00115203	0.000985974	0.000683203	0.000750842	0.000917459
527	21.454	147	N-acetylgalactosamine	85.7	HMDB0000212	Organic oxygen compounds	Organooxygen compounds	Carbohydrates and carbohydrate conjugates	0.611345	0.000479905	0.0105474	0.250117	0.299341	0.541434	0.599485	0.0013927	0.439345	0.000910184	0.00125248	0.69851	0.618274	0.561221	0.001397	0.00375767	0.00106036	0.517453	0.00834647	0.455858	0.00317679	0.538463	0.00287772	0.685908	0.865623	0.615753	0.884542	0.604813	0.484373	0.00366206	0.00332115	0.529455	0.408224	0.605959	0.550835
532	21.624	217.1	D-ribose 5-phosphate	95.8	HMDB0001548	Organic oxygen compounds	Organooxygen compounds	Carbohydrates and carbohydrate conjugates	0.00802859	0.00828646	0.00845011	0.00837886	0.0083438	0.00600869	0.00833617	0.00585855	0.00606938	0.0073734	0.00599421	0.00621224	0.0113752	0.00959444	0.00785956	0.00718849	0.00895456	0.0042296	0.00970646	0.00911891	0.0108316	0.00810582	0.00824775	0.0055044	0.00827981	0.007916	0.00454507	0.00353188	0.00619354	0.00829328	0.00455148	0.00872262	0.00719506	0.00278403	0.00709415
533	21.67	311.169	Uric acid	82	HMDB0000289	Organoheterocyclic compounds	Imidazopyrimidines	Purines and purine derivatives	0.000551203	0.000541568	0.000712418	0.000664402	0.000646826	0.000680132	0.000430679	0.000471967	0.000492192	0.000378822	0.000501675	0.000596552	0.000507065	0.000651349	0.000653316	0.000628364	0.000614332	0.000756223	0.000739183	0.00078286	0.000737505	0.000739971	0.000789291	0.000590959	0.000626808	0.000781176	0.000840126	0.000630247	0.000600624	0.000796458	0.000681199	0.000844616	0.00086197	0.0007714	0.000837932
534	21.68	174.1	2-aminoethyl methacrylate	90.7					0.0126719	0.0129272	0.0126531	0.0127965	0.0128223	0.0241686	0.0338799	0.0239003	0.0272859	0.0142697	0.0207128	0.0284881	0.0106172	0.0104355	0.0332372	0.0188492	0.0123703	0.00861457	0.0108754	0.00931942	0.00868165	0.0090809	0.00877216	0.00847774	0.00943547	0.0100374	0.0144618	0.00744215	0.0100573	0.00644951	0.00370639	0.00815137	0.00453544	0.00672395	0.0125892
536	21.722	357.1	2,3-dihydrobutyraldehyde 1-phosphate	88					0.00459231	0.00501302	0.00524934	0.00506245	0.00506337	0.00517521	0.00376183	0.00504679	0.00312124	0.00327211	0.00252475	0.00494181	0.00525193	0.00524	0.00685238	0.00566405	0.0048891	0.00651194	0.00658538	0.00504025	0.00605008	0.00473296	0.00432136	0.00404396	0.00457133	0.00623731	0.00376951	0.00416959	0.0030569	0.00669421	0.00410775	0.00898876	0.00440671	0.00503416	0.00543926
537	21.741	97.1	Myristyl myristate	72					0.00584333	0.00573554	0.00589582	0.00584376	0.00587998	0.0054661	0.00554126	0.00560034	0.00579894	0.00524618	0.0055422	0.00584404	0.00529339	0.00514231	0.00540259	0.00549209	0.00555082	0.00536205	0.00564383	0.00544797	0.00528867	0.0056321	0.00531581	0.00631351	0.00580565	0.0058794	0.00627327	0.00544243	0.00617415	0.00562784	0.00600606	0.00567492	0.00578939	0.00539616	0.00561181
538	21.829	319.1	Altrose	89.5					0.00217325	0.00223949	0.00235836	0.00230401	0.00231384	0.000554844	0.000320942	0.000559964	0.000215504	0.00159993	0.000170836	0.00275905	0.00405489	0.00275526	0.00548678	0.00262616	0.00160512	0.00165262	0.00142517	0.00274007	0.00153173	0.00172646	0.000643039	0.00288762	0.00215497	0.00351509	0.00219634	0.00394723	0.000501327	0.00245125	0.00365469	0.00183866	0.00215259	0.00311666	0.00239535
540	21.873	319.103	N-acetyl-d-hexosamine	83.4					0.0032649	0.00319132	0.00343669	0.00334363	0.00334147	0.000836508	0.000529661	0.000812645	0.000446193	0.00221603	0.000286065	0.00376472	0.00599147	0.00389007	0.00760872	0.00364191	0.00207915	0.00235855	0.00215595	0.00384157	0.00214055	0.00258944	0.0010367	0.00416347	0.00306917	0.00503345	0.00328453	0.00588223	0.000605447	0.00385707	0.0053107	0.00255791	0.00302651	0.00432626	0.0030639
542	21.902	298.3	Deoxycholic acid	67.9	HMDB0000626	Lipids and lipid-like molecules	Steroids and steroid derivatives	Bile acids, alcohols and derivatives	0.214807	0.224898	0.230523	0.229281	0.227991	0.22849	0.212023	0.214775	0.21338	0.210729	0.219071	0.217183	0.214595	0.21597	0.216005	0.217481	0.221598	0.227689	0.229728	0.229112	0.228782	0.226243	0.232208	0.223588	0.223644	0.227286	0.220173	0.222396	0.226352	0.23061	0.229557	0.229047	0.228895	0.228744	0.232561
546	22.013	327.214	Heptadecanoic acid	89	HMDB0002259	Lipids and lipid-like molecules	Fatty Acyls	Fatty acids and conjugates	0.00162967	0.00180404	0.00185298	0.00195868	0.00193005	0.00191231	0.00181505	0.00151176	0.00165311	0.00140935	0.00160654	0.0015812	0.0012773	0.00151269	0.00149414	0.00133904	0.00138901	0.00145022	0.00162853	0.00160499	0.00140904	0.0022715	0.00165364	0.001718	0.00159021	0.0013768	0.00200119	0.00166024	0.00144631	0.00158597	0.00157895	0.00182244	0.00149163	0.00168918	0.00183421
547	22.024	272.068	Coniferin	73.2	HMDB0013682	Organic oxygen compounds	Organooxygen compounds	Carbohydrates and carbohydrate conjugates	0.000862288	0.000894122	0.000905167	0.000816631	0.000852181	0.000670792	0.00102318	0.000580847	0.000678863	0.000345087	0.000353639	0.000774479	0.00105545	0.000560829	0.000650295	0.000901041	0.000480707	0.000724765	0.000982137	0.000620557	0.00107929	0.000892576	0.000649268	0.000589963	0.000544456	0.000317849	0.000505945	0.000760381	0.000470123	0.000283835	0.00128901	0.000288279	0.000643532	0.000665883	0.00110191
549	22.106	327.272	Octadecanol	89.8	HMDB0002350	Lipids and lipid-like molecules	Fatty Acyls	Fatty alcohols	0.00147829	0.00160348	0.00177377	0.00178104	0.00174766	0.00158093	0.00133307	0.00122412	0.00148199	0.0011581	0.00126568	0.00145243	0.00123331	0.00152361	0.00127033	0.00120891	0.00146382	0.00174744	0.00184929	0.00172324	0.00157387	0.00183917	0.00176339	0.00167783	0.00168052	0.00148703	0.00199125	0.00148577	0.00145699	0.00154978	0.00159464	0.00181863	0.0015733	0.001481	0.00164487
558	22.341	315.085	D-ribulose 5-phosphate	88.2	HMDB0000618	Organic oxygen compounds	Organooxygen compounds	Carbohydrates and carbohydrate conjugates	0.00339871	0.00312393	0.00374256	0.00361338	0.00353371	0.00520358	0.00272675	0.00524294	0.00232319	0.00273099	0.00140458	0.00610174	0.00415291	0.00571199	0.00529389	0.00495086	0.00562757	0.00814413	0.00461971	0.00430682	0.00682206	0.00510409	0.00448917	0.00354556	0.0022141	0.00540595	0.00272909	0.00225146	0.00146697	0.00264578	0.00307178	0.00333116	0.00385046	0.00269559	0.00377832
559	22.355	177.07	Xanthurenic acid	70.9	HMDB0000881	Organoheterocyclic compounds	Quinolines and derivatives	Quinoline carboxylic acids	0.00295653	0.00279551	0.00324549	0.00289247	0.00288999	0.00308374	0.00435273	0.00348823	0.00474671	0.00399757	0.00462154	0.003925	0.00393557	0.00352283	0.00329898	0.00413003	0.00374305	0.00540989	0.0038349	0.00449169	0.0046086	0.00311149	0.00395953	0.00256562	0.00460303	0.00316676	0.0037002	0.00226513	0.0035474	0.0034015	0.00324232	0.00376034	0.00302586	0.00318041	0.00305661
560	22.402	200.096	Spermine	94.9	HMDB0001256	Organic nitrogen compounds	Organonitrogen compounds	Amines	0.00271471	0.00239049	0.00266171	0.00251317	0.00254684	0.000344519	0.00221934	0.000619615	0.00354573	0.000600535	0.00188646	0.00326053	0.000678529	0.00168216	0.000207169	0.00745926	0.00597842	0.00187092	0.00293117	0.00315985	0.000775682	0.00220086	0.000179376	0.00511024	0.00469476	0.00027338	0.000483148	0.00373497	0.00373877	0.00327265	0.0023982	0.00303708	0.00381214	0.00415642	0.00527317
562	22.428	259.083	1-methyladenosine	65.1	HMDB0003331	Nucleosides, nucleotides, and analogues	Purine nucleosides		0.00129885	0.00176496	0.00193397	0.00176688	0.00178743	0.00179277	0.00140936	0.00153811	0.00152623	0.00151369	0.00129759	0.00183712	0.00218815	0.00215755	0.00168009	0.00202452	0.00158911	0.00210829	0.0020458	0.00138285	0.00186419	0.00265749	0.00180491	0.00170901	0.00216867	0.0022664	0.00181337	0.00163427	0.00172393	0.00172611	0.000978743	0.00271804	0.000972607	0.00193344	0.00248892
564	22.463	147.046	Trehalose-6-phosphate	79	HMDB0001124	Organic oxygen compounds	Organooxygen compounds	Carbohydrates and carbohydrate conjugates	0.0831717	0.0872361	0.0878737	0.0897145	0.0891389	0.0915553	0.069296	0.0901002	0.0910153	0.0796253	0.109104	0.100722	0.0956048	0.0768577	0.0966032	0.0893289	0.102549	0.0934867	0.0941685	0.0900576	0.0857321	0.107982	0.0822892	0.0741773	0.0877201	0.0884838	0.0896233	0.083096	0.0981252	0.0954686	0.0831518	0.108659	0.0844692	0.0969675	0.115968
565	22.497	202.1	L-tryptophan	85.5	HMDB0000929	Organoheterocyclic compounds	Indoles and derivatives	Indolyl carboxylic acids and derivatives	0.0463718	0.1388	0.105908	0.116469	0.110732	0.186489	0.140276	0.169441	0.134782	0.120014	0.143202	0.129542	0.0453842	0.214252	0.16395	0.130796	0.159866	0.155901	0.0430044	0.150105	0.0488169	0.16019	0.0780399	0.122981	0.133645	0.149386	0.150117	0.0425079	0.124765	0.0480346	0.102705	0.0433726	0.110282	0.121173	0.131344
566	22.527	337.2	Linoleic acid	94.8	HMDB0000673	Lipids and lipid-like molecules	Fatty Acyls	Lineolic acids and derivatives	0.0675279	0.0735731	0.0734378	0.0742141	0.0739095	0.0579429	0.0547314	0.0526537	0.046627	0.0397815	0.0584922	0.0561193	0.0523116	0.0424525	0.0600289	0.0692328	0.0505258	0.0495576	0.0468581	0.0619212	0.0521066	0.107875	0.0401863	0.0323234	0.0367529	0.051992	0.0501743	0.0462774	0.0415231	0.0525931	0.0393943	0.0549244	0.036845	0.0531486	0.0716376
569	22.568	117	Oleic acid	99.4	HMDB0000207	Lipids and lipid-like molecules	Fatty Acyls	Fatty acids and conjugates	0.134182	0.141908	0.149449	0.147606	0.147866	0.0945468	0.105649	0.0856642	0.0805002	0.0667499	0.0996599	0.107305	0.0914272	0.0978156	0.123566	0.112188	0.102803	0.109759	0.0841336	0.110043	0.0920285	0.268379	0.0797376	0.0912307	0.0987078	0.106412	0.117972	0.103088	0.0933367	0.0930658	0.100403	0.113095	0.0806209	0.106609	0.142203
575	22.696	366.125	D-fructose-1,6-bisphosphate	81.8					0.00140422	0.0015008	0.0014758	0.00137694	0.00138643	0.00217295	0.00177957	0.00228403	0.00159534	0.00166047	0.000156261	0.00130291	0.00151506	0.000990993	0.00136607	0.00187928	0.00203664	0.00183951	0.00091097	0.0023165	0.00223233	0.00193764	0.00292581	0.00139566	0.00121647	0.00145498	0.00132556	0.000813153	0.00101861	0.00183897	0.00141703	0.00131673	0.0016583	0.0014134	0.00193042
576	22.701	188.097	D-fructose-6-phosphate	78.9	HMDB0000124	Organic oxygen compounds	Organooxygen compounds	Carbohydrates and carbohydrate conjugates	0.00613827	0.00785857	0.00866087	0.00869681	0.00845108	0.00948114	0.00867716	0.00724575	0.003843	0.00555258	0.00678987	0.00556322	0.00695584	0.0107549	0.00722982	0.00647327	0.0064696	0.0122678	0.00883315	0.00766809	0.00680758	0.00794292	0.00735162	0.00552687	0.00625261	0.00724796	0.00826926	0.00544945	0.00472518	0.00879366	0.00536302	0.00920634	0.0070297	0.00954845	0.00783013
579	22.74	445.1	Beta-d-fructose 6-phosphate	70.9	HMDB0003971	Organic oxygen compounds	Organooxygen compounds	Carbohydrates and carbohydrate conjugates	0.00182219	0.00118251	0.00140754	0.00191167	0.0019223	0.000471948	0.0079608	0.000500393	0.00437773	0.00197512	0.00507468	0.000352698	0.000680719	0.000344685	0.00113159	0.0015654	0.000914688	0.000287669	0.0031747	0.00141011	0.00123444	0.00127235	0.00118949	0.000752071	0.0105268	0.00049087	0.00113514	0.00024234	0.00921647	0.00225011	0.000944145	0.00162107	0.000272982	0.00212903	0.00215805
581	22.754	117	Stearic acid	97.2	HMDB0000827	Lipids and lipid-like molecules	Fatty Acyls	Fatty acids and conjugates	0.190179	0.199456	0.216544	0.212694	0.212079	0.157609	0.195425	0.149881	0.169767	0.151905	0.150911	0.186246	0.152691	0.161473	0.169277	0.157581	0.151392	0.169667	0.149519	0.154826	0.144013	0.235562	0.16217	0.170068	0.177077	0.170037	0.190615	0.155627	0.159586	0.163568	0.148913	0.166135	0.159074	0.178271	0.179997
585	22.869	117	Propyl alcohol	79.3	HMDB0000820	Organic oxygen compounds	Organooxygen compounds	Alcohols and polyols	0.00146791	0.000689035	0.00150341	0.00131058	0.00123732	0.000428166	0.00121624	0.00117849	0.000868395	0.000944245	0.00112667	0.0011242	0.000451064	0.00115547	0.00171482	0.00156721	0.00183271	0.00116132	0.00102577	0.00184592	0.00243676	0.00276593	0.00198405	0.00128989	0.00135201	0.00141696	0.0010041	0.000831651	0.000933337	0.0010519	0.00198111	0.00118465	0.00102492	0.00359287	0.000896303
592	23.017	387.1	D-fructose-1-phosphate	85.5	HMDB0000399	Organic oxygen compounds	Organooxygen compounds	Carbohydrates and carbohydrate conjugates	0.0129583	0.0130574	0.0155781	0.0140027	0.0141121	0.0048822	0.0517415	0.00473729	0.027739	0.0106041	0.0434384	0.00244952	0.00126034	0.000288698	0.000517811	0.000682223	0.0010841	0.00119616	0.0032951	0.00742986	0.00782809	0.00465543	0.00411873	0.00452993	0.0514897	0.00267835	0.00573741	0.000618302	0.0978135	0.0155825	0.00462484	0.00248823	0.0015748	0.000330816	0.0015797
598	23.193	387.1	Mannose 6-phosphate	98.6	HMDB0001078	Organic oxygen compounds	Organooxygen compounds	Carbohydrates and carbohydrate conjugates	0.354282	0.378321	0.39418	0.387817	0.385058	0.00835028	0.477251	0.00731379	0.0609993	0.29195	0.152125	0.0291355	0.560554	0.0618627	0.374999	0.389575	0.238256	0.0594514	1.45216	0.49835	0.760003	0.413783	0.353207	0.0665225	0.306232	0.143521	0.0207796	0.544186	0.244854	0.51656	0.403829	1.16925	0.0716186	0.95821	0.826258
602	23.311	217.1	Pseudo uridine	82.8					0.0122211	0.0135585	0.0138607	0.0135945	0.0135466	0.00461947	0.0144984	0.00415245	0.00455791	0.0102767	0.00625608	0.00527794	0.019074	0.00630942	0.0138502	0.0153065	0.00924104	0.00571416	0.0445401	0.0152048	0.0208836	0.0131376	0.0109798	0.00523765	0.0100392	0.00760391	0.00401588	0.017084	0.00753255	0.0159126	0.0126268	0.0346476	0.00389304	0.0277971	0.023866
604	23.338	174.1	Altro-2-heptulose-7-phosphate	79.1					0.00940764	0.010281	0.00911806	0.00964104	0.00967432	0.0206403	0.0297421	0.0201731	0.0164504	0.00911577	0.0210489	0.0154213	0.00812077	0.00485715	0.0208361	0.0155341	0.0163348	0.012156	0.0186376	0.00662905	0.00646437	0.00847689	0.00755295	0.00475194	0.00878792	0.00873122	0.00888634	0.00304826	0.00789752	0.00753335	0.0039156	0.00776442	0.00634335	0.00743893	0.0100105
614	23.588	299.037	Glucose 6-phosphate	98	HMDB0001401	Organic oxygen compounds	Organooxygen compounds	Carbohydrates and carbohydrate conjugates	0.081621	0.0877433	0.0801653	0.088826	0.0873452	0.00354485	0.17076	0.00355824	0.0185605	0.127042	0.0477401	0.00641165	0.14156	0.0137517	0.135896	0.0999093	0.118824	0.0214179	0.616776	0.148625	0.212183	0.109463	0.108238	0.0156406	0.10069	0.0357313	0.00677359	0.0952127	0.0614061	0.199329	0.126969	0.478354	0.016926	0.324246	0.219841
615	23.598	91.04	Arachidonic acid	97.7	HMDB0001043	Lipids and lipid-like molecules	Fatty Acyls	Fatty acids and conjugates	0.0317106	0.0325093	0.0354799	0.0343527	0.0343746	0.0271021	0.0355773	0.0257323	0.0272218	0.0345594	0.0261362	0.0271158	0.0416839	0.0297776	0.0366524	0.0343143	0.0271578	0.0297868	0.0192631	0.0209545	0.0222179	0.0295228	0.024123	0.0245021	0.0248059	0.0424435	0.0265494	0.0338346	0.0225829	0.0375598	0.0230265	0.0251989	0.025508	0.0378126	0.0372534
623	23.79	221.094	D-myo-inositol 4-phosphate	84	HMDB0001313	Organic oxygen compounds	Organooxygen compounds	Alcohols and polyols	0.0102141	0.0131494	0.0174684	0.0162204	0.015726	0.0111983	0.00724087	0.00779319	0.00727995	0.00807245	0.00847361	0.0105273	0.0100423	0.00957455	0.00947315	0.0100438	0.0106475	0.012127	0.0113201	0.0127765	0.0124434	0.0124414	0.0126042	0.0101004	0.0111194	0.0104873	0.0123674	0.011619	0.0113601	0.0122505	0.0136547	0.013557	0.0145917	0.0128345	0.0157112
624	23.802	318.1	Myo-inositol phosphate	96.1					0.0553694	0.0608133	0.0520506	0.0581649	0.0583983	0.0666053	0.0544508	0.0553473	0.0548033	0.0517586	0.0589662	0.0561685	0.0601322	0.0647418	0.0614737	0.0609034	0.0676869	0.0644698	0.0588919	0.060443	0.0572417	0.0716999	0.0594153	0.057698	0.064329	0.0628609	0.0639193	0.0478671	0.0572917	0.0601774	0.0560231	0.060125	0.0598789	0.0545796	0.0611203
627	23.874	131.084	Oleamide	93.7	HMDB0002117	Lipids and lipid-like molecules	Fatty Acyls	Fatty amides	0.195725	0.206947	0.209009	0.208538	0.206853	0.207078	0.16571	0.181508	0.194474	0.190429	0.202556	0.190383	0.19137	0.190453	0.198492	0.19495	0.207729	0.199321	0.20614	0.19916	0.209433	0.20904	0.213725	0.184815	0.196019	0.209531	0.194206	0.184612	0.203767	0.19817	0.181705	0.207397	0.182726	0.187875	0.206335
628	23.877	338.2	Cis-gondoic acid	74.8	HMDB0002231	Lipids and lipid-like molecules	Fatty Acyls	Fatty acids and conjugates	0.0845629	0.0978162	0.0892795	0.088831	0.0930871	0.0893365	0.0651241	0.0764089	0.0818107	0.0816838	0.0866215	0.0856556	0.0937598	0.0787008	0.0850392	0.0806662	0.0894374	0.096925	0.0838458	0.095116	0.0979661	0.0988433	0.101877	0.0885933	0.0918999	0.103921	0.0812978	0.0893216	0.0969843	0.0945357	0.0917234	0.0970674	0.0900741	0.0899198	0.102287
631	24.018	217.1	Uridine	88.4	HMDB0000296	Nucleosides, nucleotides, and analogues	Pyrimidine nucleosides		0.0138417	0.0160005	0.0173456	0.0169801	0.0167821	0.0212851	0.0126707	0.0105367	0.00982148	0.015104	0.0108516	0.0213468	0.0220156	0.0188347	0.0205908	0.020098	0.0205035	0.0208693	0.0189284	0.0131001	0.0151511	0.0169927	0.013057	0.0158143	0.017534	0.0179756	0.0191299	0.0154628	0.0109017	0.0162001	0.0157838	0.0212342	0.0145545	0.0165083	0.0206503
641	24.231	205.1	1-o-hexadecylglycerol	97.2					0.00530821	0.00640384	0.00712714	0.00698007	0.00662549	0.00942106	0.00392294	0.00569933	0.00525984	0.00659075	0.00650572	0.0100387	0.00907069	0.00829631	0.0102227	0.00724599	0.0100797	0.00755766	0.00576037	0.00494448	0.00716054	0.0086368	0.00691747	0.00508331	0.00390275	0.00966991	0.00597517	0.00602233	0.00590366	0.0053089	0.00510287	0.00973069	0.00645101	0.00474284	0.00553153
644	24.28	225	Methylphosphonic acid	81.6					0.000235558	0.000222275	0.000122378	0.000356434	0.000375894	9.88256e-05	0.000317552	0.0973635	0.000384431	0.113136	0.000393662	0.000369665	0.123894	0.000408586	0.12063	0.000392304	0.147345	0.000333593	0.00213985	0.151339	0.000313298	0.000148184	0.000259856	0.0002858	0.000186908	0.00022138	0.000273683	0.000230716	0.000493411	0.114661	0.110672	0.114374	0.000258243	0.000388628	9.9545e-05
650	24.353	97.1	Homocystine	74.6	HMDB0000575	Organic acids and derivatives	Carboxylic acids and derivatives	Amino acids, peptides, and analogues	0.0227477	0.0238306	0.0227091	0.0229856	0.0230103	0.014248	0.0131725	0.0135388	0.0128496	0.0110996	0.0159221	0.0120955	0.0107946	0.0121994	0.0130869	0.0109379	0.0142363	0.0115476	0.0135631	0.0122166	0.0125061	0.0114097	0.0131069	0.0120184	0.0105606	0.0120626	0.0141072	0.0128563	0.0130506	0.011585	0.0117653	0.0120584	0.0127877	0.011359	0.0110929
651	24.411	174.1	3,4-dimethoxyphenylethylamine	85.5	HMDB0041806	Benzenoids	Benzene and substituted derivatives	Methoxybenzenes	0.0918865	0.108022	0.10948	0.106057	0.105549	0.279116	1.57118	0.192237	0.20848	0.11104	1.84007	0.158507	0.0679149	0.0710145	0.154923	0.118488	0.116111	0.0476851	0.133254	0.0765905	0.108715	0.0948905	0.097204	0.057	0.0734745	0.0891934	0.0628788	0.0474435	0.0934309	0.0573732	0.0267791	0.0974504	0.0371288	0.0480048	0.0977986
653	24.438	174.1	4-aminomethylcyclohexane carboxylic acid	82.3					0.571196	0.619129	0.544847	0.573151	0.576537	1.74435	1.57372	0.192237	1.54822	0.601328	1.84171	1.13192	0.268166	0.346441	0.573332	0.632076	0.49602	0.13064	0.680984	0.0765905	0.395104	0.251866	0.318861	0.364241	0.385311	0.572039	0.31694	0.378948	0.427825	0.316714	0.0268991	0.37646	0.0438312	0.0551938	0.0977986
654	24.451	174.1	Tyramine	95.3	HMDB0000306	Benzenoids	Benzene and substituted derivatives	Phenethylamines	0.526013	0.566578	0.544847	0.553604	0.553081	1.74435	1.57118	1.58448	1.45858	0.5415	1.84007	1.05942	0.268166	0.346441	0.457066	0.632076	0.49602	0.13064	0.681261	0.338296	0.395104	0.175671	0.245812	0.364241	0.385311	0.533514	0.31694	0.3642	0.378771	0.316714	0.104265	0.37646	0.147667	0.1585	0.327324
658	24.524	129.1	Beta-sitosterol	77.5	HMDB0000852	Lipids and lipid-like molecules	Steroids and steroid derivatives	Stigmastanes and derivatives	0.103711	0.10787	0.1088	0.107812	0.107446	0.106726	0.103186	0.103926	0.10196	0.103215	0.104619	0.105786	0.109817	0.105784	0.108325	0.105608	0.105604	0.111794	0.110599	0.109069	0.107976	0.107887	0.108609	0.107361	0.106905	0.108039	0.106479	0.109572	0.0010922	0.107417	0.10707	0.110271	0.10947	0.107796	0.109014
664	24.662	337.2	Warfarin	72.1	HMDB0001935	Phenylpropanoids and polyketides	Coumarins and derivatives	Hydroxycoumarins	4.39666	4.57316	4.48275	4.49324	4.48788	5.03318	4.37843	4.38764	4.92964	4.6748	5.16984	5.25214	4.8861	4.83504	4.87839	4.96753	5.66002	5.43736	5.0078	5.48352	5.36391	4.9059	5.31817	4.39311	4.3085	4.73091	4.85443	3.87222	4.74844	4.64413	4.66176	5.22797	4.92562	4.70613	5.11724
666	24.691	217.1	Inosine	86.2	HMDB0000195	Nucleosides, nucleotides, and analogues	Purine nucleosides		1.20212	1.21893	1.25454	1.23743	1.23555	1.36825	1.61494	1.43737	1.22777	1.33916	0.662622	1.62089	1.39536	1.46433	1.32304	1.23293	0.674927	1.04398	1.45951	0.833292	0.92207	1.60475	0.755831	1.48338	1.5835	1.53575	1.31384	0.862169	1.66373	1.29163	0.756761	1.62669	1.33473	1.10235	1.49026
668	24.742	91.03	Docosahexaenoic acid	73.6	HMDB0002183	Lipids and lipid-like molecules	Fatty Acyls	Fatty acids and conjugates	0.00696277	0.00807628	0.0079152	0.00774307	0.00789206	0.00918202	0.0159267	0.00915494	0.00820366	0.00807321	0.00813768	0.00664574	0.00716232	0.00619326	0.0106613	0.01219	0.00951989	0.00751776	0.00795691	0.010104	0.00696923	0.00803568	0.00913604	0.00723324	0.00566349	0.00865073	0.00774405	0.00609867	0.00675631	0.00774866	0.0070942	0.0096265	0.00621763	0.0076605	0.0177021
669	24.764	371.3	1-monopalmitin	88.8	HMDB0011564	Lipids and lipid-like molecules	Glycerolipids	Monoradylglycerols	0.0353822	0.0381466	0.0400031	0.0391807	0.0389054	0.0346685	0.033624	0.0309615	0.0388291	0.0322308	0.0357899	0.0354785	0.0320458	0.0299657	0.0329587	0.0323574	0.0348686	0.000176829	0.0331956	0.0354359	0.0325874	0.0363541	0.0328334	0.0951701	0.0299512	0.0346244	0.0345859	0.0312352	0.0331955	0.0305651	0.0443527	0.0365735	0.0310487	0.0311895	0.033196
670	24.793	409.196	1-monostearin	70.7	HMDB0011131	Lipids and lipid-like molecules	Glycerolipids	Monoradylglycerols	0.0142254	0.0158443	0.0155487	0.0159379	0.0158845	0.0211035	0.0293615	0.0194309	0.0225272	0.0213444	0.0170457	0.021643	0.0153081	0.0131863	0.0134426	0.0145639	0.0184503	0.0101591	0.0217313	0.0118344	0.017582	0.020943	0.0163507	0.0143184	0.00981985	0.022986	0.0154571	0.0114267	0.0255933	0.0132454	0.00966799	0.029772	0.0111943	0.00947121	0.0214791
673	24.905	479.2	Piceatannol	76	HMDB0004215	Phenylpropanoids and polyketides	Stilbenes		0.00769954	0.00720823	0.00612044	0.00687302	0.00684539	0.00756102	0.0064	0.00582346	0.00727982	0.00818484	0.00956467	0.00667786	0.00893104	0.00715962	0.00685529	0.00692302	0.0131312	0.0114465	0.0106079	0.0111745	0.010242	0.00634691	0.00886805	0.00412309	0.00558741	0.0060396	0.00615905	0.00269807	0.00591351	0.00588098	0.00487209	0.00745827	0.00560941	0.00619845	0.00866893
674	24.92	351.119	Urocanic acid	66.9	HMDB0000301	Organoheterocyclic compounds	Azoles	Imidazoles	0.119364	0.134087	0.139122	0.13785	0.13554	0.145764	0.11496	0.106901	0.127216	0.116588	0.129541	0.122341	0.123472	0.111502	0.100571	0.0962454	0.128218	0.0936834	0.143246	0.0938527	0.146647	0.151978	0.138184	0.0852482	0.0773208	0.147059	0.107688	0.0669008	0.135547	0.0879001	0.0666199	0.180385	0.0745057	0.0582693	0.128513
677	24.95	361.139	1-kestose	89.9	HMDB0011729	Organic oxygen compounds	Organooxygen compounds	Carbohydrates and carbohydrate conjugates	0.0130901	0.0142205	0.014548	0.0143908	0.0143058	0.0209132	0.0333339	0.0190008	0.00660393	0.0150032	0.0173073	0.00490403	0.00610002	0.00392417	0.00740707	0.00385629	0.00431246	0.000324605	0.00812765	0.0602686	0.075344	0.0370339	0.00564367	0.00717533	0.00441914	0.00267546	0.0211482	0.0258971	0.00783786	0.00776425	0.00381187	0.00556282	0.00266037	0.00212028	0.00368893
678	24.988	230.095	Adenosine	83.8	HMDB0000050	Nucleosides, nucleotides, and analogues	Purine nucleosides		0.00302037	0.00358745	0.00319488	0.00330809	0.00328031	0.00400246	0.0035149	0.00338038	0.00315163	0.00297684	0.00321412	0.00403178	0.00328914	0.00325462	0.00362407	0.00360186	0.00264373	0.00410729	0.00398741	0.00262627	0.00294828	0.00344884	0.00272256	0.00288343	0.00299224	0.003484	0.00426768	0.00176587	0.00333089	0.00339485	0.00218041	0.00383951	0.00300427	0.00368368	0.00349876
680	25.038	397.277	Behenic acid	86.1	HMDB0000944	Lipids and lipid-like molecules	Fatty Acyls	Fatty acids and conjugates	0.00127326	0.00145792	0.00250728	0.00188392	0.00184912	0.00155914	0.00105124	0.0011833	0.00108234	0.0011056	0.000795273	0.00130781	0.0014302	0.00121567	0.00126445	0.00127927	0.00124412	0.00212557	0.00208257	0.00180768	0.00170559	0.00218305	0.00192286	0.00165085	0.00178283	0.00174376	0.00191546	0.00276521	0.00220131	0.0018512	0.00186582	0.00190631	0.00186242	0.00188876	0.0018063
683	25.099	411.178	1-tetracosanol	61.8					0.00432256	0.00421968	0.0045221	0.00454206	0.00444277	0.00440709	0.00398993	0.00345342	0.00407629	0.00400734	0.00459097	0.00470331	0.00468315	0.00424095	0.00418749	0.00480743	0.00583295	0.00653792	0.00647708	0.00623071	0.00601215	0.00558228	0.00629344	0.00358312	0.00441496	0.00446975	0.00388819	0.00304618	0.00443959	0.00499758	0.00407531	0.00612677	0.00441712	0.00524511	0.00591374
684	25.12	204.1	Melibiose	96.8	HMDB0000048	Organic oxygen compounds	Organooxygen compounds	Carbohydrates and carbohydrate conjugates	0.00894769	0.00908013	0.00894007	0.00910043	0.00904739	0.0026222	0.0153682	0.00202131	0.00421101	0.00387559	0.00920134	0.00183525	0.0245324	0.00320895	0.00372167	0.0029989	0.00187768	0.00123019	0.0944754	0.00731701	0.0107247	0.00297678	0.00351736	0.0025942	0.0140887	0.00102935	0.00820195	0.00361172	0.00865498	0.00861968	0.0173643	0.0337695	0.00215439	0.0123471	0.024435
686	25.149	221.093	Xanthosine	81.8	HMDB0000299	Nucleosides, nucleotides, and analogues	Purine nucleosides		0.00796372	0.0106185	0.0136368	0.0132818	0.0127743	0.00878278	0.0051582	0.00559741	0.00526375	0.00649185	0.00622484	0.00813464	0.00919984	0.00714984	0.00679239	0.00785356	0.00782004	0.0106918	0.0113062	0.0110503	0.0104005	0.0111494	0.0107057	0.00789498	0.00885272	0.00897713	0.00907645	0.00824876	0.0102088	0.00962512	0.0110623	0.0128973	0.0114701	0.0122016	0.0134842
689	25.306	204.1	Alpha-lactose	95.4	HMDB0000186	Organic oxygen compounds	Organooxygen compounds	Carbohydrates and carbohydrate conjugates	0.0139108	0.0151969	0.015209	0.0150619	0.0150023	0.00145558	0.0262568	0.00159859	0.00540314	0.00668233	0.0151496	0.00188071	0.0455066	0.00105287	0.00405861	0.00372769	0.000955489	0.00160331	0.164204	0.00884024	0.015197	0.00516307	0.00525092	0.0028352	0.0228823	0.00119055	0.0128956	0.00345981	0.0152757	0.0128248	0.0287828	0.0617752	0.00101221	0.0193828	0.0413339
692	25.392	103	2-monoolein	91.8	HMDB0011537	Lipids and lipid-like molecules	Glycerolipids	Monoradylglycerols	0.046422	0.0480014	0.047921	0.0479463	0.0478497	0.0424569	0.0592544	0.0398872	0.0428826	0.0285842	0.0393389	0.060419	0.0435229	0.0163229	0.0810374	0.0564287	0.0463238	0.036845	0.0419495	0.0841213	0.0520599	0.0805565	0.0313646	0.0163643	0.0296827	0.0269414	0.021051	0.028971	0.0268354	0.029979	0.0384327	0.0651577	0.0220113	0.0469352	0.0928058
693	25.394	129.1	2-monostearin	73.9					0.0341407	0.0356557	0.035004	0.0366295	0.0368182	0.0312615	0.0422044	0.0291203	0.0310998	0.0204726	0.0293873	0.043849	0.031819	0.0142025	0.0587171	0.0412416	0.0339514	0.0271497	0.0315921	0.0626039	0.0395358	0.0605076	0.0228722	0.0127259	0.0223071	0.0195634	0.0155219	0.0210841	0.0206123	0.0229476	0.0285677	0.04805	0.0159986	0.0337681	0.0689555
694	25.439	361.141	Trisaccharide	93.2					0.01342	0.0147509	0.0147378	0.0147487	0.014608	0.00100061	0.0175236	0.000803878	0.00352325	0.0042124	0.0110746	0.00149411	0.03636	0.00216514	0.00242528	0.00241275	0.00156241	0.000630218	0.0924255	0.00650449	0.0103373	0.0042607	0.00341656	0.00325331	0.0181798	0.000815045	0.00964605	0.00394901	0.0134409	0.00871604	0.0180153	0.0387078	0.00106669	0.0143195	0.0308516
697	25.503	382.3	3'-adenylic acid	62	HMDB0003540	Nucleosides, nucleotides, and analogues	Ribonucleoside 3'-phosphates		0.337733	0.361656	0.365153	0.361137	0.359097	0.355976	0.319976	0.330211	0.329847	0.337926	0.341834	0.34273	0.347244	0.34759	0.000112232	0.347242	0.349998	0.359072	0.362137	0.35705	0.36051	0.363895	0.361944	0.354656	0.350659	0.35881	0.351044	0.000119606	0.358748	0.36378	0.363254	0.367823	0.359449	0.357871	0.359289
699	25.576	361.2	Maltotriose	92.9	HMDB0001262	Organic oxygen compounds	Organooxygen compounds	Carbohydrates and carbohydrate conjugates	0.0040787	0.00413849	0.00417679	0.00418015	0.00418374	0.000667793	0.00539861	0.000531209	0.00120479	0.0012466	0.00319712	0.000189711	0.0114866	0.000455954	0.00114835	0.000855934	0.000648668	0.000513058	0.025947	0.00152492	0.00274646	0.000988947	0.00118008	0.000194841	0.00504336	0.000481106	0.00223931	0.00163038	0.00375839	0.00273679	0.00602324	0.0113061	0.000509408	0.00508717	0.00894395
700	25.583	397.3	Monooleoylglycerol	91.3	HMDB0011567	Lipids and lipid-like molecules	Glycerolipids	Monoradylglycerols	0.00266883	0.00294677	0.00284942	0.00287492	0.00284807	0.00192077	0.00231787	0.00181596	0.00208832	0.00131862	0.00232058	0.00275598	0.00188022	0.00182223	0.00367979	0.00264819	0.00241536	0.00208581	0.00189471	0.00384343	0.00242453	0.00428265	0.00162345	0.001403	0.00188249	0.0019102	0.00163923	0.00177098	0.00203322	0.00159848	0.00178189	0.00266612	0.00121934	0.00162523	0.00367296
701	25.62	324.1	Guanosine	93.6	HMDB0000133	Nucleosides, nucleotides, and analogues	Purine nucleosides		0.0118303	0.0130662	0.0126134	0.0127104	0.0126884	0.0135257	0.00891659	0.0109983	0.00814763	0.011065	0.00488098	0.0211341	0.0177781	0.0180101	0.0153123	0.0167491	0.00961474	0.0161546	0.0129007	0.00908708	0.00841375	0.0134209	0.00755097	0.015588	0.0115243	0.0182636	0.0131107	0.00729859	0.00970844	0.0106532	0.00668405	0.0136882	0.0143611	0.0114266	0.0154198
702	25.696	399.3	Glycerol monostearate	98.4	HMDB0011535	Lipids and lipid-like molecules	Glycerolipids	Monoradylglycerols	0.0249291	0.0264121	0.0264136	0.0269292	0.0266712	0.0225511	0.0229841	0.0208587	0.025832	0.0206451	0.0241925	0.0233098	0.0211332	0.02075	0.0216955	0.0207083	0.0228122	0.0213091	0.0210254	0.0230657	0.0204129	0.0248262	0.0214334	0.0774714	0.0205914	0.0236882	0.0241638	0.0198244	0.0225893	0.0213301	0.033294	0.0243976	0.0212175	0.0204549	0.0214586
703	25.716	174.1	Glycyl tyrosine	83.9					0.0279116	0.0354983	0.0264076	0.027228	0.0280888	0.0330846	0.010676	0.0150046	0.0241246	0.0256792	0.0312597	0.0292425	0.0331391	0.0236402	0.0305116	0.0359893	0.038752	0.0345719	0.0400386	0.0308944	0.0319377	0.022612	0.0273002	0.0213736	0.0170448	0.0284867	0.0215601	0.0110572	0.0226644	0.0193743	0.0197296	0.0316233	0.0219495	0.0249527	0.0311176
704	25.743	398.34	Daidzein	73.2	HMDB0003312	Phenylpropanoids and polyketides	Isoflavonoids	Isoflav-2-enes	0.00202501	0.00243546	0.0021303	0.00225463	0.00223174	0.00156141	0.00111457	0.00130585	0.00245421	0.00190445	0.00163434	0.00180165	0.000862959	0.00101732	0.00408436	0.000967083	0.00215142	0.00221887	0.000840091	0.00124001	0.00188564	0.00484674	0.00100521	0.00136576	0.000839006	0.00141872	0.00121674	0.000679433	0.00145927	0.00165359	0.000874817	0.00127225	0.000738371	0.001118	0.00184963
705	25.785	236.092	5'-deoxy-5'-methylthioadenosine	80.6	HMDB0001173	Nucleosides, nucleotides, and analogues	5'-deoxyribonucleosides	5'-deoxy-5'-thionucleosides	0.00792002	0.00882967	0.00843596	0.00846211	0.00846713	0.0103037	0.0110404	0.009429	0.009163	0.00665097	0.00804034	0.0112341	0.0081656	0.00838375	0.00387843	0.00913396	0.0134227	0.00595921	0.0104793	0.0109623	0.0100528	0.0108112	0.00967712	0.0101919	0.00979744	0.00833744	0.0104489	0.00316474	0.00859946	0.00495209	0.00697275	0.00545754	0.00645844	0.00435037	0.00862901
706	25.914	375.108	3-hydroxy-(3beta,5alpha)-androstan-17-one	67.1					0.00310986	0.00321457	0.0024811	0.002803	0.00281577	0.00408409	0.0055187	0.00340916	0.00465567	0.00440578	0.00426923	0.00385522	0.00317382	0.00271287	0.0027893	0.00288971	0.00519054	0.00266627	0.0043555	0.00267678	0.00342131	0.00335221	0.00341488	0.00177863	0.00182898	0.00333318	0.00263277	0.00126804	0.00381455	0.00230959	0.00152449	0.00413897	0.00176196	0.00124171	0.00300354
709	25.951	95.0833	Squalene	89.4	HMDB0000256	Lipids and lipid-like molecules	Prenol lipids	Triterpenoids	0.00921994	0.00828553	0.00811151	0.00833721	0.0083398	0.00916934	0.00938278	0.00860064	0.0114759	0.00781986	0.00945546	0.00536225	0.00836364	0.00540951	0.00962551	0.00460701	0.00771681	0.00563964	0.00620588	0.00503202	0.00668993	0.00531868	0.00651586	0.00441804	0.00571018	0.00818466	0.00548292	0.00756009	0.00596799	0.00619316	0.00487509	0.0055974	0.00434747	0.00625039	0.00741561
710	26.009	486.154	Cerotinic acid	75.4	HMDB0002356	Lipids and lipid-like molecules	Fatty Acyls	Fatty acids and conjugates	0.000281986	0.000351452	0.000289983	0.000321816	0.000320273	0.000160999	0.000417889	0.000158119	0.00024795	0.000261281	0.000160939	0.000304727	0.0005275	0.000190034	0.000329264	0.000506265	0.000405149	0.000350696	0.000800985	0.000391877	0.000590815	0.000429409	0.000466591	0.000210605	0.000252167	0.000178081	0.000195277	0.000274862	0.00025656	0.000196485	0.000770622	0.000308272	0.000310591	0.000377245	0.000669725
711	26.031	425.339	Tetracosanoic acid	84.4	HMDB0002003	Lipids and lipid-like molecules	Fatty Acyls	Fatty acids and conjugates	0.00124327	0.00155302	0.00197508	0.00182988	0.0017779	0.00179193	0.00130944	0.00109963	0.00121325	0.00122658	0.00137223	0.00165519	0.00126233	0.00126666	0.00119835	0.00135815	0.00132329	0.00173813	0.00186232	0.00170602	0.00196112	0.00184969	0.00170898	0.00182708	0.0016977	0.00195753	0.0018529	0.00198696	0.00221043	0.00192313	0.00181767	0.00229793	0.00185882	0.00193988	0.00203355
714	26.243	243.016	Dodecanol	70	HMDB0011626	Lipids and lipid-like molecules	Fatty Acyls	Fatty alcohols	0.00279442	0.00283511	0.00261192	0.00324409	0.00319271	0.00291216	0.00324239	0.00345079	0.00331597	0.00211312	0.00355845	0.0039673	0.00393874	0.00329352	0.00496026	0.00428242	0.00412377	0.00361455	0.00285348	0.00428255	0.00274462	0.00351756	0.00331325	0.00239621	0.00326083	0.00313119	0.0032971	0.00224683	0.00204714	0.00262478	0.00350823	0.00377761	0.00263868	0.00309964	0.00589783
722	26.865	315.1	Inosine-5'-monophosphate	92	HMDB0000175	Nucleosides, nucleotides, and analogues	Purine nucleotides	Purine ribonucleotides	0.0952171	0.113506	0.0956795	0.117292	0.111928	0.152467	0.0401618	0.0974245	0.0999012	0.08207	0.163633	0.0436292	0.0606554	0.0869837	0.118139	0.0648848	0.174915	0.11636	0.109555	0.10716	0.163458	0.12746	0.146217	0.0337448	0.0626039	0.062856	0.065245	0.122374	0.052485	0.0945792	0.125371	0.124887	0.0622181	0.0691913	0.0990645
723	26.968	259.077	1-methylinosine	80.6	HMDB0002721	Nucleosides, nucleotides, and analogues	Purine nucleosides		0.00259366	0.00266329	0.00285362	0.00277497	0.00276277	0.00319381	0.00322779	0.00277055	0.00268197	0.00281708	0.00240532	0.00378422	0.00346653	0.00302329	0.00306077	0.00309258	0.00261602	0.00345497	0.00325076	0.00252433	0.00208174	0.00329144	0.00248276	0.0024826	0.00273614	0.00348367	0.00247754	0.00129499	0.00303946	0.00262417	0.00169577	0.00300432	0.00248956	0.0025357	0.00331961
725	27.021	488.389	Gamma-tocopherol	79.2	HMDB0001492	Lipids and lipid-like molecules	Prenol lipids	Quinone and hydroquinone lipids	0.00163957	0.00170171	0.00158613	0.00168488	0.00166886	0.00236037	0.00365799	0.00216283	0.00263651	0.00208044	0.002597	0.00422568	0.00303832	0.00361145	0.00257385	0.0025367	0.00313221	0.0038985	0.00161306	0.00160702	0.00191225	0.00472684	0.00226963	0.00154256	0.00209537	0.00326834	0.00231223	0.00291975	0.00247448	0.00262901	0.00190505	0.00223503	0.00136363	0.00184561	0.00316468
726	27.198	299.053	Phosphoglycolic acid	69.8	HMDB0000816	Organic acids and derivatives	Organic phosphoric acids and derivatives	Phosphate esters	0.00192958	0.00166968	0.00250823	0.00236917	0.00244132	0.00215196	0.00267383	0.0024741	0.00240969	0.00343618	0.00320528	0.000867432	0.00194484	0.00204666	0.0025378	0.00244848	0.00295513	0.00180942	0.00230522	0.00200976	0.00226947	0.00240205	0.00136704	0.0017429	0.00242298	0.00150005	0.00272075	0.00274671	0.00193312	0.00254495	0.00112562	0.00192583	0.000973554	0.0014578	0.00201411
729	27.38	315.1	5'-adenosine monophosphate	90.6	HMDB0000045	Nucleosides, nucleotides, and analogues	Purine nucleotides	Purine ribonucleotides	0.00944697	0.0115655	0.0121988	0.0121466	0.0118679	0.0160623	0.00603883	0.00997471	0.0113951	0.00902787	0.0182243	0.007114	0.00952269	0.0112691	0.0119635	0.00911363	0.0141779	0.0125949	0.0124826	0.00925965	0.0141539	0.011388	0.0118414	0.0052164	0.00751466	0.00926547	0.0095915	0.00657015	0.0092637	0.00869007	0.0079011	0.0130619	0.00722479	0.00790437	0.0127145
732	28.087	237.097	Alpha-tocopherol	87.6	HMDB0001893	Lipids and lipid-like molecules	Prenol lipids	Quinone and hydroquinone lipids	0.00198773	0.00221276	0.00210531	0.0021012	0.00209869	0.00404742	0.00502177	0.00376618	0.00368218	0.00396379	0.00362731	0.00619307	0.00699979	0.00592183	0.00666948	0.00623266	0.00644033	0.00899134	0.00360266	0.0040822	0.00462272	0.0054004	0.00556395	0.00268134	0.00357712	0.00870593	0.00141407	0.00603809	0.00568264	0.00624885	0.00424669	0.0063602	0.00352915	0.00502162	0.00789383
735	28.274	129.02	Cholesterol	98.5	HMDB0000067	Lipids and lipid-like molecules	Steroids and steroid derivatives	Cholestane steroids	0.666761	0.691188	0.692335	0.688743	0.687245	0.719822	0.688247	0.680726	0.616799	0.621164	0.693751	0.886844	0.701246	0.720645	0.669174	0.610348	0.712673	0.69758	0.574233	0.57459	0.514967	0.565002	0.480974	0.851666	0.911108	0.70762	1.09624	0.685453	0.65283	0.557048	0.598284	0.666344	0.50333	0.635027	0.615188
736	28.379	215.154	5beta-coprostanol	97.4	HMDB0000577	Lipids and lipid-like molecules	Steroids and steroid derivatives	Cholestane steroids	0.00576831	0.00578735	0.00587158	0.00589291	0.00583148	0.00543961	0.00466141	0.00489835	0.00462519	0.005699	0.006359	0.00703995	0.0050835	0.00555191	0.00475656	0.00619268	0.00660848	0.00510283	0.00478696	0.00594968	0.00414957	0.00456742	0.00393097	0.0101385	0.0077232	0.00448003	0.0100678	0.00558353	0.00714365	0.00620251	0.00411914	0.00608282	0.00520908	0.00695448	0.00708553
737	28.557	456.309	Cholesterone	76	HMDB0000921	Lipids and lipid-like molecules	Steroids and steroid derivatives	Cholestane steroids	0.000902816	0.000980982	0.00103238	0.00108201	0.00105264	0.000884146	0.00061531	0.000593265	0.000726057	0.000641756	0.000926794	0.00107941	0.000775579	0.00109531	0.00101112	0.000645814	0.000955502	0.00123072	0.000857638	0.00087351	0.000945883	0.00101517	0.000809683	0.00128559	0.00149118	0.000877632	0.00133033	0.000946481	0.000747	0.000994872	0.00111853	0.0011552	0.000888107	0.00122688	0.00104909
738	28.601	343.179	25-hydroxycholesterol	87	HMDB0006247	Lipids and lipid-like molecules	Steroids and steroid derivatives	Cholestane steroids	0.00108695	0.000876741	0.000705866	0.000974224	0.000954385	0.000823001	0.000895147	0.000682877	0.00059184	0.000775675	0.000648405	0.000757249	0.00123958	0.000998298	0.000592007	0.000838264	0.00102025	0.00115323	0.000638338	0.00061724	0.000714219	0.000749877	0.000761843	0.00118628	0.00112352	0.00101649	0.0016871	0.00133834	0.000305039	0.000548901	0.000804753	0.00104463	0.000601445	0.000934532	0.000941313
739	28.992	456.32	Gallocatechin	64.5	HMDB0038361	Phenylpropanoids and polyketides	Flavonoids	Flavans	0.000400671	0.000451387	0.000525809	0.000445182	0.000451107	0.000339088	0.000309686	0.000301148	0.000285681	0.000274775	0.00026058	0.000390113	0.00028981	0.000239375	0.000250487	0.000274554	0.000334453	0.000231584	0.000294007	0.000238794	0.000227536	0.000349182	0.000245416	0.000417492	0.000597274	0.000325763	0.000558607	0.000303814	0.00034365	0.000210781	0.000356718	0.000300089	0.000208099	0.000299174	0.00030373
740	29.155	386.177	Stigmasterol	81.8	HMDB0000937	Lipids and lipid-like molecules	Steroids and steroid derivatives	Stigmastanes and derivatives	0.000455223	0.000563886	0.000530386	0.000558178	0.000548556	0.000425007	0.000403052	0.00071295	0.000300325	0.000309789	0.000341526	0.000773731	0.000666357	0.000550842	0.000488846	0.000459303	0.000435703	0.000799903	0.000394325	0.000461412	0.000380719	0.0006813	0.00052547	0.000813609	0.000595445	0.000651735	0.000652321	0.000408533	0.000415713	0.000443942	0.000649363	0.000644267	0.000434088	0.000508697	0.000660545
744	29.431	311.264	Labetalol	75.7	HMDB0014736	Benzenoids	Benzene and substituted derivatives	Benzoic acids and derivatives	0.043516	0.0504492	0.0356963	0.0422757	0.0416291	0.0547382	0.0402514	0.0305415	0.0429722	0.0345286	0.0423252	0.0617736	0.00023902	0.0451623	0.05843	0.0485372	0.0438661	0.00886939	0.0495017	0.0636068	0.0446131	0.0662802	0.0319635	0.041205	0.0463119	0.0376151	0.0517869	0.0338231	0.0087134	0.0456998	0.0421031	0.0433793	0.039658	0.0387514	0.0424908

## Sheet: Table S2
Table S2. Metabolites with significantly different levels in the breast muscle of MH60, MH75, TE60 and TE75 chickens as compared with the CON chickens.
Metabolite name	Average Rt(min)	Quant mass	VIP	P-value	FC
MH60 vs. CON
D-fructose-1-phosphate	23.017	387.1	3.80042	0.0208615	0.0438911
Altrose	21.829	319.1	3.0155	0.00125127	5.63622
4-aminophenol	7.78	168	2.99941	0.019736	0.105892
N-acetyl-d-hexosamine	21.873	319.103	2.90676	0.00164478	5.26146
L-sorbose	18.484	204.1	2.55049	0.0284398	4.36055
D-xylulose	16.589	205.1	2.52048	0.000338451	3.51918
1-kestose	24.95	361.139	2.45318	0.00366168	0.271963
D-fructose	18.326	217.1	2.37826	0.0289376	3.69598
D-arabinose	16.606	307.105	2.33059	0.000650037	3.02816
Diclofenac	15.443	214.08	2.30601	0.0198436	0.178476
Norvaline	18.956	144.1	2.25094	0.000572361	2.78372
Alprenolol	19.819	144.1	2.24531	0.000234146	2.72126
L-threo-2-pentulose	16.788	306.108	2.22466	0.00377854	3.00761
Pyruvic acid	6.619	174.007	2.20328	0.0109826	0.293905
Palmitelaidic acid	20.98	311.2	2.15525	0.000280904	2.60939
Glycyl proline	20.51	158.1	2.05827	0.00582567	2.47785
Tyramine	24.451	174.1	2.05661	0.00217242	0.372897
5,7-dihydroxy-4'-methoxyisoflavone	20.558	413.05	2.01308	0.00051456	2.28133
Beta-alanine	8.983	102.057	1.99591	0.0199044	0.346126
Gluconic acid	20.638	333.1	1.97017	0.0059408	2.5284
Quinolinic acid	13.311	251.998	1.9346	0.000495057	0.456073
5-methoxypsoralen	15.418	216.094	1.8952	0.000855181	2.13479
D-ribose	16.293	240.073	1.85115	0.00161766	2.03171
Hypoxanthine	18.433	265.1	1.81264	0.00212527	2.0718
L-methionine	14.343	176.1	1.76402	0.00536615	1.99191
Sophorose	19.881	205.1	1.67745	0.00748815	1.98414
L-glutamic acid	15.838	246.1	1.59545	0.0171804	1.83714
Guanine	17.161	337.1	1.56643	0.00322195	0.590365
Alpha-tocopherol	28.087	237.097	1.554	3.75686e-06	1.59516
(r)-3-hydroxybutyric acid	8.429	147.02	1.5376	0.027886	1.77841
Guanosine	25.62	324.1	1.4827	0.00630835	1.71374
D-ribulose 5-phosphate	22.341	315.085	1.46803	0.0163305	1.62179
Uridine	24.018	217.1	1.45863	0.00270668	1.53719
Urea	10.214	189.067	1.41964	0.0238227	0.614964
Citrulline	18.66	157.1	1.40278	0.0108049	1.61439
Malic acid	13.848	147.025	1.34672	0.0228761	1.71989
L-arabitol	17	217.1	1.32084	0.0401941	1.61924
L-aspartic acid	14.364	232.1	1.31779	0.0382314	1.78561
1-o-hexadecylglycerol	24.231	205.1	1.31637	0.00851129	1.46937
3-methylhistidine	19.133	96.0455	1.26874	0.0367598	1.52447
2,3-dihydrobutyraldehyde 1-phosphate	21.722	357.1	1.23484	0.0109518	1.43391
1-hexacosanol	20.333	299.2	1.20044	0.0191972	1.35755
N-methylalanine	8.629	130.1	1.19743	0.00505385	0.706751
Oxoproline	14.38	156.098	1.19197	0.0293264	1.47249
Glucosaminic acid	20.622	221.079	1.13175	0.00603278	1.33325
O-phosphoethanolamine	18.074	174.1	1.09633	0.00821581	1.33663
Noradrenaline	13.109	243.06	1.088	0.0194797	1.29749
Mucic acid	15.713	335.115	1.08356	0.0491857	1.42666
Squalene	25.951	95.0833	1.08238	0.027488	0.734915
1-monostearin	24.793	409.196	1.0685	0.0252938	0.738412
L-tyrosine	20.056	218.1	1.06491	0.0496272	1.40371
Dodecanol	26.243	243.016	1.03207	0.00925849	1.32126
L-phenylalanine	15.937	218.1	1.02335	0.037626	1.35052
Sorbitol	19.968	319.1	1.01044	0.0471853	1.43824
MH75 vs. CON
L-sorbose	18.484	204.1	2.83082	0.0160679	5.96646
Beta-alanine	8.983	102.057	2.73724	0.00410146	0.164617
Tyramine	24.451	174.1	2.60885	0.000287516	0.225028
D-fructose	18.326	217.1	2.57582	0.0441896	4.57713
Glucose-1-phosphate	17.872	217.1	2.45162	0.0364774	5.60564
D-tagatose	19.32	103.003	2.34135	0.0380066	3.62871
4-aminomethylcyclohexane carboxylic acid	24.438	174.1	2.16665	0.00916934	0.247155
D-fructose-1-phosphate	23.017	387.1	2.13837	0.0459154	0.199265
Altrose	21.829	319.1	2.12585	0.013378	2.84016
1,2,4-benzenetriol	12.476	180.01	2.09593	0.000323854	2.66141
N-acetyl-d-hexosamine	21.873	319.103	2.08171	0.00931306	2.75453
2-aminoethyl methacrylate	21.68	174.1	2.0752	0.000261617	0.383755
Norvaline	18.956	144.1	1.95524	0.000338921	2.38331
Quinolinic acid	13.311	251.998	1.89757	0.000432291	0.450371
Alprenolol	19.819	144.1	1.8309	0.0038072	2.241
D-ribose-5-phosphate	15.189	299.04	1.80867	0.000143941	0.492126
D-xylulose	16.589	205.1	1.8042	0.0104898	2.28564
Cerotinic acid	26.009	486.154	1.74724	0.00677214	2.15351
3-methylhistidine	19.133	96.0455	1.73566	0.000549815	2.00868
5-methoxypsoralen	15.418	216.094	1.71477	0.00129023	1.96343
D-arabinose	16.606	307.105	1.69513	0.00215249	1.99154
2-piperidinobenzonitrile	11.902	185.004	1.68203	5.9133e-07	1.77681
4-hydroxyproline	14.451	230.1	1.67417	0.00139304	0.506998
Xanthosine	25.149	221.093	1.63484	9.81322e-06	1.74056
1-hexacosanol	20.333	299.2	1.62812	0.000288212	1.76409
Isohexonic acid	20.673	260.036	1.62594	0.00571848	1.88729
Behenic acid	25.038	397.277	1.61617	6.12419e-05	1.74524
Noradrenaline	13.109	243.06	1.59737	4.78581e-05	1.71327
Ornithine	18.536	142.1	1.57722	0.00485467	0.523161
5,7-dihydroxy-4'-methoxyisoflavone	20.558	413.05	1.56125	0.00585446	1.79597
Phthalic acid	7.92	96	1.5361	0.000577525	0.57877
Altro-2-heptulose-7-phosphate	23.338	174.1	1.53374	0.017413	0.511363
2-amino-7,10-dimethyldibenzo[b,f][1,4]oxazepin-11(10h)-one	20.788	326.105	1.51504	0.00171616	0.576846
Allantoin	15.537	188.1	1.49958	0.0292752	0.472601
Propyl alcohol	22.869	117	1.45579	0.0136833	1.94713
Gluconic acid	20.638	333.1	1.45223	0.0128225	1.75276
N-acetyl-5-hydroxytryptamine	17.537	103.002	1.44179	1.94998e-05	1.55698
Chenodeoxycholic acid	20.271	194	1.4417	0.0016908	1.6408
Squalene	25.951	95.0833	1.4387	0.000131403	0.633264
Glycyl proline	20.51	158.1	1.43343	0.0466196	1.76114
Glucosaminic acid	20.622	221.079	1.4284	2.87764e-05	1.53978
Uric acid	21.67	311.169	1.41798	0.000104318	1.53784
1-tetracosanol	25.099	411.178	1.41754	1.98343e-06	1.51411
D-ribulose 5-phosphate	22.341	315.085	1.4073	0.0290512	1.70568
L-cystine	7.965	146.09	1.40265	0.0312857	1.70566
Erythronic acid	14.66	292.1	1.39088	0.0197877	0.541996
7-methylguanine	10.949	294.116	1.38907	2.1311e-05	1.50551
Pantothenic acid	20.598	103.01	1.35908	0.0314781	0.563725
D-myo-inositol 4-phosphate	23.79	221.094	1.34138	0.000105188	1.47254
3,17,20-trihydroxy-pregn-5-en-11-one	14.582	447.1	1.32376	0.00604397	0.638576
Sophorose	19.881	205.1	1.25767	0.0449113	1.70703
N-methylalanine	8.629	130.1	1.24955	0.00475062	0.679053
Glycerol-3-galactoside	14.476	113	1.23914	0.0110973	0.643841
Putrescine	17.491	174.1	1.23534	0.00596248	0.659856
1-hexanol	5.752	159.1	1.17655	1.40892e-05	1.33787
2,3-dihydrobutyraldehyde 1-phosphate	21.722	357.1	1.15894	0.015467	1.45149
L-proline	10.778	142.1	1.15011	0.0122517	0.685959
Tetracosanoic acid	26.031	425.339	1.13394	0.00140732	1.35108
N-acetylputrescine	14.121	174.1	1.11748	2.42334e-06	1.2925
Beta-hydroxymyristic acid	13.704	281.021	1.10275	0.000149934	1.30556
Octadecanol	22.106	327.272	1.09487	0.000359418	1.30489
Benzylalcohol	5.781	164.969	1.08871	0.00118486	1.33192
Malonic acid	12.434	305.06	1.08657	0.0287163	1.43924
Dodecanoic acid, isopropanol ester	10.028	102.059	1.06976	1.35885e-05	0.783754
Harmol	12.65	270.073	1.03974	0.0425733	1.4038
2-picolinic acid	6.317	136.007	1.03354	0.000707851	1.28203
1-methylhydantoin	11.527	152.029	1.02205	0.000447959	0.787904
Phosphoglycolic acid	27.198	299.053	1.01898	0.021923	0.743864
Metharbital	10.569	180.948	1.00105	0.0138186	0.757192
TE60 vs. CON
N-acetylgalactosamine	21.454	147	3.79306	0.0104363	2.61457
Ferulic acid	12.082	308.047	3.51769	0.0102244	0.103292
Altrose	21.829	319.1	2.76905	0.00478101	4.44257
Tyramine	24.451	174.1	2.64179	0.000258905	0.26807
N-acetyl-d-hexosamine	21.873	319.103	2.6245	0.00563541	4.29839
Cadaverine	18.801	174.1	2.62333	0.0345066	5.64123
Beta-alanine	8.983	102.057	2.3306	0.00949176	0.277845
Altro-2-heptulose-7-phosphate	23.338	174.1	2.26563	0.00163386	0.359332
Guanine	17.161	337.1	2.22389	0.00125994	0.437715
5,7-dihydroxy-4'-methoxyisoflavone	20.558	413.05	2.19331	0.000351648	2.27797
2-aminoethyl methacrylate	21.68	174.1	2.16411	0.000589936	0.415428
Naproxen	15.143	185.096	2.13132	0.0280511	0.352887
(r)-3-hydroxybutyric acid	8.429	147.02	2.11028	0.00176414	2.34878
1,2,4-benzenetriol	12.476	180.01	2.10887	0.0291796	2.90391
Quinolinic acid	13.311	251.998	1.90639	0.00132811	0.497909
Hypoxanthine	18.433	265.1	1.8366	0.00478518	1.93581
Palmitelaidic acid	20.98	311.2	1.8294	0.00470215	1.92617
4-aminomethylcyclohexane carboxylic acid	24.438	174.1	1.8207	0.0133369	0.325973
Behenic acid	25.038	397.277	1.77945	0.00123936	1.77949
3-hydroxy-(3beta,5alpha)-androstan-17-one	25.914	375.108	1.77211	0.00276521	0.556366
1-hexacosanol	20.333	299.2	1.71647	0.000635471	1.63315
Allantoin	15.537	188.1	1.71565	0.0382391	0.462136
Noradrenaline	13.109	243.06	1.63388	0.000337962	1.578
Pantothenic acid	20.598	103.01	1.59116	0.0201182	0.548158
2-monoolein	25.392	103	1.59113	0.00381951	0.593674
D-arabinose	16.606	307.105	1.58865	0.0286018	1.82679
2-piperidinobenzonitrile	11.902	185.004	1.54685	5.56826e-05	1.48983
2-monostearin	25.394	129.1	1.54016	0.00399848	0.609192
2-amino-7,10-dimethyldibenzo[b,f][1,4]oxazepin-11(10h)-one	20.788	326.105	1.52183	0.00332119	0.633273
L-cysteine-glycine	11.727	358.973	1.49625	0.029223	0.575586
Squalene	25.951	95.0833	1.44835	0.00219279	0.667642
Tetracosanoic acid	26.031	425.339	1.41954	0.000709387	1.43923
4-hydroxyproline	14.451	230.1	1.41817	0.0213569	0.625465
Malic acid	13.848	147.025	1.40171	0.0224392	1.57245
3,17,20-trihydroxy-pregn-5-en-11-one	14.582	447.1	1.39815	0.00844754	0.65324
Indoxyl sulfate	15.624	277.053	1.39708	0.00234214	0.672748
Cholesterone	28.557	456.309	1.38535	0.017314	1.52216
Xanthosine	25.149	221.093	1.37457	0.00212517	1.41952
O-phosphoethanolamine	18.074	174.1	1.35535	0.0162391	1.50179
Piceatannol	24.905	479.2	1.30207	0.0124696	0.681056
Glycerol-3-galactoside	14.476	113	1.27187	0.0166728	0.674082
Uric acid	21.67	311.169	1.26811	0.0112908	1.37709
D-myo-inositol 4-phosphate	23.79	221.094	1.26167	0.00207399	1.33951
Glucosaminic acid	20.622	221.079	1.2363	0.00181019	1.32263
Glycocyamine	15.256	171.076	1.23579	0.00351286	0.728309
Gallocatechin	28.992	456.32	1.23336	0.0334778	1.43798
Fumaric acid	11.677	245.018	1.21268	0.0461333	1.46151
N-{2-hydroxyethyl}tetradecan-1-amine	9.126	226.04	1.17159	0.00536389	0.752293
13beta-ethyl-3-oximinogon-4-en-17-one	20.269	373.136	1.12611	0.00681866	0.769175
L-asparagine	16.538	116.088	1.11333	0.018287	0.727833
5beta-coprostanol	28.379	215.154	1.10403	0.0452565	1.42465
N-acetylornithine	13.892	174.1	1.05026	0.00163645	1.22683
L-proline	10.778	142.1	1.04082	0.0345294	0.732708
1-methyladenosine	22.428	259.083	1.0197	0.015112	1.24653
N-methylalanine	8.629	130.1	1.00452	0.0220823	0.778296
TE75 vs. CON
Dehydroascorbic acid	14.916	314.1	2.94905	0.0246786	0.276585
Beta-alanine	8.983	102.057	2.68002	0.00239469	0.100313
4-aminomethylcyclohexane carboxylic acid	24.438	174.1	2.58906	0.00324302	0.122228
L-sorbose	18.484	204.1	2.47239	0.00623666	6.56046
Tyramine	24.451	174.1	2.457	0.000102975	0.163719
Ferulic acid	12.082	308.047	2.44557	0.0126747	0.134528
L-glutamine dehydrated	15.378	227.1	2.4305	0.0227207	0.138938
D-tagatose	19.32	103.003	2.40275	0.00549742	5.56292
D-fructose	18.326	217.1	2.39556	0.00550322	5.79652
Altrose	21.829	319.1	2.34277	0.000164192	4.5614
N-acetyl-d-hexosamine	21.873	319.103	2.27146	0.000219845	4.31869
Glucose-1-phosphate	17.872	217.1	2.22523	0.00232838	5.31426
D-fructose-1-phosphate	23.017	387.1	2.18279	0.0476358	0.182901
1-kestose	24.95	361.139	2.13881	0.00278681	0.228317
Mannose 6-phosphate	23.193	387.1	2.06918	0.0217425	3.95367
2-aminoethyl methacrylate	21.68	174.1	2.03221	0.00018863	0.292308
Pantothenic acid	20.598	103.01	1.97698	0.00147016	0.298406
Glucose 6-phosphate	23.588	299.037	1.91493	0.0424721	3.679
Naproxen	15.143	185.096	1.89374	0.00788455	0.252885
Guanine	17.161	337.1	1.85062	4.88291e-05	0.359672
Quinolinic acid	13.311	251.998	1.79211	8.35857e-05	0.376987
Altro-2-heptulose-7-phosphate	23.338	174.1	1.73276	0.001523	0.367038
2-amino-7,10-dimethyldibenzo[b,f][1,4]oxazepin-11(10h)-one	20.788	326.105	1.72997	5.2744e-05	0.413208
Spermine	22.402	200.096	1.68681	0.00867019	2.38164
Glycerol-3-galactoside	14.476	113	1.68247	0.000290065	0.41149
Putrescine	17.491	174.1	1.67629	0.0211484	0.509032
D-ribose-5-phosphate	15.189	299.04	1.63813	4.21967e-05	0.456938
Isohexonic acid	20.673	260.036	1.62884	0.000228548	2.24325
Norvaline	18.956	144.1	1.62768	0.0011863	2.4463
D-xylulose	16.589	205.1	1.59874	0.000622703	2.27609
Allantoin	15.537	188.1	1.5854	0.0135091	0.381308
D-arabinose	16.606	307.105	1.57182	0.00140076	2.27528
Dl-dopa	17.065	218.1	1.56236	0.00168414	0.450073
Noradrenaline	13.109	243.06	1.56015	3.53757e-06	2.02328
2-piperidinobenzonitrile	11.902	185.004	1.54551	2.75999e-07	1.97344
1-hexacosanol	20.333	299.2	1.54181	1.55935e-05	1.99163
5,7-dihydroxy-4'-methoxyisoflavone	20.558	413.05	1.53557	0.000501793	2.0972
Alprenolol	19.819	144.1	1.46584	0.00192701	2.05459
Xanthosine	25.149	221.093	1.45847	3.61529e-05	1.88547
Phthalic acid	7.92	96	1.45211	0.000176276	0.508764
3-hydroxy-(3beta,5alpha)-androstan-17-one	25.914	375.108	1.40014	0.00287661	0.530708
Ornithine	18.536	142.1	1.39778	0.00306595	0.500476
Pseudo uridine	23.311	217.1	1.38652	0.0286694	2.67674
Aminoadipic acid	17.202	260.115	1.35728	0.0013893	0.538963
L-proline	10.778	142.1	1.35459	0.00100136	0.549222
Glucosaminic acid	20.622	221.079	1.35078	9.62617e-06	1.71408
3,17,20-trihydroxy-pregn-5-en-11-one	14.582	447.1	1.3431	0.00163084	0.555725
L-asparagine	16.538	116.088	1.34071	0.000732639	0.564301
Indoxyl sulfate	15.624	277.053	1.30394	0.000236157	0.592674
Gluconic acid	20.638	333.1	1.29698	0.00847672	1.86165
Behenic acid	25.038	397.277	1.2963	3.01686e-05	1.64984
D-myo-inositol 4-phosphate	23.79	221.094	1.28982	4.23365e-05	1.65007
Scyllo-inositol	20.916	204.1	1.28246	0.00182643	1.73938
N-{2-hydroxyethyl}tetradecan-1-amine	9.126	226.04	1.27594	0.000182207	0.603715
Melezitose	20.222	217.1	1.27439	0.00571733	1.78608
Glucose	19.745	319.1	1.2685	0.00658034	1.78259
Uric acid	21.67	311.169	1.2594	0.000109637	1.62193
Erythronic acid	14.66	292.1	1.24931	0.0201806	0.518708
1-methylhydantoin	11.527	152.029	1.23518	5.99842e-06	0.642198
Squalene	25.951	95.0833	1.232	0.000354274	0.620333
L-threo-2-pentulose	16.788	306.108	1.22148	0.0199768	1.79637
Ethyl beta-d-galactofuranoside	18.837	217.1	1.20864	0.0244423	1.85236
Metharbital	10.569	180.948	1.20452	8.56781e-05	0.642834
Leucine	10.676	146.106	1.19468	0.00118006	0.618666
Tocopherol acetate	20.434	217.1	1.19096	0.0440522	1.82224
Phosphoglycolic acid	27.198	299.053	1.18558	0.00771915	0.614142
1,5-anhydroglucitol	15.102	240.061	1.18546	0.000305292	0.644987
Citric acid	18.552	273.093	1.18247	0.0271796	0.546517
5-methoxypsoralen	15.418	216.094	1.17207	0.00142771	1.5825
3-methylhistidine	19.133	96.0455	1.15775	0.00791944	1.61451
1,2,4-benzenetriol	12.476	180.01	1.14301	0.0157762	1.73829
L-tryptophan	22.497	202.1	1.1413	0.0120194	0.622801
L-glutamine	17.984	156.1	1.12811	0.00994546	0.601012
Chenodeoxycholic acid	20.271	194	1.12501	0.00035969	1.49491
Tetracosanoic acid	26.031	425.339	1.12005	0.000350752	1.48146
Urea	10.214	189.067	1.10157	0.029853	0.617278
D-mannose	20.429	204.1	1.09421	0.0402719	1.66073
Cholesterone	28.557	456.309	1.08003	0.00122182	1.4662
Hypoxanthine	18.433	265.1	1.06627	0.00843782	1.50473
Dodecanoic acid, isopropanol ester	10.028	102.059	1.04762	8.18453e-06	0.721128
Lauric acid	16.354	257.137	1.03835	5.02879e-05	1.38252
5'-deoxy-5'-methylthioadenosine	25.785	236.092	1.0367	0.0082464	0.674023
N-methylalanine	8.629	130.1	1.03064	0.00483405	0.676547
N-acetylputrescine	14.121	174.1	1.02579	9.83649e-07	1.35246
Phytol	9.734	143	1.01804	0.0159018	0.679768
L-lysine	19.864	174.1	1.00702	0.015926	0.663086
3-hydroxyisovaleric acid	9.364	131.1	1.00287	0.0335859	0.643525

## Sheet: Table S3
Table S3. Metabolites with significantly different levels in the breast muscle of MH60 vs. TE60, MH75 vs. TE75, MH75 vs. MH60 and TE75 vs. TE60 groups.
Metabolite name	Average Rt(min)	Quant mass	VIP	P-value	FC
MH60 vs. TE60
N-acetylgalactosamine	21.454	147	3.61401	0.0352904	0.455014
Ferulic acid	12.082	308.047	2.73854	0.0361646	3.97834
Norvaline	18.956	144.1	2.67419	0.000621829	2.76786
Glycyl proline	20.51	158.1	2.60781	0.00187506	2.73043
Alprenolol	19.819	144.1	2.55547	0.00013043	2.52944
Butanedioic acid	11.074	147.039	2.39379	0.0493425	0.239508
D-ribose	16.293	240.073	2.2443	0.000507223	2.11177
L-threo-2-pentulose	16.788	306.108	2.2317	0.015696	2.29525
Gluconic acid	20.638	333.1	2.17201	0.00607705	2.34672
D-ribulose 5-phosphate	22.341	315.085	2.00905	0.00381068	1.80768
D-xylulose	16.589	205.1	1.77055	0.0463607	1.71057
Trimethoprim	18.123	419.197	1.75468	0.0162583	1.81284
2-monostearin	25.394	129.1	1.74813	0.0133422	2.00135
Behenic acid	25.038	397.277	1.69581	0.00193385	0.641948
Mucic acid	15.713	335.115	1.69166	0.0124952	1.73219
2-monoolein	25.392	103	1.67495	0.0171692	2.02912
Glycyl tyrosine	25.716	174.1	1.66519	0.00517743	1.56543
L-methionine	14.343	176.1	1.63763	0.0125421	1.61134
D-arabinose	16.606	307.105	1.63103	0.0285544	1.65764
5-methoxypsoralen	15.418	216.094	1.63081	0.0199191	1.63268
1-o-hexadecylglycerol	24.231	205.1	1.60778	0.00795445	1.50324
Piceatannol	24.905	479.2	1.60718	0.0214871	1.62768
Altro-2-heptulose-7-phosphate	23.338	174.1	1.60379	0.0320235	1.92632
Dodecanol	26.243	243.016	1.57251	0.00160124	1.49982
Tetracosanoic acid	26.031	425.339	1.56028	0.00014304	0.699233
Cerotinic acid	26.009	486.154	1.47731	0.0214314	1.65474
3,4-dimethoxyphenylethylamine	24.411	174.1	1.46002	0.0317823	1.6224
3-hydroxyisovaleric acid	9.364	131.1	1.36289	0.0479928	1.47548
D-ribose 5-phosphate	21.624	217.1	1.34578	0.0393924	1.42295
Leucine	10.676	146.106	1.33312	0.00263487	1.32617
Gallocatechin	28.992	456.32	1.33179	0.0461061	0.698497
Pantothenic acid	20.598	103.01	1.3128	0.0317223	1.51577
L-asparagine	16.538	116.088	1.29573	0.0209814	1.38604
Monooleoylglycerol	25.583	397.3	1.27498	0.0267288	1.42886
Digalacturonic acid	16.726	243.1	1.27358	0.0381361	1.41988
L-tyrosine	20.056	218.1	1.26795	0.0398048	1.42046
L-phenylalanine	15.937	218.1	1.26089	0.0222009	1.36422
2-piperidinobenzonitrile	11.902	185.004	1.23805	3.26289e-05	0.806961
2-amino-7,10-dimethyldibenzo[b,f][1,4]oxazepin-11(10h)-one	20.788	326.105	1.16691	0.0240359	1.34555
N-{2-hydroxyethyl}tetradecan-1-amine	9.126	226.04	1.16448	0.00197744	1.259
Uridine	24.018	217.1	1.15474	0.0057826	1.27444
Noradrenaline	13.109	243.06	1.15328	0.000554594	0.82224
L-histidine	13.011	94.0455	1.13284	0.00490282	0.797065
Linoleic acid	22.527	337.2	1.09615	0.0342102	1.27651
Pentadecanoic acid	20.197	299.156	1.09289	0.00985253	0.812522
3,17,20-trihydroxy-pregn-5-en-11-one	14.582	447.1	1.06371	0.0062509	1.22739
1-hexacosanol	20.333	299.2	1.03674	0.00991755	0.831244
MH75 vs. TE75
Quinic acid	19.066	117.1	3.70915	0.0231006	0.240098
L-glutamine dehydrated	15.378	227.1	3.69139	0.0120477	8.86794
Guanine	17.161	337.1	2.49986	0.000819637	2.31334
Trimethoprim	18.123	419.197	2.45371	0.000421569	2.12586
Butanedioic acid	11.074	147.039	2.38943	0.0421121	4.3911
3,5-dimethyl-benzoic acid	13.982	207.067	2.32565	0.00705069	1.97802
Dl-dopa	17.065	218.1	2.28995	0.00798637	2.09923
Spermine	22.402	200.096	2.24689	0.016964	0.506516
D-ribulose 5-phosphate	22.341	315.085	1.97739	0.00557383	1.72848
Pantothenic acid	20.598	103.01	1.96809	0.0180114	1.88912
5'-deoxy-5'-methylthioadenosine	25.785	236.092	1.83434	0.00532786	1.57364
L-glutamine	17.984	156.1	1.82706	0.00363791	1.627
L-2-hydroxyglutaric acid	15.176	247.097	1.81627	0.0102632	1.65949
N-acetylaspartic acid	16.366	158.1	1.74917	0.0377865	3.60954
Altrose	21.829	319.1	1.73908	0.0294917	0.622651
Homoserine	13.243	218.104	1.70917	0.00154196	1.45148
Piceatannol	24.905	479.2	1.69372	0.00607498	1.5169
Glycerol-3-galactoside	14.476	113	1.6897	0.0102274	1.56466
N-acetyl-d-hexosamine	21.873	319.103	1.66316	0.0369619	0.637816
L-asparagine	16.538	116.088	1.62195	0.00650566	1.48477
13beta-ethyl-3-oximinogon-4-en-17-one	20.269	373.136	1.58345	0.000897129	1.39771
7-methylguanine	10.949	294.116	1.53723	0.00124966	1.37679
Harmol	12.65	270.073	1.52028	0.0444793	1.46391
Dimethylglycine	5.725	160.049	1.49686	0.00191431	1.38935
3-hydroxyisovaleric acid	9.364	131.1	1.4963	0.0224489	1.46171
Indoxyl sulfate	15.624	277.053	1.48946	0.000712844	1.33209
1,2,4-benzenetriol	12.476	180.01	1.48833	0.0311835	1.53105
N-{2-hydroxyethyl}tetradecan-1-amine	9.126	226.04	1.45639	5.90791e-05	1.29378
Kojic acid	13.923	271.1	1.40612	0.000315451	1.29446
Melezitose	20.222	217.1	1.40327	0.0412572	0.7009
2-amino-7,10-dimethyldibenzo[b,f][1,4]oxazepin-11(10h)-one	20.788	326.105	1.39509	0.022512	1.39602
Digalacturonic acid	16.726	243.1	1.3456	0.010758	1.3296
1-methylhydantoin	11.527	152.029	1.32322	1.72784e-05	1.22689
Glycine	10.905	174.1	1.31261	0.00786833	1.3137
Inosine-5'-monophosphate	26.865	315.1	1.30622	0.0454589	1.33877
Cyano-l-alanine	15.039	141.003	1.29915	0.000286407	1.22777
Scyllo-inositol	20.916	204.1	1.29839	0.0330729	0.740306
Glycolic acid	7.039	177.062	1.27906	0.00213	1.25283
Xanthurenic acid	22.355	177.07	1.19884	0.018058	1.29232
Guanidinosuccinate	15.406	343.067	1.19761	0.0241412	1.31078
2-amino-3-(3,4-dimethoxyphenyl)-4h-benzo[g]chromen-4-one	18.614	147.054	1.19676	0.00687106	1.2393
2-picolinic acid	6.317	136.007	1.14943	0.00286281	1.19987
Noradrenaline	13.109	243.06	1.13439	0.000347711	0.846779
L-proline	10.778	142.1	1.13423	0.0286727	1.24896
Spermidine	17.512	130.1	1.1239	0.00306709	1.18522
L-valine	9.369	144.1	1.11214	0.0148498	1.23713
1-tetracosanol	25.099	411.178	1.09636	0.0145825	1.20659
1-hexanol	5.752	159.1	1.09525	0.00795956	1.19635
N-acetyl-d-mannosamine	17.513	147.056	1.09377	0.00278932	1.17236
3-hydroxyphenylacetic acid	7.256	163.012	1.09332	0.00061807	1.1709
Leucine	10.676	146.106	1.06197	0.0317127	1.23328
Glycocyamine	15.256	171.076	1.01511	0.0228278	1.19801
MH75 vs. MH60
D-fructose-1-phosphate	23.017	387.1	2.93647	0.00632024	4.53999
4-aminophenol	7.78	168	2.74893	0.0145878	3.3288
Butanedioic acid	11.074	147.039	2.51785	0.0318015	5.80392
D-ribose-5-phosphate	15.189	299.04	2.28864	0.000262012	0.44005
1,2,4-benzenetriol	12.476	180.01	2.11211	0.000899007	2.10878
Pyruvic acid	6.619	174.007	2.01197	0.0123521	2.21328
L-cystine	7.965	146.09	1.93505	0.0090375	1.92585
N-methyldiethanolamine	13.716	160.017	1.89443	0.0215117	0.445608
Phthalic acid	7.92	96	1.80674	0.00192641	0.574004
Altrose	21.829	319.1	1.80234	0.0275743	0.503912
L-arabitol	17	217.1	1.79654	0.0363815	0.543932
L-glutamic acid	15.838	246.1	1.77967	0.0169371	0.5547
7-methylguanine	10.949	294.116	1.77244	4.41839e-06	1.59949
Isothreonic acid	14.913	292.095	1.73894	0.00880224	0.552138
2-aminoethyl methacrylate	21.68	174.1	1.73658	0.0352139	0.485485
L-threo-2-pentulose	16.788	306.108	1.71893	0.044785	0.541064
Behenic acid	25.038	397.277	1.7088	9.93364e-06	1.52778
N-acetyl-5-hydroxytryptamine	17.537	103.002	1.70508	2.94933e-05	1.55534
N-acetyl-d-hexosamine	21.873	319.103	1.68098	0.0359927	0.523529
Isohexonic acid	20.673	260.036	1.66502	0.00531044	1.6522
2-piperidinobenzonitrile	11.902	185.004	1.65914	9.31935e-09	1.47792
Xanthosine	25.149	221.093	1.49462	8.63894e-06	1.39091
4-hydroxyproline	14.451	230.1	1.47663	0.0282164	0.634184
Isoheptadecanoic acid	16.332	401.169	1.47179	1.85709e-05	1.39333
D-ribose	16.293	240.073	1.45235	0.024378	0.667269
L-lysine	19.864	174.1	1.45217	0.0097917	0.665205
Putrescine	17.491	174.1	1.43525	0.0070202	0.676407
2-oxo-propanoic acid	7.224	217	1.43095	0.0171411	1.51428
2-amino-7,10-dimethyldibenzo[b,f][1,4]oxazepin-11(10h)-one	20.788	326.105	1.41827	0.0101105	0.676968
L-2-hydroxyglutaric acid	15.176	247.097	1.39251	0.0166986	1.53894
Tetracosanoic acid	26.031	425.339	1.36316	0.000157099	1.34255
Noradrenaline	13.109	243.06	1.36248	6.938e-06	1.32044
D-arabinose	16.606	307.105	1.34579	0.0325489	0.657672
Oxoproline	14.38	156.098	1.3412	0.0220318	0.686431
Leucine	10.676	146.106	1.32974	0.00182031	0.742604
Citrulline	18.66	157.1	1.3162	0.0301237	0.692296
Hypoxanthine	18.433	265.1	1.30463	0.0426237	0.678061
L-tyrosine	20.056	218.1	1.30141	0.0337707	0.680938
Dodecanoic acid, isopropanol ester	10.028	102.059	1.30107	8.94107e-06	0.779141
Uracil	11.439	241.066	1.29504	0.0252849	0.698412
1-tetracosanol	25.099	411.178	1.2876	0.000437196	1.30498
Guanosine	25.62	324.1	1.28062	0.0332512	0.684878
Octadecanol	22.106	327.272	1.25433	0.000208451	1.28752
1-hexacosanol	20.333	299.2	1.24296	0.0026879	1.29947
Digalacturonic acid	16.726	243.1	1.21266	0.0139898	0.72823
1-o-hexadecylglycerol	24.231	205.1	1.20147	0.00929375	0.745666
2-picolinic acid	6.317	136.007	1.18875	0.00196009	1.28068
Arachidonic acid	23.598	91.04	1.17621	0.0176547	0.74157
Cyano-l-alanine	15.039	141.003	1.16948	0.000307318	1.25167
Uric acid	21.67	311.169	1.16505	0.000103227	1.24488
2-amino-3-(3,4-dimethoxyphenyl)-4h-benzo[g]chromen-4-one	18.614	147.054	1.15316	0.00276959	1.27252
D-myo-inositol 4-phosphate	23.79	221.094	1.1529	1.55287e-05	1.22226
3,17,20-trihydroxy-pregn-5-en-11-one	14.582	447.1	1.15007	0.00165544	0.796449
N-acetyl-d-mannosamine	17.513	147.056	1.13011	0.000601424	1.2379
Carbamic acid	6.24	147.024	1.12601	0.000339326	1.23145
N-acetylputrescine	14.121	174.1	1.12117	5.51379e-07	1.19907
L-phenylalanine	15.937	218.1	1.11594	0.0495462	0.747364
Spermidine	17.512	130.1	1.10127	0.00101058	1.23097
Cholesterol	28.274	129.02	1.09532	0.0116029	0.792234
4-methylvaleric acid	7.32	173.1	1.09361	0.000337787	1.21697
Benzylalcohol	5.781	164.969	1.09237	0.00073839	1.21713
Pentobarbital	14.959	141.003	1.08755	0.00630361	1.24293
L-threonine	12.196	218.1	1.08437	0.0199721	0.785103
3-hydroxyisovaleric acid	9.364	131.1	1.07771	0.0325764	0.767926
1-methylhydantoin	11.527	152.029	1.07699	0.000543597	0.826333
Uridine	24.018	217.1	1.07115	0.0116801	0.795033
1-hexanol	5.752	159.1	1.04172	0.00303444	1.21474
L-valine	9.369	144.1	1.03719	0.0368524	0.783737
L-proline	10.778	142.1	1.03565	0.0242362	0.797483
N-{2-hydroxyethyl}tetradecan-1-amine	9.126	226.04	1.0336	0.00367351	0.824673
L-isoleucine	10.684	158.1	1.0291	0.0464661	0.781824
Serotonin	14.084	232.102	1.02155	0.00948383	0.822182
Beta-hydroxymyristic acid	13.704	281.021	1.00031	0.00308526	1.20075
TE75 vs. TE60
Dehydroascorbic acid	14.916	314.1	3.70764	0.0481859	0.328785
Methylphosphonic acid	24.28	225	3.19628	0.0494911	201.226
Cadaverine	18.801	174.1	2.6705	0.0329749	0.1686
4-aminomethylcyclohexane carboxylic acid	24.438	174.1	2.64924	0.00542744	0.374962
N-acetylgalactosamine	21.454	147	2.54344	0.0256367	0.507474
Beta-alanine	8.983	102.057	2.46058	0.000448515	0.361039
D-fructose	18.326	217.1	2.33392	0.0113979	3.46053
Glucose 6-phosphate	23.588	299.037	2.30561	0.0263092	4.3292
Putrescine	17.491	174.1	2.30341	0.028192	0.518687
L-sorbose	18.484	204.1	2.30046	0.0180906	3.3105
Norvaline	18.956	144.1	2.2221	0.00130678	2.43236
Mannose 6-phosphate	23.193	387.1	2.02269	0.0371359	2.97545
N-acetylaspartic acid	16.366	158.1	1.99716	0.00754153	0.442397
Glucose-1-phosphate	17.872	217.1	1.99714	0.0174786	2.65491
Alprenolol	19.819	144.1	1.89489	0.000875988	1.90976
D-ribose-5-phosphate	15.189	299.04	1.87382	0.0123147	0.481654
Tocopherol acetate	20.434	217.1	1.84039	0.011219	2.14333
Uracil	11.439	241.066	1.81453	0.000287963	0.554114
Pantothenic acid	20.598	103.01	1.80753	0.00591448	0.54438
Aminoadipic acid	17.202	260.115	1.74428	0.0136952	0.523436
D-mannose	20.429	204.1	1.70952	0.00752638	1.91197
Ethyl beta-d-galactofuranoside	18.837	217.1	1.67125	0.0120281	1.9412
Isohexonic acid	20.673	260.036	1.63262	0.00029044	1.63867
Tyramine	24.451	174.1	1.61729	0.0212522	0.610732
Gluconic acid	20.638	333.1	1.61387	0.0062946	1.72788
Glycerol-3-galactoside	14.476	113	1.60747	0.00448854	0.610445
Pseudo uridine	23.311	217.1	1.55549	0.046334	2.3051
2-amino-7,10-dimethyldibenzo[b,f][1,4]oxazepin-11(10h)-one	20.788	326.105	1.53899	0.00218631	0.652496
L-lysine	19.864	174.1	1.51996	0.0331971	0.590485
Cerotinic acid	26.009	486.154	1.50172	0.0493346	1.92529
2-monoolein	25.392	103	1.48786	0.0491636	1.97084
Melezitose	20.222	217.1	1.44249	0.0389339	1.62008
O-phosphoserine	18.774	356.1	1.43963	0.0225463	0.628411
Glucose	19.745	319.1	1.42125	0.0497371	1.60145
Metharbital	10.569	180.948	1.39442	4.07012e-05	0.726274
Glycyl proline	20.51	158.1	1.34773	0.0394529	1.57337
Gallocatechin	28.992	456.32	1.31153	0.0284457	0.65915
2-piperidinobenzonitrile	11.902	185.004	1.29577	2.91437e-06	1.32461
(r)-3-hydroxybutyric acid	8.429	147.02	1.28033	0.0282325	0.658559
Dimethylglycine	5.725	160.049	1.26641	0.049443	0.665297
Glucosaminic acid	20.622	221.079	1.21954	2.22909e-05	1.29597
Phthalic acid	7.92	96	1.21678	0.0487412	0.65292
Cholesterol	28.274	129.02	1.20979	0.0128236	0.728906
Xanthosine	25.149	221.093	1.20857	0.00120443	1.32824
1-methylhydantoin	11.527	152.029	1.19525	0.000291774	0.780312
Noradrenaline	13.109	243.06	1.1942	4.34872e-05	1.28218
Oxoproline	14.38	156.098	1.15714	0.0405488	0.657641
L-asparagine	16.538	116.088	1.15385	0.00278936	0.775317
L-proline	10.778	142.1	1.13675	0.0179426	0.749579
Dodecanoic acid, isopropanol ester	10.028	102.059	1.13532	0.000103674	0.799612
L-valine	9.369	144.1	1.12426	0.00265872	0.781582
Catechin	20.155	239.082	1.12151	0.0201669	1.32546
N-{2-hydroxyethyl}tetradecan-1-amine	9.126	226.04	1.11305	0.000780152	0.802501
D-fructose-1,6-bisphosphate	22.696	366.125	1.09646	0.0213698	1.32534
L-histidine	13.011	94.0455	1.05907	0.00389823	0.794898
1,5-anhydroglucitol	15.102	240.061	1.05658	0.0191093	0.791611
1-tetracosanol	25.099	411.178	1.01883	0.0172887	1.29083
L-isoleucine	10.684	158.1	1.01587	0.00353946	0.810857
D-myo-inositol 4-phosphate	23.79	221.094	1.01275	0.00159963	1.23184
